# Supplementary material for: Better safe than sorry—Whole-genome sequencing indicates that missense variants are significant in susceptibility to COVID-19
Source: PLoS One. 2023 Jan 20;18(1):e0279356. doi: 10.1371/journal.pone.0279356 (PMC9858061; doi:10.1371/journal.pone.0279356)
Supplement: S1 Table — (XLSX) [file pone.0279356.s001.xlsx]

## Sheet: Arkusz1
ID	Gene name	Gene ID	Transcript ID	Rs ID	Consequence	p-value
chr1_1636278_G_T	CDK11B	ENSG00000248333	ENST00000341832.11	rs61774909	intron_variant	0.00398239741876961
chr1_1657081_C_T	CDK11B	ENSG00000248333	ENST00000341832.11	rs61774957	intron_variant	1.4491155660127e-07
chr1_2376477_A_C	MORN1	ENSG00000116151	ENST00000378531.8	rs2843165	intron_variant	4.94358354671277e-05
chr1_2392128_T_C	RER1	ENSG00000157916	ENST00000605895.6	rs2935277	intron_variant	0.0152250591374811
chr1_3395872_C_T	PRDM16	ENSG00000142611	ENST00000270722.10	rs10909937	intron_variant	0.00245478668317419
chr1_3546785_C_G	MEGF6	ENSG00000162591	ENST00000356575.9	rs13374309	intron_variant	3.84061107513455e-06
chr1_3947968_T_C	LINC01346	ENSG00000233304	ENST00000412674.1	rs10799162	intron_variant	7.6585729562788e-05
chr1_3947992_G_A	LINC01346	ENSG00000233304	ENST00000412674.1	rs10915345	intron_variant	0.000180544495039617
chr1_4697816_T_C	AJAP1	ENSG00000196581	ENST00000378191.5	rs6669203	intron_variant	0.0118187768905434
chr1_4703341_C_T	AJAP1	ENSG00000196581	ENST00000378191.5	rs6681520	intron_variant	1.08740729796457e-05
chr1_4707693_A_G	AJAP1	ENSG00000196581	ENST00000378191.5	rs2101196	intron_variant	8.03909046559941e-40
chr1_4707962_C_T	AJAP1	ENSG00000196581	ENST00000378191.5	rs2086718	intron_variant	6.29325933453124e-05
chr1_4708480_T_C	AJAP1	ENSG00000196581	ENST00000378191.5	rs6688423	intron_variant	4.45160174874889e-07
chr1_4710005_T_C	AJAP1	ENSG00000196581	ENST00000378191.5	rs12760917	intron_variant	0.0213516479684107
chr1_4710386_T_C	AJAP1	ENSG00000196581	ENST00000378191.5	rs4654594	intron_variant	0.000136485386495253
chr1_4711605_G_C	AJAP1	ENSG00000196581	ENST00000378191.5	rs989309	intron_variant	0.025597589129409
chr1_4711993_T_C	AJAP1	ENSG00000196581	ENST00000378191.5	rs1061968	synonymous_variant	0.00237890078686949
chr1_6001588_A_G	KCNAB2	ENSG00000069424	ENST00000378097.6	rs481762	intron_variant	1.71526172529226e-06
chr1_6008757_A_G	KCNAB2	ENSG00000069424	ENST00000378097.6	rs517183	intron_variant	0.000789047710340967
chr1_6009795_G_C	KCNAB2	ENSG00000069424	ENST00000378097.6	rs486823	intron_variant	0.00111923469692377
chr1_6010810_C_T	KCNAB2	ENSG00000069424	ENST00000378097.6	rs546526	intron_variant	4.22530116666088e-05
chr1_6013379_G_T	KCNAB2	ENSG00000069424	ENST00000378097.6	rs482158	intron_variant	5.29203241511942e-05
chr1_6013406_C_G	KCNAB2	ENSG00000069424	ENST00000378097.6	rs551310	intron_variant	0.000178754478647132
chr1_6017926_T_C	KCNAB2	ENSG00000069424	ENST00000378097.6	rs2250582	intron_variant	5.29203241511942e-05
chr1_6019570_G_C	KCNAB2	ENSG00000069424	ENST00000378097.6	rs7539366	intron_variant	0.000220265038010173
chr1_6022962_A_C	KCNAB2	ENSG00000069424	ENST00000378097.6	rs12128295	intron_variant	0.000220265038010173
chr1_6024837_C_T	KCNAB2	ENSG00000069424	ENST00000378097.6	rs61760782	intron_variant	0.000523297583519265
chr1_6027143_T_A	KCNAB2	ENSG00000069424	ENST00000378097.6	rs12037728	intron_variant	0.000523297583519265
chr1_6027181_T_A	KCNAB2	ENSG00000069424	ENST00000378097.6	rs60876998	intron_variant	0.000159643920644109
chr1_6027949_G_A	KCNAB2	ENSG00000069424	ENST00000378097.6	rs10864321	intron_variant	0.0252206540944458
chr1_6032525_C_T	KCNAB2	ENSG00000069424	ENST00000378097.6	rs12566891	intron_variant	0.0312101883249349
chr1_6034028_G_T	KCNAB2	ENSG00000069424	ENST00000378097.6	rs7552747	intron_variant	0.000405906433775642
chr1_6034740_G_A	KCNAB2	ENSG00000069424	ENST00000378097.6	rs12076209	intron_variant	0.000349208398002096
chr1_6036268_C_T	KCNAB2	ENSG00000069424	ENST00000378097.6	rs11121073	intron_variant	5.11489929505532e-05
chr1_6641918_T_C	DNAJC11	ENSG00000007923	ENST00000377577.10	rs200448	intron_variant	0.00466413730431655
chr1_7125454_G_C	CAMTA1	ENSG00000171735	ENST00000303635.12	rs11120855	intron_variant	0.0152250591374811
chr1_7126265_G_A	CAMTA1	ENSG00000171735	ENST00000303635.12	rs4460663	intron_variant	0.0104068950971148
chr1_7132708_G_A	CAMTA1	ENSG00000171735	ENST00000303635.12	rs9434477	intron_variant	0.0468007483998626
chr1_7132879_G_C	CAMTA1	ENSG00000171735	ENST00000303635.12	rs9434479	intron_variant	0.0260571617500068
chr1_7133062_A_G	CAMTA1	ENSG00000171735	ENST00000303635.12	rs11120859	intron_variant	0.0260571617500068
chr1_7133473_T_G	CAMTA1	ENSG00000171735	ENST00000303635.12	rs2213773	intron_variant	0.0260571617500068
chr1_7136819_C_T	CAMTA1	ENSG00000171735	ENST00000303635.12	rs12090163	intron_variant	0.00859253703182709
chr1_7140515_A_G	CAMTA1	ENSG00000171735	ENST00000303635.12	rs9434855	intron_variant	0.000267623238430047
chr1_7141008_G_A	CAMTA1	ENSG00000171735	ENST00000303635.12	rs4908601	intron_variant	0.000267623238430047
chr1_7142130_T_C	CAMTA1	ENSG00000171735	ENST00000303635.12	rs970973	intron_variant	1.07980696005498e-05
chr1_7741820_T_G	CAMTA1	ENSG00000171735	ENST00000303635.12	rs10864313	intron_variant	1.34972404158319e-06
chr1_9678728_C_G	PIK3CD	ENSG00000171608	ENST00000377346.9	rs9430635	intron_variant	0.0129009544647562
chr1_9681135_A_G	PIK3CD	ENSG00000171608	ENST00000377346.9	rs6660363	intron_variant	0.0167099582473852
chr1_9681653_C_G	PIK3CD	ENSG00000171608	ENST00000377346.9	rs4420083	intron_variant	0.00151939320556251
chr1_9681654_C_G	PIK3CD	ENSG00000171608	ENST00000377346.9	rs4420084	intron_variant	0.000423500971525797
chr1_9681734_A_G	PIK3CD	ENSG00000171608	ENST00000377346.9	rs4333853	intron_variant	0.00332498574290866
chr1_9682096_T_C	PIK3CD	ENSG00000171608	ENST00000377346.9	rs9430640	intron_variant	0.0123669741822196
chr1_9682394_A_G	PIK3CD	ENSG00000171608	ENST00000377346.9	rs9430641	intron_variant	0.00332498574290866
chr1_9683671_G_A	PIK3CD	ENSG00000171608	ENST00000377346.9	rs4846192	intron_variant	0.0237662741950642
chr1_9686554_G_A	PIK3CD	ENSG00000171608	ENST00000377346.9	rs4846194	intron_variant	0.0139109606851557
chr1_9688387_T_G	PIK3CD	ENSG00000171608	ENST00000377346.9	rs6669509	intron_variant	0.000863402415532379
chr1_9690399_T_C	PIK3CD	ENSG00000171608	ENST00000377346.9	rs4240910	intron_variant	0.0347037936023616
chr1_10435708_T_C	CENPS	ENSG00000175279	ENST00000309048.8	rs201071645	intron_variant	5.9606585361234e-05
chr1_10437396_A_T	CENPS	ENSG00000175279	ENST00000309048.8	rs485665	intron_variant	3.47589515769641e-08
chr1_10742411_T_C	CASZ1	ENSG00000130940	ENST00000377022.8	rs11121609	intron_variant	0.00462105876859268
chr1_11718027_G_A	DRAXIN	ENSG00000162490	ENST00000294485.6	rs61773926	intron_variant	0.000796704533264205
chr1_13482278_G_T	LRRC38	ENSG00000162494	ENST00000376085.4	rs2924852	intron_variant	6.55458506219452e-05
chr1_14951214_C_A	KAZN	ENSG00000189337	ENST00000376030.7	rs4661548	intron_variant	0.0406687679100123
chr1_14960309_C_T	KAZN	ENSG00000189337	ENST00000376030.7	rs6429696	intron_variant	0.0154091708732144
chr1_15777650_T_C	FBLIM1	ENSG00000162458	ENST00000375766.8	rs12041627	intron_variant	5.00340825917908e-09
chr1_18728484_C_T	PAX7	ENSG00000009709	ENST00000420770.7	rs2236808	intron_variant	0.00207135985900751
chr1_18732979_A_T	PAX7	ENSG00000009709	ENST00000420770.7	rs9439732	intron_variant	5.23827027163352e-05
chr1_20068908_C_A	PLA2G5	ENSG00000127472	ENST00000486277.5	rs11573185	non_coding_transcript_exon_variant	5.66193770545993e-06
chr1_20088984_A_T	PLA2G5	ENSG00000127472	ENST00000375108.4	rs11573281	intron_variant	0.0116061992001902
chr1_21632773_C_A	RAP1GAP	ENSG00000076864	ENST00000374765.9	rs1557085	intron_variant	0.0368063452442805
chr1_21633097_T_C	RAP1GAP	ENSG00000076864	ENST00000374765.9	rs9426772	intron_variant	0.0368063452442805
chr1_21818308_G_A	LDLRAD2	ENSG00000187942	ENST00000344642.7	rs7555231	intron_variant	0.0270005537841931
chr1_22718335_A_G	EPHB2	ENSG00000133216	ENST00000374630.8	rs734445	intron_variant	7.82635053905622e-09
chr1_22741689_C_A	EPHB2	ENSG00000133216	ENST00000374630.8	rs12043267	intron_variant	0.000151863227197839
chr1_23725121_C_T	ELOAAS1	ENSG00000236810	ENST00000655402.1	rs12040737	intron_variant	4.78403414228936e-11
chr1_23876926_G_T	CNR2	ENSG00000188822	ENST00000374472.5	rs6658703	intron_variant	7.42272561345978e-10
chr1_23876935_C_T	CNR2	ENSG00000188822	ENST00000374472.5	rs2501434	intron_variant	1.3795103840335e-06
chr1_24604671_C_T	NCMAP	ENSG00000184454	ENST00000374392.3	rs59480262	intron_variant	2.60365909152814e-10
chr1_28391390_T_C	PHACTR4	ENSG00000204138	ENST00000373839.8	rs61783805	intron_variant	0.000171196558913107
chr1_29149775_C_T	SRSF4	ENSG00000116350	ENST00000373795.7	rs539128657	intron_variant	0.0239790998160937
chr1_41518941_C_T	HIVEP3	ENSG00000127124	ENST00000372583.6	rs621727	intron_variant	0.00611770962942159
chr1_41652018_C_G	HIVEP3	ENSG00000127124	ENST00000372583.6	rs10890157	intron_variant	0.0177951212829688
chr1_41652121_A_C	HIVEP3	ENSG00000127124	ENST00000372583.6	rs12130138	intron_variant	0.0177951212829688
chr1_41652314_C_T	HIVEP3	ENSG00000127124	ENST00000372583.6	rs10890158	intron_variant	9.47103991987033e-05
chr1_41652611_A_G	HIVEP3	ENSG00000127124	ENST00000372583.6	rs10890159	intron_variant	0.0182263366591964
chr1_41654173_T_C	HIVEP3	ENSG00000127124	ENST00000372583.6	rs2148636	intron_variant	0.0212247562917462
chr1_41654340_A_G	HIVEP3	ENSG00000127124	ENST00000372583.6	rs10890160	intron_variant	0.0196405784966383
chr1_41654745_G_A	HIVEP3	ENSG00000127124	ENST00000372583.6	rs6671999	intron_variant	0.00425043545373298
chr1_41656446_A_G	HIVEP3	ENSG00000127124	ENST00000372583.6	rs943376	intron_variant	4.40215013964264e-05
chr1_41841026_T_C	HIVEP3	ENSG00000127124	ENST00000372583.6	rs591655	intron_variant	0.0181718826984099
chr1_41841093_A_C	HIVEP3	ENSG00000127124	ENST00000372583.6	rs592083	intron_variant	0.00138568301543803
chr1_41842050_A_G	HIVEP3	ENSG00000127124	ENST00000372583.6	rs606549	intron_variant	0.00174115937340526
chr1_41842106_C_T	HIVEP3	ENSG00000127124	ENST00000372583.6	rs606923	intron_variant	0.00174115937340526
chr1_41844611_T_G	HIVEP3	ENSG00000127124	ENST00000372583.6	rs661662	intron_variant	0.00174115937340526
chr1_42335343_T_C	FOXJ3	ENSG00000198815	ENST00000372573.5	rs2487588	intron_variant	0.00109798001042902
chr1_44617685_T_C	RNF220	ENSG00000187147	ENST00000361799.7	rs11584765	intron_variant	0.00358304546721723
chr1_44622957_G_A	RNF220	ENSG00000187147	ENST00000361799.7	rs28453885	intron_variant	0.0320500248053341
chr1_44645688_A_G	RNF220	ENSG00000187147	ENST00000361799.7	rs12728857	intron_variant	0.0116766406553031
chr1_46349089_A_T	NSUN4	ENSG00000117481	ENST00000474844.6	rs56121132	intron_variant	0.000153900978822401
chr1_52886735_C_T	ZYG11A	ENSG00000203995	ENST00000371528.2	rs479569	intron_variant	0.00205834561275794
chr1_53367076_C_G	LINC02812	ENSG00000230138	ENST00000449958.1	rs12024169	non_coding_transcript_exon_variant	0.0400769623503586
chr1_54664069_C_T	MROH7	ENSG00000184313	ENST00000421030.7	rs689258	intron_variant	0.000744595884541962
chr1_57429542_C_T	DAB1	ENSG00000173406	ENST00000485760.5	rs1577158	intron_variant	0.0219318704282534
chr1_57924555_A_G	DAB1	ENSG00000173406	ENST00000485760.5	rs1202757	intron_variant	6.10399524252709e-05
chr1_58045735_T_G	DAB1	ENSG00000173406	ENST00000485760.5	rs4097304	intron_variant	1.14559824487213e-06
chr1_58045802_T_A	DAB1	ENSG00000173406	ENST00000485760.5	rs4087335	intron_variant	0.000289621653993732
chr1_58046016_T_C	DAB1	ENSG00000173406	ENST00000485760.5	rs4097305	intron_variant	5.03564156417893e-06
chr1_58046149_G_C	DAB1	ENSG00000173406	ENST00000485760.5	rs4097306	intron_variant	7.89580510716729e-06
chr1_58046377_T_C	DAB1	ENSG00000173406	ENST00000485760.5	rs4110981	intron_variant	4.70645969486346e-06
chr1_58047524_A_C	DAB1	ENSG00000173406	ENST00000485760.5	rs6696684	intron_variant	2.46161660146082e-06
chr1_58222008_T_C	DAB1	ENSG00000173406	ENST00000485760.5	rs12146090	intron_variant	0.00648526150678409
chr1_58697769_A_G	MYSM1	ENSG00000162601	ENST00000472487.6	rs6680626	intron_variant	4.05542499129715e-05
chr1_59333839_A_T	FGGY	ENSG00000172456	ENST00000303721.12	rs835382	intron_variant	1.60447354681994e-07
chr1_59440645_T_C	FGGY	ENSG00000172456	ENST00000303721.12	rs11207449	intron_variant	0.013097058756982
chr1_59450389_G_C	FGGY	ENSG00000172456	ENST00000303721.12	rs11207451	intron_variant	0.0199359960915699
chr1_59749806_T_A	FGGY	ENSG00000172456	ENST00000303721.12	rs1008417	intron_variant	2.48050586601947e-07
chr1_61203367_A_G	NFIA	ENSG00000162599	ENST00000403491.8	rs10889216	intron_variant	6.65192734457313e-08
chr1_61428981_C_T	NFIA	ENSG00000162599	ENST00000403491.8	rs2207793	intron_variant	0.0142501533279849
chr1_61429585_C_A	NFIA	ENSG00000162599	ENST00000403491.8	rs6587924	intron_variant	0.000128517106753454
chr1_61429917_C_A	NFIA	ENSG00000162599	ENST00000403491.8	rs6587925	intron_variant	0.000128517106753454
chr1_61431476_T_A	NFIA	ENSG00000162599	ENST00000403491.8	rs4915741	intron_variant	0.00138568301543803
chr1_61966626_C_T	PATJ	ENSG00000132849	ENST00000642238.2	rs35506226	intron_variant	4.3054904530925e-07
chr1_61996748_T_C	PATJ	ENSG00000132849	ENST00000642238.2	rs796705444	intron_variant	0.0103125974486727
chr1_63560548_A_G	EFCAB7	ENSG00000203965	ENST00000371088.5	rs217477	intron_variant	9.40975421172856e-22
chr1_66823147_C_G	DNAI4	ENSG00000152763	ENST00000371026.8	rs7364611	intron_variant	0.0268410428835809
chr1_68187806_T_G	WLS	ENSG00000116729	ENST00000262348.9	rs2026749	intron_variant	0.0400769623503586
chr1_68192584_A_C	WLS	ENSG00000116729	ENST00000262348.9	rs5774922	intron_variant	0.0287321836262398
chr1_69887996_T_C	LRRC7	ENSG00000033122	ENST00000651989.2	rs12736033	intron_variant	0.00710991013061346
chr1_71756424_C_A	NEGR1	ENSG00000172260	ENST00000357731.10	rs12739083	intron_variant	0.0066872792748291
chr1_74715925_G_C	CRYZ	ENSG00000116791	ENST00000340866.10	rs28589978	intron_variant	0.00196945720657355
chr1_76112220_C_A	ST6GALNAC3	ENSG00000184005	ENST00000328299.4	rs76077467	intron_variant	0.0325260717082591
chr1_77023718_A_T	ST6GALNAC5	ENSG00000117069	ENST00000477717.6	rs382631	intron_variant	0.0129009544647562
chr1_79004010_C_T	ADGRL4	ENSG00000162618	ENST00000370742.4	rs11162588	intron_variant	0.0101572839850286
chr1_79004180_T_C	ADGRL4	ENSG00000162618	ENST00000370742.4	rs11162589	intron_variant	0.000160710414583356
chr1_79004703_A_G	ADGRL4	ENSG00000162618	ENST00000370742.4	rs12404726	intron_variant	0.000643910335631384
chr1_79006111_A_G	ADGRL4	ENSG00000162618	ENST00000370742.4	rs12032432	intron_variant	0.00384865915905175
chr1_79012051_G_A	ADGRL4	ENSG00000162618	ENST00000655029.1	rs6689584	intron_variant	0.000299301613530489
chr1_79020467_C_T	ADGRL4	ENSG00000162618	ENST00000655029.1	rs6678232	intron_variant	0.000299301613530489
chr1_79024617_C_A	ADGRL4	ENSG00000162618	ENST00000655029.1	rs6691975	intron_variant	0.0101572839850286
chr1_85992068_T_C	COL24A1	ENSG00000171502	ENST00000370571.7	rs61783481	intron_variant	2.86300028866811e-06
chr1_89594016_G_T	LRRC8B	ENSG00000197147	ENST00000330947.7	rs12129433	3_prime_UTR_variant	0.00102337067361148
chr1_91800356_A_G	TGFBR3	ENSG00000069702	ENST00000212355.9	rs2996484	intron_variant	2.39678132203266e-10
chr1_91904435_C_T	TGFBR3	ENSG00000069702	ENST00000370399.6	rs11165758	intron_variant	8.00798405669263e-06
chr1_93714427_T_C	BCAR3	ENSG00000137936	ENST00000370244.5	rs11164966	intron_variant	0.0470748832545534
chr1_93719788_C_T	BCAR3	ENSG00000137936	ENST00000370244.5	rs4847183	intron_variant	0.0354260226164901
chr1_93731637_G_C	BCAR3	ENSG00000137936	ENST00000370244.5	rs11164970	intron_variant	0.00609893874197377
chr1_93738070_G_A	BCAR3	ENSG00000137936	ENST00000370244.5	rs4847254	intron_variant	0.00899427186097604
chr1_93738896_C_G	BCAR3	ENSG00000137936	ENST00000370244.5	rs947343	intron_variant	0.00788895378689747
chr1_93743420_A_G	BCAR3	ENSG00000137936	ENST00000370244.5	rs11582870	intron_variant	0.0179556485802661
chr1_93746568_C_T	BCAR3	ENSG00000137936	ENST00000370244.5	rs11164972	intron_variant	0.00393324832506039
chr1_93746569_G_A	BCAR3	ENSG00000137936	ENST00000370244.5	rs11164973	intron_variant	0.0179556485802661
chr1_93748716_C_T	BCAR3	ENSG00000137936	ENST00000370244.5	rs11164974	intron_variant	0.0179556485802661
chr1_93757302_C_A	BCAR3	ENSG00000137936	ENST00000370244.5	rs4520428	intron_variant	0.0179556485802661
chr1_93760871_G_A	BCAR3	ENSG00000137936	ENST00000370244.5	rs4847184	intron_variant	0.0179556485802661
chr1_93765066_C_T	BCAR3	ENSG00000137936	ENST00000370244.5	rs2747040	intron_variant	0.0179556485802661
chr1_93769311_T_C	BCAR3	ENSG00000137936	ENST00000370244.5	rs2747038	intron_variant	0.0179556485802661
chr1_93772680_T_C	BCAR3	ENSG00000137936	ENST00000370244.5	rs2818165	intron_variant	0.0179556485802661
chr1_93778362_A_T	BCAR3	ENSG00000137936	ENST00000370244.5	rs2747037	intron_variant	0.0179556485802661
chr1_93778954_G_A	BCAR3	ENSG00000137936	ENST00000370244.5	rs2818166	intron_variant	0.0179556485802661
chr1_93786560_A_T	BCAR3	ENSG00000137936	ENST00000370244.5	rs2747036	intron_variant	0.0179556485802661
chr1_93799657_T_A	BCAR3	ENSG00000137936	ENST00000370244.5	rs2747049	intron_variant	0.0179556485802661
chr1_93812203_T_C	BCAR3	ENSG00000137936	ENST00000370244.5	rs2747044	intron_variant	0.0179556485802661
chr1_93816122_C_T	BCAR3	ENSG00000137936	ENST00000370244.5	rs2747042	intron_variant	0.0179556485802661
chr1_93817523_G_A	BCAR3	ENSG00000137936	ENST00000370244.5	rs2818167	intron_variant	0.0179556485802661
chr1_93825774_C_G	BCAR3	ENSG00000137936	ENST00000370244.5	rs6541399	intron_variant	0.0179556485802661
chr1_93828936_T_C	BCAR3	ENSG00000137936	ENST00000370244.5	rs7552293	intron_variant	0.0179556485802661
chr1_93830507_G_T	BCAR3	ENSG00000137936	ENST00000370244.5	rs10874797	intron_variant	0.0179556485802661
chr1_93834186_C_T	BCAR3	ENSG00000137936	ENST00000370244.5	rs2092700	intron_variant	0.0179556485802661
chr1_93835407_G_A	BCAR3	ENSG00000137936	ENST00000370244.5	rs6703684	intron_variant	0.0179556485802661
chr1_93839296_T_G	BCAR3	ENSG00000137936	ENST00000370244.5	rs6667986	intron_variant	0.0179556485802661
chr1_93839370_C_T	BCAR3	ENSG00000137936	ENST00000370244.5	rs6660210	intron_variant	0.0179556485802661
chr1_93844221_T_C	BCAR3	ENSG00000137936	ENST00000370244.5	rs12097812	intron_variant	0.000109798266681849
chr1_93845138_G_C	BCAR3	ENSG00000137936	ENST00000370244.5	rs2391315	intron_variant	0.000109798266681849
chr1_94687535_G_A	SLC44A3AS1	ENSG00000224081	ENST00000452922.5	rs10218699	intron_variant	0.0429962356291234
chr1_94687551_G_A	SLC44A3AS1	ENSG00000224081	ENST00000452922.5	rs10218700	intron_variant	0.0429962356291234
chr1_94687584_G_A	SLC44A3AS1	ENSG00000224081	ENST00000452922.5	rs10218701	intron_variant	0.0429962356291234
chr1_94688458_T_C	SLC44A3AS1	ENSG00000224081	ENST00000452922.5	rs35242318	intron_variant	0.000213803023318941
chr1_94689057_G_A	SLC44A3AS1	ENSG00000224081	ENST00000452922.5	rs4000657	intron_variant	0.00248579891533727
chr1_94689114_G_C	SLC44A3AS1	ENSG00000224081	ENST00000452922.5	rs4000658	intron_variant	0.00248579891533727
chr1_94689229_C_T	SLC44A3AS1	ENSG00000224081	ENST00000452922.5	rs4240960	intron_variant	0.00248579891533727
chr1_94689417_G_T	SLC44A3AS1	ENSG00000224081	ENST00000452922.5	rs7412205	intron_variant	0.00248579891533727
chr1_94689425_C_T	SLC44A3AS1	ENSG00000224081	ENST00000452922.5	rs7416454	intron_variant	0.00248579891533727
chr1_94689454_A_G	SLC44A3AS1	ENSG00000224081	ENST00000452922.5	rs12725936	intron_variant	0.00248579891533727
chr1_94689457_G_A	SLC44A3AS1	ENSG00000224081	ENST00000452922.5	rs12743410	intron_variant	0.00248579891533727
chr1_94690107_C_T	SLC44A3AS1	ENSG00000224081	ENST00000452922.5	rs11165215	intron_variant	0.00248579891533727
chr1_94690485_G_A	SLC44A3AS1	ENSG00000224081	ENST00000452922.5	rs10874879	intron_variant	0.00248579891533727
chr1_94690675_A_C	SLC44A3AS1	ENSG00000224081	ENST00000452922.5	rs10782990	intron_variant	0.00248579891533727
chr1_94691159_C_T	SLC44A3AS1	ENSG00000224081	ENST00000452922.5	rs10874880	intron_variant	0.00248579891533727
chr1_94691183_G_A	SLC44A3AS1	ENSG00000224081	ENST00000452922.5	rs10874881	intron_variant	0.00248579891533727
chr1_94691221_C_G	SLC44A3AS1	ENSG00000224081	ENST00000452922.5	rs11165217	intron_variant	0.00248579891533727
chr1_94691694_T_C	SLC44A3AS1	ENSG00000224081	ENST00000452922.5	rs10874882	intron_variant	0.00248579891533727
chr1_94691839_C_A	SLC44A3AS1	ENSG00000224081	ENST00000452922.5	rs10782991	intron_variant	0.00248579891533727
chr1_94692183_T_C	SLC44A3AS1	ENSG00000224081	ENST00000452922.5	rs10874883	intron_variant	0.00248579891533727
chr1_94692344_A_G	SLC44A3AS1	ENSG00000224081	ENST00000452922.5	rs2040077	intron_variant	0.00248579891533727
chr1_94692486_C_T	SLC44A3AS1	ENSG00000224081	ENST00000452922.5	rs10874884	intron_variant	0.00248579891533727
chr1_94692602_A_T	SLC44A3AS1	ENSG00000224081	ENST00000452922.5	rs2040076	intron_variant	0.00248579891533727
chr1_94692728_T_C	SLC44A3AS1	ENSG00000224081	ENST00000452922.5	rs2040075	intron_variant	0.00248579891533727
chr1_94692801_C_G	SLC44A3AS1	ENSG00000224081	ENST00000452922.5	rs2040074	intron_variant	0.00248579891533727
chr1_94693047_C_T	SLC44A3AS1	ENSG00000224081	ENST00000452922.5	rs4847340	intron_variant	0.00248579891533727
chr1_94694055_G_A	SLC44A3AS1	ENSG00000224081	ENST00000452922.5	rs11165218	intron_variant	0.00786489493504146
chr1_94695225_A_T	SLC44A3AS1	ENSG00000224081	ENST00000452922.5	rs12145601	intron_variant	0.00979378381011793
chr1_94696061_G_A	SLC44A3AS1	ENSG00000224081	ENST00000452922.5	rs12120217	intron_variant	0.00979378381011793
chr1_94696628_C_T	SLC44A3AS1	ENSG00000224081	ENST00000452922.5	rs12757945	intron_variant	0.00979378381011793
chr1_94698170_G_A	SLC44A3AS1	ENSG00000224081	ENST00000452922.5	rs12116841	intron_variant	0.00979378381011793
chr1_94701339_C_T	SLC44A3AS1	ENSG00000224081	ENST00000452922.5	rs12127717	intron_variant	0.0176359934938242
chr1_94703885_G_A	SLC44A3AS1	ENSG00000224081	ENST00000452922.5	rs2893273	intron_variant	0.0188359290827425
chr1_94704601_A_G	SLC44A3AS1	ENSG00000224081	ENST00000452922.5	rs1891874	intron_variant	0.0477670786139574
chr1_94715516_C_T	SLC44A3AS1	ENSG00000224081	ENST00000452922.5	rs4847346	intron_variant	0.00201342203725459
chr1_94720350_T_C	SLC44A3AS1	ENSG00000224081	ENST00000452922.5	rs2933917	intron_variant	0.00234919259126414
chr1_94721870_T_G	SLC44A3AS1	ENSG00000224081	ENST00000452922.5	rs11582204	intron_variant	0.0219318704282534
chr1_94721965_G_T	SLC44A3AS1	ENSG00000224081	ENST00000452922.5	rs2997377	intron_variant	0.0113629034022849
chr1_94722023_A_C	SLC44A3AS1	ENSG00000224081	ENST00000452922.5	rs2640061	intron_variant	0.0143362037730911
chr1_94722038_T_C	SLC44A3AS1	ENSG00000224081	ENST00000452922.5	rs2802102	intron_variant	0.00737588539707364
chr1_94722118_T_A	SLC44A3AS1	ENSG00000224081	ENST00000452922.5	rs11165226	intron_variant	0.0143362037730911
chr1_94722355_G_A	SLC44A3AS1	ENSG00000224081	ENST00000452922.5	rs2802103	intron_variant	0.018280949692323
chr1_96006212_T_A	LINC02790	ENSG00000237435	ENST00000442558.5	rs321249	intron_variant	0.000789047710340967
chr1_96012266_C_A	LINC02790	ENSG00000237435	ENST00000442558.5	rs321238	intron_variant	0.024482941711984
chr1_96013819_G_A	LINC02790	ENSG00000237435	ENST00000442558.5	rs321232	intron_variant	0.000759133861102379
chr1_96019024_T_C	LINC02790	ENSG00000237435	ENST00000442558.5	rs671266	intron_variant	0.000812236863770083
chr1_96019384_G_A	LINC02790	ENSG00000237435	ENST00000442558.5	rs635754	intron_variant	0.000633581644343223
chr1_97985232_C_T	MIR137HG	ENSG00000225206	ENST00000602672.2	rs12094520	intron_variant	0.0160226524857022
chr1_97985903_A_G	MIR137HG	ENSG00000225206	ENST00000602672.2	rs36028749	intron_variant	0.0160226524857022
chr1_97995887_C_T	MIR137HG	ENSG00000225206	ENST00000602672.2	rs9662365	intron_variant	0.000680275225773698
chr1_98027024_A_G	MIR137HG	ENSG00000225206	ENST00000602672.2	rs9440302	intron_variant	0.0372415001905703
chr1_99005171_G_C	PLPPR5AS1	ENSG00000232825	ENST00000658279.1	rs1869936	intron_variant	0.000629495714917267
chr1_99495563_C_G	LINC01708	ENSG00000224445	ENST00000635551.1	rs7517397	intron_variant	4.36983708662251e-07
chr1_103107180_A_T	COL11A1	ENSG00000060718	ENST00000370096.9	rs4908291	intron_variant	6.75753221508987e-05
chr1_108735360_G_C	FNDC7	ENSG00000143107	ENST00000370017.9	rs11102324	intron_variant	0.00237890078686949
chr1_108737169_G_T	FNDC7	ENSG00000143107	ENST00000370017.9	rs7522448	intron_variant	0.0016447215160052
chr1_108738188_G_A	FNDC7	ENSG00000143107	ENST00000370017.9	rs928478	intron_variant	0.00941431338744576
chr1_108747589_G_C	STXBP3	ENSG00000116266	ENST00000370008.4	rs11102337	intron_variant	0.0454532231818273
chr1_108750030_T_C	STXBP3	ENSG00000116266	ENST00000370008.4	rs872337	intron_variant	0.0454532231818273
chr1_108764444_T_C	STXBP3	ENSG00000116266	ENST00000370008.4	rs7545914	intron_variant	0.0314877232650282
chr1_108767834_A_C	STXBP3	ENSG00000116266	ENST00000370008.4	rs58551431	intron_variant	0.0314877232650282
chr1_108769874_C_T	STXBP3	ENSG00000116266	ENST00000370008.4	rs61797326	intron_variant	0.0314877232650282
chr1_108780998_C_T	STXBP3	ENSG00000116266	ENST00000370008.4	rs12131095	intron_variant	0.0314877232650282
chr1_108781598_A_T	STXBP3	ENSG00000116266	ENST00000370008.4	rs6697576	intron_variant	0.0314877232650282
chr1_108784492_T_C	STXBP3	ENSG00000116266	ENST00000370008.4	rs6659835	intron_variant	0.0314877232650282
chr1_108791924_T_C	STXBP3	ENSG00000116266	ENST00000370008.4	rs12139371	intron_variant	0.0314877232650282
chr1_108794364_T_A	STXBP3	ENSG00000116266	ENST00000370008.4	rs6675862	intron_variant	0.0314877232650282
chr1_108796239_G_C	STXBP3	ENSG00000116266	ENST00000370008.4	rs1127635	synonymous_variant	0.0314877232650282
chr1_108798669_C_T	STXBP3	ENSG00000116266	ENST00000370008.4	rs4970812	intron_variant	0.0314877232650282
chr1_108802362_A_G	STXBP3	ENSG00000116266	ENST00000370008.4	rs61797349	intron_variant	0.019758229866883
chr1_108806685_A_G	STXBP3	ENSG00000116266	ENST00000370008.4	rs6680575	intron_variant	0.0171668889159122
chr1_108808188_G_T	STXBP3	ENSG00000116266	ENST00000370008.4	rs12409133	intron_variant	0.0459876374989714
chr1_108808209_G_C	STXBP3	ENSG00000116266	ENST00000370008.4	rs11102473	intron_variant	0.00693781853793533
chr1_109068704_T_G	TAF13	ENSG00000197780	ENST00000338366.6	rs28634276	intron_variant	0.0351147207123741
chr1_109068873_G_A	TAF13	ENSG00000197780	ENST00000338366.6	rs34747818	intron_variant	0.0207863977020303
chr1_109668196_C_T	GSTM2	ENSG00000213366	ENST00000241337.9	rs2073483	intron_variant	0.0192341522744522
chr1_109702713_G_A	GSTM2	ENSG00000213366	ENST00000369831.6	rs12749429	intron_variant	0.0033562220077173
chr1_109737199_C_A	GSTM3	ENSG00000134202	ENST00000361066.7	rs1537234	intron_variant	0.0329118622877931
chr1_109833841_C_A	LINC01768	ENSG00000228420	ENST00000453347.1	rs11102013	intron_variant	0.0248491301466279
chr1_110198066_C_T	SLC6A17	ENSG00000197106	ENST00000331565.5	rs2761445	splice_polypyrimidine_tract_variant	0.00453606411918378
chr1_111959190_T_C	KCND3	ENSG00000171385	ENST00000302127.5	rs1373290	intron_variant	0.00108750120714074
chr1_111967071_C_T	KCND3	ENSG00000171385	ENST00000302127.5	rs2995814	intron_variant	1.82904623564307e-05
chr1_111967106_C_A	KCND3	ENSG00000171385	ENST00000302127.5	rs3008539	intron_variant	2.70335260714368e-08
chr1_113123731_G_T	LRIG2	ENSG00000198799	ENST00000361127.6	rs1728223	intron_variant	0.0335977488189544
chr1_115757516_A_G	CASQ2	ENSG00000118729	ENST00000261448.6	rs9428221	intron_variant	0.0346017960068457
chr1_115758944_G_A	CASQ2	ENSG00000118729	ENST00000261448.6	rs9428087	intron_variant	0.0179556485802661
chr1_115759971_C_T	CASQ2	ENSG00000118729	ENST00000261448.6	rs4143097	intron_variant	0.0237662741950642
chr1_115762325_T_G	CASQ2	ENSG00000118729	ENST00000261448.6	rs57610221	intron_variant	0.0228651094940457
chr1_115765225_G_A	CASQ2	ENSG00000118729	ENST00000261448.6	rs9428090	intron_variant	0.0237662741950642
chr1_115766579_C_T	CASQ2	ENSG00000118729	ENST00000261448.6	rs9428227	intron_variant	0.01442276088223
chr1_115767677_T_C	CASQ2	ENSG00000118729	ENST00000261448.6	rs9428091	intron_variant	0.00765156291838034
chr1_119131464_T_G	WARS2	ENSG00000116874	ENST00000235521.5	rs9428295	intron_variant	5.97132608826476e-06
chr1_120984161_A_T	LINC00623	ENSG00000226067	ENST00000614062.1	rs3795676	intron_variant	0.00279141920568911
chr1_121214089_C_T	SRGAP2C	ENSG00000171943	ENST00000367123.8	rs10903202	intron_variant	5.47517623664969e-05
chr1_121232029_A_C	SRGAP2C	ENSG00000171943	ENST00000367123.8	rs587640280	intron_variant	0.000152370173097836
chr1_146576772_T_C	HYDIN2	ENSG00000276975	ENST00000614586.3	rs1372867061	intron_variant	8.97441155877532e-05
chr1_147490127_G_A	LINC00624	ENSG00000278811	ENST00000619867.4	rs55775788	intron_variant	0.00147660125814631
chr1_148400481_A_G	LINC01138	ENSG00000274020	ENST00000640832.1	rs796357233	intron_variant	0.00301839269794915
chr1_148477912_T_A	LINC01138	ENSG00000274020	ENST00000639181.1	rs12136644	intron_variant	2.97044500439151e-14
chr1_149047015_G_A	PDE4DIP	ENSG00000178104	ENST00000525630.5	rs61808046	splice_polypyrimidine_tract_variant	4.20021743425879e-09
chr1_150506486_G_A	TARS2	ENSG00000143374	ENST00000369064.8	rs12063699	intron_variant	5.25613121072151e-05
chr1_150601780_C_T	ENSA	ENSG00000143420	ENST00000369016.8	rs10888384	intron_variant	1.52174250382746e-06
chr1_153766793_A_G	INTS3	ENSG00000143624	ENST00000318967.7	rs6677628	intron_variant	0.000194218679293367
chr1_154445353_C_T	IL6R	ENSG00000160712	ENST00000368485.8	rs4845373	intron_variant	0.0192341522744522
chr1_154460401_C_G	IL6R	ENSG00000160712	ENST00000368485.8	rs6690230	intron_variant	0.00540915178739009
chr1_154460481_A_G	IL6R	ENSG00000160712	ENST00000368485.8	rs6695045	intron_variant	0.00540915178739009
chr1_156205046_A_T	SLC25A44	ENSG00000160785	ENST00000359511.5	rs2736606	intron_variant	0.000682475806718771
chr1_156228575_G_A	PMF1	ENSG00000160783	ENST00000368277.3	rs3768276	intron_variant	0.000271172475215783
chr1_158941546_G_C	PYHIN1	ENSG00000163564	ENST00000368140.6	rs11265121	intron_variant	1.42353947380484e-05
chr1_160039331_A_C	KCNJ10	ENSG00000177807	ENST00000644903.1	rs1053074	3_prime_UTR_variant	0.0404310313752412
chr1_164608291_C_T	PBX1	ENSG00000185630	ENST00000420696.7	rs2792260	intron_variant	0.00314344571285299
chr1_164608999_C_G	PBX1	ENSG00000185630	ENST00000420696.7	rs2792259	intron_variant	0.00706650065003247
chr1_164609005_A_C	PBX1	ENSG00000185630	ENST00000420696.7	rs2800789	intron_variant	0.00706650065003247
chr1_164609415_G_C	PBX1	ENSG00000185630	ENST00000420696.7	rs2800788	intron_variant	0.00324307087703259
chr1_164609580_A_G	PBX1	ENSG00000185630	ENST00000420696.7	rs2800787	intron_variant	0.00950058930308415
chr1_164611440_G_C	PBX1	ENSG00000185630	ENST00000420696.7	rs2800786	intron_variant	1.26872006417388e-06
chr1_164612378_A_G	PBX1	ENSG00000185630	ENST00000420696.7	rs1780355	intron_variant	0.00632794783223248
chr1_164617047_A_G	PBX1	ENSG00000185630	ENST00000420696.7	rs2792258	intron_variant	0.0033562220077173
chr1_164617855_C_T	PBX1	ENSG00000185630	ENST00000420696.7	rs2800783	intron_variant	0.0033562220077173
chr1_164626252_C_T	PBX1	ENSG00000185630	ENST00000420696.7	rs2996669	intron_variant	0.00730849519409598
chr1_164630331_G_A	PBX1	ENSG00000185630	ENST00000420696.7	rs2996668	intron_variant	0.0221286714214302
chr1_164630920_G_A	PBX1	ENSG00000185630	ENST00000420696.7	rs1770552	intron_variant	0.010034678488298
chr1_164634550_C_T	PBX1	ENSG00000185630	ENST00000420696.7	rs1770550	intron_variant	0.0150883848193625
chr1_166080303_T_C	FAM78B	ENSG00000188859	ENST00000354422.4	rs4233411	intron_variant	0.00537591116150193
chr1_167532875_T_C	CREG1	ENSG00000143162	ENST00000466652.2	rs858492	intron_variant	0.00163433411620138
chr1_167669833_G_C	RCSD1	ENSG00000198771	ENST00000367854.8	rs1229362	intron_variant	0.00022842321596713
chr1_167669902_T_A	RCSD1	ENSG00000198771	ENST00000367854.8	rs1229361	intron_variant	2.25764872272889e-06
chr1_168711010_C_T	DPT	ENSG00000143196	ENST00000367817.4	rs12084348	intron_variant	3.36515912317995e-11
chr1_168922943_T_C	LINC00970	ENSG00000203601	ENST00000366408.3	rs6427160	intron_variant	4.28820243747871e-10
chr1_168925121_C_A	LINC00970	ENSG00000203601	ENST00000366408.3	rs12096067	intron_variant	4.28820243747871e-10
chr1_168927540_G_A	LINC00970	ENSG00000203601	ENST00000366408.3	rs4656170	intron_variant	3.72690441986394e-09
chr1_168927926_A_C	LINC00970	ENSG00000203601	ENST00000366408.3	rs2093486	intron_variant	3.10996406135049e-10
chr1_168931050_G_A	LINC00970	ENSG00000203601	ENST00000366408.3	rs2900884	intron_variant	6.62965422609613e-09
chr1_168932101_C_G	LINC00970	ENSG00000203601	ENST00000366408.3	rs1407480	intron_variant	1.45585555778286e-08
chr1_168932175_C_T	LINC00970	ENSG00000203601	ENST00000366408.3	rs1407481	intron_variant	1.33860581646514e-07
chr1_168932323_G_C	LINC00970	ENSG00000203601	ENST00000366408.3	rs1014249	intron_variant	0.0426203045098335
chr1_169033143_A_G	LINC00970	ENSG00000203601	ENST00000366408.3	rs5005856	intron_variant	0.000578668253227692
chr1_171623212_T_C	MYOCOS	ENSG00000283683	ENST00000637642.2	rs763224	intron_variant	0.0469376209589852
chr1_173044627_C_A	TNFSF18	ENSG00000120337	ENST00000404377.5	rs975074	intron_variant	0.0240504535733768
chr1_175325812_G_A	TNR	ENSG00000116147	ENST00000367674.7	rs10798383	intron_variant	0.00566493405581487
chr1_175470556_C_T	TNR	ENSG00000116147	ENST00000367674.7	rs4652095	intron_variant	0.0125172999409575
chr1_175475797_G_A	TNR	ENSG00000116147	ENST00000367674.7	rs859413	intron_variant	0.0468007483998626
chr1_175478660_C_T	TNR	ENSG00000116147	ENST00000367674.7	rs859415	intron_variant	3.98027956300835e-06
chr1_175481472_T_A	TNR	ENSG00000116147	ENST00000367674.7	rs704817	intron_variant	0.0392625044315025
chr1_175498025_C_A	TNR	ENSG00000116147	ENST00000367674.7	rs859391	intron_variant	0.00552708178597684
chr1_175509547_C_T	TNR	ENSG00000116147	ENST00000367674.7	rs859379	intron_variant	0.000129379452389081
chr1_175513220_C_A	TNR	ENSG00000116147	ENST00000367674.7	rs859355	intron_variant	6.94309242430291e-05
chr1_175515033_C_T	TNR	ENSG00000116147	ENST00000367674.7	rs704820	intron_variant	6.94309242430291e-05
chr1_175519273_G_T	TNR	ENSG00000116147	ENST00000367674.7	rs10912994	intron_variant	0.000623415120503121
chr1_175520414_G_A	TNR	ENSG00000116147	ENST00000367674.7	rs992593	intron_variant	6.94309242430291e-05
chr1_175521482_C_G	TNR	ENSG00000116147	ENST00000367674.7	rs859356	intron_variant	4.69710951889923e-05
chr1_175523223_C_T	TNR	ENSG00000116147	ENST00000367674.7	rs864163	intron_variant	4.84350829527769e-05
chr1_175527214_A_G	TNR	ENSG00000116147	ENST00000367674.7	rs2171027	intron_variant	0.0384641753887183
chr1_176261624_A_C	COP1DT	ENSG00000236021	ENST00000654248.1	rs352315	intron_variant	0.000429063315131824
chr1_176751875_C_A	PAPPA2	ENSG00000116183	ENST00000367662.5	rs147368376	intron_variant	0.0273223514571827
chr1_179465083_A_G	AXDND1	ENSG00000162779	ENST00000367618.8	rs12129401	intron_variant	1.65633178306012e-10
chr1_180980224_C_A	STX6	ENSG00000135823	ENST00000258301.6	rs56153798	intron_variant	1.4006960745471e-07
chr1_181555703_T_A	CACNA1E	ENSG00000198216	ENST00000367573.7	rs10797726	intron_variant	0.00401965237013104
chr1_181796075_G_C	CACNA1E	ENSG00000198216	ENST00000367573.7	rs503715	intron_variant	0.00628920517727299
chr1_182587195_T_C	RNASEL	ENSG00000135828	ENST00000367559.7	rs620070	intron_variant	0.000560208002017839
chr1_182589002_T_C	RNASEL	ENSG00000135828	ENST00000367559.7	rs10911102	intron_variant	0.00126753255079179
chr1_182599594_C_G	RGS16	ENSG00000143333	ENST00000367558.6	rs680431	3_prime_UTR_variant	0.000264991202570394
chr1_182601868_C_T	RGS16	ENSG00000143333	ENST00000367558.6	rs610367	intron_variant	5.64188099825329e-06
chr1_185287929_T_C	SWT1	ENSG00000116668	ENST00000367500.9	rs12135769	intron_variant	0.0303918064457642
chr1_186075715_T_C	HMCN1	ENSG00000143341	ENST00000271588.9	rs10752961	intron_variant	0.0462571340665024
chr1_193041493_T_C	UCHL5	ENSG00000116750	ENST00000367454.6	rs6661522	intron_variant	0.0322396234254779
chr1_200578919_G_A	KIF14	ENSG00000118193	ENST00000367350.5	rs59162409	intron_variant	0.00296232802455103
chr1_200587398_G_A	KIF14	ENSG00000118193	ENST00000367350.5	rs12128383	intron_variant	0.0011085575376852
chr1_200912044_C_A	INAVA	ENSG00000163362	ENST00000413687.3	rs296521	synonymous_variant	2.76072737243602e-05
chr1_200914418_G_A	INAVA	ENSG00000163362	ENST00000413687.3	rs296523	3_prime_UTR_variant	8.50214240042745e-09
chr1_200914577_C_T	INAVA	ENSG00000163362	ENST00000413687.3	rs296524	3_prime_UTR_variant	1.22386368598302e-09
chr1_200914805_G_T	INAVA	ENSG00000163362	ENST00000413687.3	rs296525	3_prime_UTR_variant	7.98798878488025e-10
chr1_200919984_C_T	MROH3P	ENSG00000233217	ENST00000435735.2	rs296540	intron_variant	2.00292470831971e-09
chr1_200921225_G_T	MROH3P	ENSG00000233217	ENST00000435735.2	rs296544	intron_variant	6.20952507696611e-08
chr1_200926330_C_T	MROH3P	ENSG00000233217	ENST00000435735.2	rs296551	intron_variant	2.00292470831971e-09
chr1_200954207_G_A	MROH3P	ENSG00000233217	ENST00000435735.2	rs432209	intron_variant	3.67206163568492e-05
chr1_200959647_A_T	MROH3P	ENSG00000233217	ENST00000435735.2	rs296553	intron_variant	0.000852375212550856
chr1_200963177_G_A	MROH3P	ENSG00000233217	ENST00000435735.2	rs1572789	intron_variant	0.00120835040269109
chr1_200964167_G_A	MROH3P	ENSG00000233217	ENST00000435735.2	rs11805959	intron_variant	0.00120835040269109
chr1_200964468_T_C	MROH3P	ENSG00000233217	ENST00000435735.2	rs2063121	intron_variant	0.00531002714530303
chr1_202650440_G_T	SYT2	ENSG00000143858	ENST00000367268.5	rs12724779	intron_variant	0.000324908673795727
chr1_204171778_G_A	REN	ENSG00000143839	ENST00000638118.1	rs7539596	intron_variant	0.000914776309845827
chr1_204907941_T_C	NFASC	ENSG00000163531	ENST00000339876.11	rs12059452	intron_variant	0.000174645108472518
chr1_204908542_T_G	NFASC	ENSG00000163531	ENST00000339876.11	rs2369423	intron_variant	0.000838784799769939
chr1_204909399_A_G	NFASC	ENSG00000163531	ENST00000339876.11	rs7552321	intron_variant	2.51522888403162e-05
chr1_204910695_A_T	NFASC	ENSG00000163531	ENST00000339876.11	rs6703744	intron_variant	4.92931885560234e-06
chr1_204910906_G_C	NFASC	ENSG00000163531	ENST00000339876.11	rs4611084	intron_variant	0.00169226903622958
chr1_204911408_A_C	NFASC	ENSG00000163531	ENST00000339876.11	rs6658163	intron_variant	4.92931885560234e-06
chr1_204912077_A_G	NFASC	ENSG00000163531	ENST00000339876.11	rs1575366	intron_variant	0.00101358885777114
chr1_204912079_G_A	NFASC	ENSG00000163531	ENST00000339876.11	rs1575367	intron_variant	0.0333021091564164
chr1_204912210_C_T	NFASC	ENSG00000163531	ENST00000339876.11	rs2887480	intron_variant	0.00843679361146835
chr1_204912285_T_G	NFASC	ENSG00000163531	ENST00000339876.11	rs2369426	intron_variant	0.000625435571869145
chr1_204912471_T_C	NFASC	ENSG00000163531	ENST00000339876.11	rs4556420	intron_variant	0.00101358885777114
chr1_204913100_A_C	NFASC	ENSG00000163531	ENST00000339876.11	rs2078505	intron_variant	0.00101358885777114
chr1_204913164_C_T	NFASC	ENSG00000163531	ENST00000339876.11	rs1989373	intron_variant	0.00101358885777114
chr1_204913382_G_A	NFASC	ENSG00000163531	ENST00000339876.11	rs4592302	intron_variant	0.00843679361146835
chr1_204913405_A_G	NFASC	ENSG00000163531	ENST00000339876.11	rs4381257	intron_variant	0.00101358885777114
chr1_204913823_A_G	NFASC	ENSG00000163531	ENST00000339876.11	rs7520507	intron_variant	0.00529367971639877
chr1_204915581_G_A	NFASC	ENSG00000163531	ENST00000339876.11	rs11579650	intron_variant	0.000914776309845827
chr1_204915708_T_A	NFASC	ENSG00000163531	ENST00000339876.11	rs10900432	intron_variant	0.0122924730947226
chr1_204919216_G_T	NFASC	ENSG00000163531	ENST00000339876.11	rs9793674	intron_variant	0.00423728148169261
chr1_204919626_G_T	NFASC	ENSG00000163531	ENST00000339876.11	rs4950973	intron_variant	0.0049005964142647
chr1_204920404_C_T	NFASC	ENSG00000163531	ENST00000339876.11	rs11240310	intron_variant	2.00174401966513e-05
chr1_204926088_G_A	NFASC	ENSG00000163531	ENST00000339876.11	rs2802851	intron_variant	0.000799272923404315
chr1_205577487_C_T	MFSD4A	ENSG00000174514	ENST00000367147.9	rs12759507	intron_variant	0.0019509036647008
chr1_205592967_C_T	MFSD4A	ENSG00000174514	ENST00000367147.9	rs7529777	intron_variant	4.66517057715379e-05
chr1_205631525_C_T	ELK4	ENSG00000158711	ENST00000357992.9	rs6593957	intron_variant	4.15368774185781e-05
chr1_205749730_A_T	NUCKS1	ENSG00000069275	ENST00000367142.5	rs7536483	intron_variant	0.00189028399927322
chr1_205832744_A_G	PM20D1	ENSG00000162877	ENST00000367136.5	rs1361754	missense_variant	0.00746668310562092
chr1_206510390_A_G	RASSF5	ENSG00000266094	ENST00000579436.7	rs1108871	intron_variant	8.19361661873351e-05
chr1_206511644_A_C	RASSF5	ENSG00000266094	ENST00000579436.7	rs874718	intron_variant	8.38940392900727e-05
chr1_206511645_A_T	RASSF5	ENSG00000266094	ENST00000579436.7	rs874717	intron_variant	8.38940392900727e-05
chr1_206516953_C_T	RASSF5	ENSG00000266094	ENST00000579436.7	rs17046987	intron_variant	3.51196897264282e-05
chr1_206517450_T_C	RASSF5	ENSG00000266094	ENST00000579436.7	rs11583254	intron_variant	2.2209475402324e-05
chr1_206519300_T_G	RASSF5	ENSG00000266094	ENST00000579436.7	rs7548639	intron_variant	0.00997391839120917
chr1_206519826_C_G	RASSF5	ENSG00000266094	ENST00000579436.7	rs7544154	intron_variant	0.00254099402919396
chr1_206520410_A_C	RASSF5	ENSG00000266094	ENST00000579436.7	rs6696388	intron_variant	0.000590028745001508
chr1_206520545_T_C	RASSF5	ENSG00000266094	ENST00000579436.7	rs11118941	intron_variant	0.00767498470749732
chr1_206525016_A_G	RASSF5	ENSG00000266094	ENST00000579436.7	rs4559502	intron_variant	7.1273865218031e-06
chr1_206530152_T_A	RASSF5	ENSG00000266094	ENST00000579436.7	rs6540447	intron_variant	1.79796666116627e-06
chr1_207094126_C_T	C4BPB	ENSG00000123843	ENST00000367078.8	rs5016294	intron_variant	0.0389184066929509
chr1_207094746_A_C	C4BPB	ENSG00000123843	ENST00000367078.8	rs4403634	intron_variant	2.22864607947856e-05
chr1_207095434_A_G	C4BPB	ENSG00000123843	ENST00000367078.8	rs7542292	intron_variant	0.00037040569868783
chr1_209919341_C_A	SYT14	ENSG00000143469	ENST00000652023.1	rs141674570	intron_variant	4.90696431087908e-11
chr1_209921703_T_C	SYT14	ENSG00000143469	ENST00000652023.1	rs2038055	intron_variant	1.39541542295281e-07
chr1_209976310_G_A	SYT14	ENSG00000143469	ENST00000637265.1	rs4844929	intron_variant	6.41831943484728e-07
chr1_209976344_G_C	SYT14	ENSG00000143469	ENST00000637265.1	rs144419411	intron_variant	1.62412502960639e-13
chr1_210078192_C_G	SYT14	ENSG00000143469	ENST00000637265.1	rs2473073	intron_variant	1.11621095842987e-07
chr1_210078296_C_T	SYT14	ENSG00000143469	ENST00000637265.1	rs2473071	intron_variant	0.00031753005804807
chr1_210083609_G_T	SYT14	ENSG00000143469	ENST00000637265.1	rs227169	intron_variant	0.000914776309845827
chr1_216555925_G_A	ESRRG	ENSG00000196482	ENST00000408911.8	rs4846531	intron_variant	0.0312101883249349
chr1_216940042_A_C	ESRRG	ENSG00000196482	ENST00000673908.1	rs7548001	intron_variant	0.0280601201146015
chr1_223965984_G_A	GTF2IP20	ENSG00000272645	ENST00000634905.2	rs9658945	intron_variant	0.000194863763564361
chr1_223965989_C_A	GTF2IP20	ENSG00000272645	ENST00000634905.2	rs9659831	intron_variant	7.25533393340735e-05
chr1_232031195_C_G	DISC1	ENSG00000162946	ENST00000439617.8	rs9661419	intron_variant	0.0137029774906395
chr1_232399913_T_C	SIPA1L2	ENSG00000116991	ENST00000674635.1	rs1110167	intron_variant	2.83785955766639e-07
chr1_232406813_A_G	SIPA1L2	ENSG00000116991	ENST00000674635.1	rs6687851	intron_variant	0.00115555661661701
chr1_232407749_G_A	SIPA1L2	ENSG00000116991	ENST00000674635.1	rs10910422	intron_variant	0.00113725385875737
chr1_232410891_A_G	SIPA1L2	ENSG00000116991	ENST00000674635.1	rs4649369	intron_variant	2.03613924589333e-08
chr1_232416566_A_G	SIPA1L2	ENSG00000116991	ENST00000674635.1	rs6701214	intron_variant	0.0321446879337567
chr1_235587316_T_G	GNG4	ENSG00000168243	ENST00000391854.7	rs13375859	intron_variant	0.00314344571285299
chr1_235635183_C_T	GNG4	ENSG00000168243	ENST00000391854.7	rs6429208	intron_variant	0.00522877996953885
chr1_235645008_G_A	GNG4	ENSG00000168243	ENST00000391854.7	rs1107302	intron_variant	0.000293456285159689
chr1_235645870_G_A	GNG4	ENSG00000168243	ENST00000391854.7	rs1891978	intron_variant	0.00103655683059473
chr1_235761962_A_G	LYST	ENSG00000143669	ENST00000389793.7	rs10754736	intron_variant	3.25031909030577e-16
chr1_236358278_A_G	EDARADD	ENSG00000186197	ENST00000637660.1	rs61835534	intron_variant	0.0415116149953459
chr1_236363426_C_A	EDARADD	ENSG00000186197	ENST00000637660.1	rs61833977	intron_variant	0.0429962356291234
chr1_237494999_C_A	RYR2	ENSG00000198626	ENST00000366574.7	rs2086210	intron_variant	0.0126312124060128
chr1_240493524_C_A	GREM2	ENSG00000180875	ENST00000318160.5	rs10926280	intron_variant	0.00650519214604696
chr1_241028052_T_C	RGS7	ENSG00000182901	ENST00000440928.6	rs616935	intron_variant	0.0179019832432004
chr1_241028226_C_G	RGS7	ENSG00000182901	ENST00000440928.6	rs478452	intron_variant	0.0263679999606633
chr1_241032706_C_G	RGS7	ENSG00000182901	ENST00000440928.6	rs527754	intron_variant	0.00401965237013104
chr1_241032989_C_T	RGS7	ENSG00000182901	ENST00000440928.6	rs785543	intron_variant	0.000262384520102419
chr1_241033035_C_T	RGS7	ENSG00000182901	ENST00000440928.6	rs785544	intron_variant	0.000482451527333115
chr1_241263397_G_A	RGS7	ENSG00000182901	ENST00000440928.6	rs10754723	intron_variant	0.0118545738143763
chr1_242382641_A_T	PLD5	ENSG00000180287	ENST00000536534.7	rs2153844	intron_variant	0.0391474772506838
chr1_242389572_A_G	PLD5	ENSG00000180287	ENST00000536534.7	rs2809977	intron_variant	0.027484648655817
chr1_242494115_C_G	PLD5	ENSG00000180287	ENST00000536534.7	rs7542808	intron_variant	0.00236400108575016
chr1_243041418_T_G	SEPTIN14P21	ENSG00000231512	ENST00000450226.2	rs77139711	intron_variant	0.0157839303350201
chr1_244423276_T_C	ADSS2	ENSG00000035687	ENST00000366535.4	rs3127458	intron_variant	1.28893956237991e-07
chr1_244986255_T_A	EFCAB2	ENSG00000203666	ENST00000366523.6	rs12409974	intron_variant	0.00111210547547048
chr1_246003007_C_T	SMYD3	ENSG00000185420	ENST00000490107.6	rs1538296	intron_variant	0.00111566451723956
chr1_246459512_C_T	SMYD3	ENSG00000185420	ENST00000490107.6	rs4654261	intron_variant	0.000136485386495253
chr1_246545544_G_A	TFB2M	ENSG00000162851	ENST00000366514.5	rs4545307	intron_variant	0.0134980280663796
chr1_246551535_T_C	TFB2M	ENSG00000162851	ENST00000366514.5	rs3124070	intron_variant	0.000196811634247449
chr1_246551563_G_A	TFB2M	ENSG00000162851	ENST00000366514.5	rs10737793	intron_variant	2.26753323555601e-05
chr1_246551584_C_T	TFB2M	ENSG00000162851	ENST00000366514.5	rs10737794	intron_variant	0.0190056021206224
chr1_246553215_C_T	TFB2M	ENSG00000162851	ENST00000366514.5	rs56177973	intron_variant	0.04466292296418
chr1_246949601_A_G	ZNF670ZNF695	ENSG00000135747	ENST00000465049.6	rs57434988	intron_variant	3.91899319913824e-05
chr1_247111597_A_G	LINC02897	ENSG00000221953	ENST00000623686.1	rs73135916	non_coding_transcript_exon_variant	0.00246250411039243
chr1_248650526_T_C	OR2T27	ENSG00000187701	ENST00000460972.4	rs1782241	missense_variant	1.34620258986202e-05
chr2_1451231_C_T	DIP2C	ENSG00000151240	ENST00000280886.12	rs7074221	intron_variant	0.0394935471610914
chr2_1473219_G_T	ADARB2	ENSG00000185736	ENST00000381312.6	rs10903416	intron_variant	0.0305718424953075
chr2_1482970_T_C	ADARB2	ENSG00000185736	ENST00000381312.6	rs3849974	intron_variant	0.0138691192560498
chr2_1483613_G_A	ADARB2	ENSG00000185736	ENST00000381312.6	rs3849975	intron_variant	0.0138691192560498
chr2_1483915_A_G	ADARB2	ENSG00000185736	ENST00000381312.6	rs2387640	intron_variant	0.0138691192560498
chr2_1484896_T_C	ADARB2	ENSG00000185736	ENST00000381312.6	rs2387641	intron_variant	0.0047221858248787
chr2_1529998_C_G	ADARB2	ENSG00000185736	ENST00000381312.6	rs2387642	intron_variant	0.000154414587807297
chr2_2645123_G_A	ADARB2	ENSG00000185736	ENST00000381312.6	rs2387643	intron_variant	0.00101358885777114
chr2_2789195_A_G	ADARB2	ENSG00000185736	ENST00000381312.6	rs2387644	intron_variant	0.00988345071267734
chr2_2789351_A_G	ADARB2	ENSG00000185736	ENST00000381312.6	rs2387645	intron_variant	0.00988345071267734
chr2_2789785_A_G	ADARB2	ENSG00000185736	ENST00000381312.6	rs2387646	intron_variant	0.0202357435383001
chr2_2790450_A_G	ADARB2	ENSG00000185736	ENST00000381312.6	rs2387647	intron_variant	0.00417210565567352
chr2_2791793_G_T	ADARB2	ENSG00000185736	ENST00000381312.6	rs2387648	intron_variant	0.0336968623368047
chr2_3043517_A_G	ADARB2	ENSG00000185736	ENST00000381312.6	rs4471349	intron_variant	1.2121515903244e-05
chr2_3866538_C_T	ADARB2	ENSG00000185736	ENST00000381312.6	rs4417195	intron_variant	0.0153168452545491
chr2_4287868_C_T	ADARB2	ENSG00000185736	ENST00000381312.6	rs12220554	intron_variant	0.0487528255809401
chr2_4288728_C_G	ADARB2	ENSG00000185736	ENST00000381312.6	rs12220555	intron_variant	0.0252206540944458
chr2_4288729_C_G	ADARB2	ENSG00000185736	ENST00000381312.6	rs12217329	intron_variant	0.0252206540944458
chr2_4290538_A_G	ADARB2	ENSG00000185736	ENST00000381312.6	rs12218307	intron_variant	0.000174065661628241
chr2_4290958_G_A	ADARB2	ENSG00000185736	ENST00000381312.6	rs12220563	intron_variant	0.0470748832545534
chr2_4293518_T_C	ADARB2	ENSG00000185736	ENST00000381312.6	rs12217541	intron_variant	0.0188359290827425
chr2_4293965_C_A	ADARB2	ENSG00000185736	ENST00000381312.6	rs61832043	intron_variant	0.00324307087703259
chr2_4294638_G_A	ADARB2	ENSG00000185736	ENST00000381312.6	rs11598727	intron_variant	0.0356350489478883
chr2_4296258_G_T	ADARB2	ENSG00000185736	ENST00000381312.6	rs10903417	intron_variant	0.0270005537841931
chr2_4297006_C_T	ADARB2	ENSG00000185736	ENST00000381312.6	rs10903418	intron_variant	0.0165602999458915
chr2_4323614_C_T	ADARB2	ENSG00000185736	ENST00000381312.6	rs10903419	intron_variant	0.000914776309845827
chr2_4324080_C_G	ADARB2	ENSG00000185736	ENST00000381312.6	rs11593264	intron_variant	0.000188506262818796
chr2_4325115_T_G	ADARB2	ENSG00000185736	ENST00000381312.6	rs11594721	intron_variant	9.72935622201844e-05
chr2_4334578_T_C	ADARB2	ENSG00000185736	ENST00000381312.6	rs35620030	intron_variant	0.00203255642149192
chr2_4334922_C_A	ADARB2	ENSG00000185736	ENST00000381312.6	rs56718200	intron_variant	0.00113362747698085
chr2_4335375_T_C	ADARB2	ENSG00000185736	ENST00000381312.6	rs58991694	intron_variant	0.00133803535314306
chr2_4342795_A_T	ADARB2	ENSG00000185736	ENST00000381312.6	rs12570479	intron_variant	0.00115187316918204
chr2_4345786_G_A	ADARB2	ENSG00000185736	ENST00000381312.6	rs10903420	intron_variant	0.000639759238183967
chr2_4779969_A_G	ADARB2	ENSG00000185736	ENST00000381312.6	rs10794736	intron_variant	1.87778112142057e-06
chr2_4843023_G_C	ADARB2	ENSG00000185736	ENST00000381312.6	rs10794737	intron_variant	0.0426203045098335
chr2_5197914_G_A	ADARB2	ENSG00000185736	ENST00000381312.6	rs4880815	intron_variant	0.0015485922386597
chr2_5783026_G_T	ADARB2	ENSG00000185736	ENST00000381312.6	rs4880816	intron_variant	0.0262899533486352
chr2_5783430_C_G	ADARB2	ENSG00000185736	ENST00000381312.6	rs4880818	intron_variant	0.0262899533486352
chr2_5783505_A_C	ADARB2	ENSG00000185736	ENST00000381312.6	rs200389664	intron_variant	0.0262899533486352
chr2_5786750_T_A	ADARB2	ENSG00000185736	ENST00000381312.6	rs4880819	intron_variant	0.0295943459365392
chr2_5999574_C_G	ADARB2	ENSG00000185736	ENST00000381312.6	rs61832045	intron_variant	2.90215287535991e-07
chr2_6019123_C_A	ADARB2	ENSG00000185736	ENST00000381312.6	rs61832046	intron_variant	0.0115013136209511
chr2_7189629_G_T	ADARB2	ENSG00000185736	ENST00000381312.6	rs4581371	intron_variant	0.00109447615127695
chr2_7200322_A_G	ADARB2	ENSG00000185736	ENST00000381312.6	rs4406751	intron_variant	0.00153879879144499
chr2_7203107_A_G	ADARB2	ENSG00000185736	ENST00000381312.6	rs4428997	intron_variant	0.00241655267257661
chr2_7223463_C_T	ADARB2	ENSG00000185736	ENST00000381312.6	rs10903425	intron_variant	0.00381295299250007
chr2_7224090_T_G	ADARB2	ENSG00000185736	ENST00000381312.6	rs11250399	intron_variant	0.00258115045765353
chr2_7228952_T_C	ADARB2	ENSG00000185736	ENST00000381312.6	rs142911052	intron_variant	0.00381295299250007
chr2_7229744_C_T	ADARB2	ENSG00000185736	ENST00000381312.6	rs1007147	intron_variant	0.00381295299250007
chr2_7230065_A_G	ADARB2	ENSG00000185736	ENST00000381312.6	rs1500964	intron_variant	0.00381295299250007
chr2_7231741_T_G	ADARB2	ENSG00000185736	ENST00000381312.6	rs4880496	intron_variant	0.00381295299250007
chr2_7234393_T_C	ADARB2	ENSG00000185736	ENST00000381312.6	rs4880498	intron_variant	0.00381295299250007
chr2_7234471_G_A	ADARB2	ENSG00000185736	ENST00000381312.6	rs11250461	intron_variant	0.00381295299250007
chr2_7237089_C_T	ADARB2	ENSG00000185736	ENST00000381312.6	rs11250469	intron_variant	0.00381295299250007
chr2_7237369_A_G	ADARB2	ENSG00000185736	ENST00000381312.6	rs11250475	intron_variant	0.00381295299250007
chr2_7238198_G_T	ADARB2	ENSG00000185736	ENST00000381312.6	rs11250476	intron_variant	0.00276532944130968
chr2_7491899_T_C	ADARB2	ENSG00000185736	ENST00000381312.6	rs12242493	intron_variant	0.00571748930155331
chr2_9301856_T_C	ADARB2	ENSG00000185736	ENST00000381312.6	rs11592576	intron_variant	0.000195510946358632
chr2_9407042_G_A	ADARB2	ENSG00000185736	ENST00000381312.6	rs4880915	intron_variant	7.22883770394244e-06
chr2_10563107_T_C	LINC02645	ENSG00000234170	ENST00000666064.1	rs10751872	intron_variant	0.00299023199442126
chr2_10567086_A_G	LINC02645	ENSG00000234170	ENST00000666064.1	rs10794909	intron_variant	0.000259802952148567
chr2_10567561_G_A	LINC02645	ENSG00000234170	ENST00000666064.1	rs10903762	intron_variant	0.00319287872798013
chr2_10567859_C_T	LINC02645	ENSG00000234170	ENST00000666064.1	rs9419513	intron_variant	0.00319287872798013
chr2_10569796_G_A	LINC02645	ENSG00000234170	ENST00000666064.1	rs9423540	intron_variant	0.00319287872798013
chr2_10570604_C_T	LINC02645	ENSG00000234170	ENST00000666064.1	rs9419515	intron_variant	0.000178754478647132
chr2_10576258_C_T	LINC02645	ENSG00000234170	ENST00000666064.1	rs754149	intron_variant	0.016911555462918
chr2_10578573_G_C	PFKP	ENSG00000067057	ENST00000381125.9	rs11251716	intron_variant	0.016911555462918
chr2_10603065_G_A	LINC00702	ENSG00000233117	ENST00000608792.1	rs12264756	intron_variant	0.000349208398002096
chr2_10603420_A_G	KIN	ENSG00000151657	ENST00000379562.9	rs7342066	3_prime_UTR_variant	0.000349208398002096
chr2_10603528_G_C	KIN	ENSG00000151657	ENST00000379562.9	rs2104575	3_prime_UTR_variant	0.000241616667345946
chr2_10603579_A_C	KIN	ENSG00000151657	ENST00000379562.9	rs1555961	intron_variant	0.000241616667345946
chr2_10603872_C_T	TAF3	ENSG00000165632	ENST00000344293.6	rs10752123	intron_variant	0.000349208398002096
chr2_10603925_C_T	TAF3	ENSG00000165632	ENST00000344293.6	rs10752124	intron_variant	0.000241616667345946
chr2_10604201_C_T	CELF2DT	ENSG00000270111	ENST00000670890.2	rs12356490	intron_variant	0.000349208398002096
chr2_10604748_G_A	CDC123	ENSG00000151465	ENST00000281141.9	rs7911095	intron_variant	0.000241616667345946
chr2_10604763_T_C	CAMK1D	ENSG00000183049	ENST00000619168.5	rs2724801	intron_variant	0.000241616667345946
chr2_10604804_C_T	CCDC3	ENSG00000151468	ENST00000378839.1	rs12773220	intron_variant	0.000241616667345946
chr2_10605006_A_C	FRMD4A	ENSG00000151474	ENST00000357447.7	rs7905831	intron_variant	0.000241616667345946
chr2_10605058_T_C	FRMD4A	ENSG00000151474	ENST00000357447.7	rs751497	intron_variant	0.000349208398002096
chr2_10605061_A_G	FRMD4A	ENSG00000151474	ENST00000357447.7	rs751498	intron_variant	0.000349208398002096
chr2_10605177_G_A	FRMD4A	ENSG00000151474	ENST00000357447.7	rs11258707	intron_variant	0.000349208398002096
chr2_10605348_A_G	FRMD4A	ENSG00000151474	ENST00000357447.7	rs10906533	intron_variant	0.000241616667345946
chr2_10605501_A_G	FRMD4A	ENSG00000151474	ENST00000357447.7	rs2698127	intron_variant	0.000349208398002096
chr2_10605592_C_G	FRMD4A	ENSG00000151474	ENST00000357447.7	rs11258710	intron_variant	0.000241616667345946
chr2_10605744_T_C	FRMD4A	ENSG00000151474	ENST00000357447.7	rs74228003	intron_variant	0.000241616667345946
chr2_10606000_A_G	FRMD4A	ENSG00000151474	ENST00000357447.7	rs1574584	intron_variant	0.000349208398002096
chr2_10606197_C_A	FRMD4A	ENSG00000151474	ENST00000357447.7	rs12764774	intron_variant	0.0044941411984356
chr2_10606215_T_C	FRMD4A	ENSG00000151474	ENST00000357447.7	rs2446595	intron_variant	0.000241616667345946
chr2_10606887_C_G	FRMD4A	ENSG00000151474	ENST00000357447.7	rs10906564	intron_variant	0.000241616667345946
chr2_10607081_A_G	FRMD4A	ENSG00000151474	ENST00000357447.7	rs12777331	intron_variant	0.000241616667345946
chr2_10607120_C_G	FRMD4A	ENSG00000151474	ENST00000357447.7	rs10906565	intron_variant	8.91415657067198e-05
chr2_10607145_A_G	FRMD4A	ENSG00000151474	ENST00000357447.7	rs10906566	intron_variant	0.000241616667345946
chr2_10607968_C_A	FRMD4A	ENSG00000151474	ENST00000357447.7	rs10906567	intron_variant	0.000349208398002096
chr2_10608131_T_C	FRMD4A	ENSG00000151474	ENST00000357447.7	rs10906568	intron_variant	0.000394146860117866
chr2_10608157_G_A	FRMD4A	ENSG00000151474	ENST00000357447.7	rs10508471	intron_variant	0.000241616667345946
chr2_10608217_G_T	FRMD4A	ENSG00000151474	ENST00000357447.7	rs11595071	intron_variant	0.000241616667345946
chr2_10608489_T_C	FRMD4A	ENSG00000151474	ENST00000357447.7	rs11596572	intron_variant	0.000241616667345946
chr2_10608684_A_G	FRMD4A	ENSG00000151474	ENST00000357447.7	rs11258795	intron_variant	0.000241616667345946
chr2_10608844_A_T	FRMD4A	ENSG00000151474	ENST00000357447.7	rs17315399	intron_variant	0.000241616667345946
chr2_10609233_G_C	FRMD4A	ENSG00000151474	ENST00000357447.7	rs11258797	intron_variant	0.000241616667345946
chr2_10609964_C_T	FRMD4A	ENSG00000151474	ENST00000357447.7	rs11258798	intron_variant	0.000241616667345946
chr2_10610177_A_G	FRMD4A	ENSG00000151474	ENST00000357447.7	rs999855	intron_variant	0.000241616667345946
chr2_10610229_T_C	FRMD4A	ENSG00000151474	ENST00000357447.7	rs10906571	intron_variant	0.000241616667345946
chr2_10610920_T_C	FRMD4A	ENSG00000151474	ENST00000357447.7	rs10906572	intron_variant	0.000241616667345946
chr2_10610936_T_C	FRMD4A	ENSG00000151474	ENST00000357447.7	rs11596719	intron_variant	0.000241616667345946
chr2_10611120_T_G	FRMD4A	ENSG00000151474	ENST00000357447.7	rs12779353	intron_variant	0.000241616667345946
chr2_10611281_C_T	FRMD4A	ENSG00000151474	ENST00000357447.7	rs11258834	intron_variant	0.000241616667345946
chr2_10611584_T_C	FRMD4A	ENSG00000151474	ENST00000357447.7	rs7907710	intron_variant	0.000241616667345946
chr2_10611610_G_A	FRMD4A	ENSG00000151474	ENST00000357447.7	rs11258846	intron_variant	0.000241616667345946
chr2_10612251_T_C	FRMD4A	ENSG00000151474	ENST00000357447.7	rs6602700	intron_variant	0.000241616667345946
chr2_10612300_A_C	FRMD4A	ENSG00000151474	ENST00000357447.7	rs1359731	intron_variant	0.000241616667345946
chr2_10612382_T_C	FRMD4A	ENSG00000151474	ENST00000357447.7	rs2926870	intron_variant	0.000241616667345946
chr2_10612538_C_T	FRMD4A	ENSG00000151474	ENST00000357447.7	rs2767289	intron_variant	0.000241616667345946
chr2_10613014_G_A	FRMD4A	ENSG00000151474	ENST00000357447.7	rs6602703	intron_variant	8.30493988870041e-05
chr2_10613197_C_T	FRMD4A	ENSG00000151474	ENST00000357447.7	rs2767288	intron_variant	3.83930563612252e-05
chr2_10613416_C_A	FRMD4A	ENSG00000151474	ENST00000357447.7	rs2767287	intron_variant	0.000241616667345946
chr2_10613561_A_T	FRMD4A	ENSG00000151474	ENST00000475141.2	rs653563	intron_variant	0.000241616667345946
chr2_10613645_C_T	FRMD4A	ENSG00000151474	ENST00000475141.2	rs11259067	intron_variant	0.000241616667345946
chr2_10613678_G_C	FRMD4A	ENSG00000151474	ENST00000475141.2	rs55976803	intron_variant	0.000241616667345946
chr2_10613718_A_G	FRMD4A	ENSG00000151474	ENST00000475141.2	rs1325897	intron_variant	0.000241616667345946
chr2_10614052_C_T	FAM107B	ENSG00000065809	ENST00000181796.7	rs2400089	intron_variant	0.000241616667345946
chr2_10614094_G_C	FAM107B	ENSG00000065809	ENST00000181796.7	rs10906742	intron_variant	0.000241616667345946
chr2_10614105_A_G	FAM107B	ENSG00000065809	ENST00000181796.7	rs7914588	intron_variant	0.000241616667345946
chr2_10614195_G_T	OLAH	ENSG00000152463	ENST00000378228.8	rs7099737	intron_variant	0.00299023199442126
chr2_10614249_A_C	FAM171A1	ENSG00000148468	ENST00000378116.9	rs4750625	intron_variant	0.000241616667345946
chr2_10614294_A_G	FAM171A1	ENSG00000148468	ENST00000378116.9	rs7083807	intron_variant	9.89429703222416e-05
chr2_10614406_C_T	FAM171A1	ENSG00000148468	ENST00000378116.9	rs56729289	intron_variant	0.000241616667345946
chr2_10614523_A_G	FAM171A1	ENSG00000148468	ENST00000378116.9	rs28654109	intron_variant	0.000241616667345946
chr2_10614537_T_C	FAM171A1	ENSG00000148468	ENST00000378116.9	rs17359814	intron_variant	0.000241616667345946
chr2_10614666_T_C	FAM171A1	ENSG00000148468	ENST00000378116.9	rs17294023	intron_variant	0.000167814742315366
chr2_10615412_T_C	FAM171A1	ENSG00000148468	ENST00000378116.9	rs11599615	intron_variant	0.000241616667345946
chr2_10615438_A_G	SLC39A12	ENSG00000148482	ENST00000377369.7	rs10508556	intron_variant	0.000241616667345946
chr2_10615457_G_A	CACNB2	ENSG00000165995	ENST00000324631.13	rs4293031	intron_variant	0.000241616667345946
chr2_10615470_A_G	CACNB2	ENSG00000165995	ENST00000324631.13	rs67214975	intron_variant	0.000241616667345946
chr2_10615597_C_A	CACNB2	ENSG00000165995	ENST00000324631.13	rs7918142	intron_variant	0.000241616667345946
chr2_10615653_A_G	CACNB2	ENSG00000165995	ENST00000324631.13	rs7076100	intron_variant	0.000241616667345946
chr2_10616510_G_A	CACNB2	ENSG00000165995	ENST00000324631.13	rs76260537	intron_variant	0.000241616667345946
chr2_10616524_T_C	CACNB2	ENSG00000165995	ENST00000324631.13	rs4418698	intron_variant	0.000241616667345946
chr2_10616539_C_G	CACNB2	ENSG00000165995	ENST00000324631.13	rs7897506	intron_variant	0.000241616667345946
chr2_10616975_A_G	CACNB2	ENSG00000165995	ENST00000324631.13	rs6482471	intron_variant	0.000241616667345946
chr2_10617006_G_A	CACNB2	ENSG00000165995	ENST00000324631.13	rs7097047	intron_variant	0.000241616667345946
chr2_10617353_T_C	CACNB2	ENSG00000165995	ENST00000324631.13	rs7069894	intron_variant	0.000241616667345946
chr2_10617431_T_C	CACNB2	ENSG00000165995	ENST00000324631.13	rs7067797	intron_variant	0.000241616667345946
chr2_10617551_C_T	CACNB2	ENSG00000165995	ENST00000324631.13	rs10828765	intron_variant	0.000241616667345946
chr2_10617712_T_C	CACNB2	ENSG00000165995	ENST00000324631.13	rs10828766	intron_variant	0.000241616667345946
chr2_10617903_T_C	MALRD1	ENSG00000204740	ENST00000454679.7	rs4748546	intron_variant	0.000241616667345946
chr2_10618245_T_A	MALRD1	ENSG00000204740	ENST00000454679.7	rs2358276	intron_variant	0.000152370173097836
chr2_10618449_G_A	MALRD1	ENSG00000204740	ENST00000454679.7	rs4408229	intron_variant	0.000241616667345946
chr2_10618531_T_C	MALRD1	ENSG00000204740	ENST00000454679.7	rs2358280	intron_variant	0.00031236032180002
chr2_10618733_C_T	MALRD1	ENSG00000204740	ENST00000454679.7	rs2358281	intron_variant	0.0417555368143749
chr2_10618846_T_C	MALRD1	ENSG00000204740	ENST00000454679.7	rs2358282	intron_variant	0.0112601633737927
chr2_10619000_G_A	MALRD1	ENSG00000204740	ENST00000454679.7	rs2358284	intron_variant	0.0417555368143749
chr2_10619008_C_T	MALRD1	ENSG00000204740	ENST00000454679.7	rs6481736	intron_variant	0.0417555368143749
chr2_10619023_T_G	MALRD1	ENSG00000204740	ENST00000454679.7	rs6481737	intron_variant	0.0417555368143749
chr2_10619153_T_G	MALRD1	ENSG00000204740	ENST00000454679.7	rs7090216	intron_variant	0.0114319041768692
chr2_10619247_C_T	MALRD1	ENSG00000204740	ENST00000454679.7	rs7074918	intron_variant	0.0417555368143749
chr2_10620776_T_C	MALRD1	ENSG00000204740	ENST00000454679.7	rs3858196	intron_variant	0.016911555462918
chr2_10621200_T_C	MALRD1	ENSG00000204740	ENST00000454679.7	rs2358285	intron_variant	0.00299023199442126
chr2_10621358_G_A	MALRD1	ENSG00000204740	ENST00000454679.7	rs4748547	intron_variant	0.000241616667345946
chr2_10621370_T_G	MALRD1	ENSG00000204740	ENST00000454679.7	rs4436459	intron_variant	0.000241616667345946
chr2_10622992_T_A	MALRD1	ENSG00000204740	ENST00000454679.7	rs4509661	intron_variant	0.00410790923858669
chr2_10623214_T_A	MALRD1	ENSG00000204740	ENST00000454679.7	rs4465279	intron_variant	0.000605516119690045
chr2_10623274_C_T	MALRD1	ENSG00000204740	ENST00000454679.7	rs58451235	intron_variant	0.000241616667345946
chr2_10623631_C_G	MALRD1	ENSG00000204740	ENST00000454679.7	rs7088261	intron_variant	0.00410790923858669
chr2_10623835_A_G	MALRD1	ENSG00000204740	ENST00000454679.7	rs2884422	intron_variant	0.00410790923858669
chr2_10629729_T_C	MALRD1	ENSG00000204740	ENST00000454679.7	rs2358286	intron_variant	0.00410790923858669
chr2_10630562_A_C	MALRD1	ENSG00000204740	ENST00000454679.7	rs2358288	intron_variant	0.00410790923858669
chr2_10631102_A_C	MALRD1	ENSG00000204740	ENST00000454679.7	rs2358289	intron_variant	0.00410790923858669
chr2_10633259_T_G	MALRD1	ENSG00000204740	ENST00000454679.7	rs2358293	intron_variant	7.30457720757405e-05
chr2_10633382_A_T	MALRD1	ENSG00000204740	ENST00000454679.7	rs12242151	intron_variant	7.30457720757405e-05
chr2_10641849_T_C	MALRD1	ENSG00000204740	ENST00000454679.7	rs2358295	intron_variant	0.000686897883060723
chr2_10656757_T_C	MALRD1	ENSG00000204740	ENST00000454679.7	rs4748549	intron_variant	0.000144454417992261
chr2_10663724_G_C	MALRD1	ENSG00000204740	ENST00000454679.7	rs10740840	intron_variant	0.000814854225453896
chr2_10663851_G_C	MALRD1	ENSG00000204740	ENST00000454679.7	rs4265498	intron_variant	3.38186907422829e-05
chr2_10665848_T_C	MALRD1	ENSG00000204740	ENST00000454679.7	rs2358297	intron_variant	0.000144454417992261
chr2_10673118_C_T	MALRD1	ENSG00000204740	ENST00000454679.7	rs2358298	intron_variant	0.0109241991007862
chr2_10681431_T_C	MALRD1	ENSG00000204740	ENST00000454679.7	rs2358299	intron_variant	8.80720078379515e-06
chr2_10686935_T_C	MALRD1	ENSG00000204740	ENST00000454679.7	rs10508574	intron_variant	4.49327653567368e-05
chr2_10687031_C_A	MALRD1	ENSG00000204740	ENST00000454679.7	rs2358300	intron_variant	0.000335741537798812
chr2_10688524_C_T	MALRD1	ENSG00000204740	ENST00000454679.7	rs2358301	intron_variant	0.000814854225453896
chr2_10692734_T_C	MALRD1	ENSG00000204740	ENST00000454679.7	rs2358302	intron_variant	0.00357191270927407
chr2_10698246_C_G	MALRD1	ENSG00000204740	ENST00000454679.7	rs2358305	intron_variant	1.31827734195938e-05
chr2_10698537_G_A	MALRD1	ENSG00000204740	ENST00000454679.7	rs755176	intron_variant	0.000148856070624604
chr2_10701676_A_G	MALRD1	ENSG00000204740	ENST00000454679.7	rs4353174	intron_variant	0.000362016697372009
chr2_10701896_T_A	MALRD1	ENSG00000204740	ENST00000454679.7	rs12264103	intron_variant	0.000362016697372009
chr2_10703684_C_T	MALRD1	ENSG00000204740	ENST00000454679.7	rs10763864	intron_variant	3.30155202170145e-05
chr2_10709186_C_T	MALRD1	ENSG00000204740	ENST00000454679.7	rs4748551	intron_variant	0.00170841480701023
chr2_10711877_C_T	MALRD1	ENSG00000204740	ENST00000454679.7	rs2358306	intron_variant	0.0225274505691164
chr2_10727144_A_G	MALRD1	ENSG00000204740	ENST00000454679.7	rs10740841	intron_variant	0.0412690810553696
chr2_10743710_C_A	MALRD1	ENSG00000204740	ENST00000454679.7	rs10826946	intron_variant	0.0290740710878643
chr2_11010460_T_A	MALRD1	ENSG00000204740	ENST00000454679.7	rs7085520	intron_variant	0.0126312124060128
chr2_11010461_G_A	MALRD1	ENSG00000204740	ENST00000454679.7	rs7069170	intron_variant	0.0126312124060128
chr2_12656499_A_G	MALRD1	ENSG00000204740	ENST00000454679.7	rs28791927	intron_variant	0.00437062981891072
chr2_13377331_G_A	PLXDC2	ENSG00000120594	ENST00000377252.5	rs2460599	intron_variant	4.43512933758218e-07
chr2_19511384_A_G	NEBL	ENSG00000078114	ENST00000417816.2	rs611992	intron_variant	0.00119684250740341
chr2_19586707_C_G	KIAA1217	ENSG00000120549	ENST00000376462.5	rs112995251	intron_variant	3.48245556247603e-09
chr2_19587956_T_C	KIAA1217	ENSG00000120549	ENST00000376462.5	rs144228566	intron_variant	0.000339059796979552
chr2_19590790_A_T	KIAA1217	ENSG00000120549	ENST00000376462.5	rs28367454	intron_variant	9.5899829995098e-08
chr2_22963100_G_A	MYO3A	ENSG00000095777	ENST00000642920.2	rs11014974	intron_variant	3.92392460856765e-07
chr2_22964632_C_A	ODAD2	ENSG00000169126	ENST00000305242.10	rs4494226	intron_variant	2.88363924657982e-06
chr2_22964656_A_G	ODAD2	ENSG00000169126	ENST00000305242.10	rs4600119	intron_variant	0.00175776092073286
chr2_22966110_C_T	ODAD2	ENSG00000169126	ENST00000305242.10	rs11596317	intron_variant	0.000411242505909194
chr2_22967843_T_C	ODAD2	ENSG00000169126	ENST00000305242.10	rs7907415	intron_variant	7.32932155637782e-05
chr2_22967921_G_A	ODAD2	ENSG00000169126	ENST00000305242.10	rs7907935	intron_variant	3.04641092221861e-07
chr2_22970159_C_G	ODAD2	ENSG00000169126	ENST00000305242.10	rs11598344	intron_variant	0.000233768090444435
chr2_22970394_C_G	ODAD2	ENSG00000169126	ENST00000305242.10	rs11006786	intron_variant	0.000233768090444435
chr2_22970417_C_G	ODAD2	ENSG00000169126	ENST00000305242.10	rs4749288	intron_variant	0.000233768090444435
chr2_22971059_G_A	ODAD2	ENSG00000169126	ENST00000305242.10	rs199871988	intron_variant	0.000240820339471996
chr2_22973368_A_C	PARD3	ENSG00000148498	ENST00000374788.8	rs1348105	intron_variant	0.00488548089842341
chr2_22973490_A_G	PARD3	ENSG00000148498	ENST00000374788.8	rs1095687	intron_variant	0.00488548089842341
chr2_22974023_A_G	PARD3	ENSG00000148498	ENST00000374788.8	rs626859	intron_variant	0.000359654197527627
chr2_22974701_T_A	PARD3	ENSG00000148498	ENST00000374788.8	rs626810	intron_variant	0.00488548089842341
chr2_22981208_C_G	PARD3	ENSG00000148498	ENST00000374788.8	rs2582854	intron_variant	0.00303731026671702
chr2_22984490_C_T	PARD3	ENSG00000148498	ENST00000374788.8	rs2256217	intron_variant	0.0113285555333301
chr2_22984825_G_C	PARD3	ENSG00000148498	ENST00000374788.8	rs2582855	intron_variant	0.00247801015533374
chr2_22992329_T_G	PARD3	ENSG00000148498	ENST00000374788.8	rs2786554	intron_variant	0.00135086891581901
chr2_24788650_T_C	PARD3	ENSG00000148498	ENST00000374788.8	rs11009705	intron_variant	1.01922768731959e-06
chr2_24839451_G_A	PARD3	ENSG00000148498	ENST00000374788.8	rs1660637	intron_variant	0.000226169364840423
chr2_25629545_A_T	PARD3	ENSG00000148498	ENST00000374788.8	rs1660638	intron_variant	4.66517057715379e-05
chr2_25630520_T_C	PARD3	ENSG00000148498	ENST00000374788.8	rs668752	intron_variant	4.66517057715379e-05
chr2_25631344_T_C	PARD3	ENSG00000148498	ENST00000374788.8	rs1441015	intron_variant	4.66517057715379e-05
chr2_25631626_T_C	PARD3	ENSG00000148498	ENST00000374788.8	rs661661	intron_variant	4.66517057715379e-05
chr2_25631864_T_C	PARD3	ENSG00000148498	ENST00000374788.8	rs1660614	intron_variant	4.66517057715379e-05
chr2_25632068_A_G	PARD3	ENSG00000148498	ENST00000374788.8	rs618808	intron_variant	4.66517057715379e-05
chr2_25633132_C_T	PARD3	ENSG00000148498	ENST00000374788.8	rs1660612	intron_variant	4.66517057715379e-05
chr2_25633212_G_C	PARD3	ENSG00000148498	ENST00000374788.8	rs1660611	intron_variant	4.66517057715379e-05
chr2_25633311_G_A	PARD3	ENSG00000148498	ENST00000374788.8	rs653496	intron_variant	7.15782167700974e-05
chr2_25633546_C_T	PARD3	ENSG00000148498	ENST00000374788.8	rs1441027	intron_variant	4.66517057715379e-05
chr2_25633847_G_A	PARD3	ENSG00000148498	ENST00000374788.8	rs2799448	intron_variant	0.00877778536790077
chr2_25633863_G_A	PARD3	ENSG00000148498	ENST00000374788.8	rs2007655	intron_variant	1.09118861473058e-10
chr2_25635230_C_T	PARD3	ENSG00000148498	ENST00000374788.8	rs2570335	intron_variant	0.000272066961573003
chr2_25636308_G_C	PARD3	ENSG00000148498	ENST00000374788.8	rs2582857	intron_variant	6.57683628927922e-05
chr2_25636979_C_T	PARD3	ENSG00000148498	ENST00000374788.8	rs1936426	intron_variant	0.000272066961573003
chr2_25637089_C_T	PARD3	ENSG00000148498	ENST00000374788.8	rs2804548	intron_variant	0.000272066961573003
chr2_25637451_C_T	PARD3	ENSG00000148498	ENST00000374788.8	rs1121908	intron_variant	5.84042909673503e-05
chr2_25640563_C_A	PARD3	ENSG00000148498	ENST00000374788.8	rs2799452	intron_variant	7.73658889836856e-05
chr2_25649300_T_C	PARD3	ENSG00000148498	ENST00000374788.8	rs2165413	intron_variant	0.000491960317715286
chr2_25649315_C_T	PARD3	ENSG00000148498	ENST00000374788.8	rs2570334	intron_variant	0.000491960317715286
chr2_25649335_G_A	PARD3	ENSG00000148498	ENST00000374788.8	rs2255021	intron_variant	5.84042909673503e-05
chr2_25650431_A_C	PARD3	ENSG00000148498	ENST00000374788.8	rs2255030	intron_variant	0.000121005188004945
chr2_25655818_G_T	PARD3	ENSG00000148498	ENST00000374788.8	rs1110654	intron_variant	1.22707653762996e-07
chr2_25664419_A_G	PARD3	ENSG00000148498	ENST00000374788.8	rs1121831	intron_variant	3.41300530300201e-06
chr2_25671381_C_T	PARD3	ENSG00000148498	ENST00000374788.8	rs1121829	intron_variant	0.00571748930155331
chr2_25673919_T_G	PARD3	ENSG00000148498	ENST00000374788.8	rs2570332	intron_variant	0.000104758549973249
chr2_26236420_G_A	PARD3	ENSG00000148498	ENST00000374788.8	rs2570331	intron_variant	0.0274033829806962
chr2_26326683_C_A	PLD5P1	ENSG00000283930	ENST00000640275.1	rs4579883	intron_variant	1.11892887592989e-10
chr2_26326801_C_G	SEPTIN7P9	ENSG00000120555	ENST00000604116.1	rs2754365	intron_variant	3.97238952644172e-09
chr2_26356829_T_C	SLC9B1P3	ENSG00000233867	ENST00000452667.2	rs4881617	intron_variant	2.1651433986833e-16
chr2_26357232_A_G	SLC9B1P3	ENSG00000233867	ENST00000452667.2	rs3931167	intron_variant	2.1651433986833e-16
chr2_26358335_C_T	SLC9B1P3	ENSG00000233867	ENST00000452667.2	rs7909955	intron_variant	2.1651433986833e-16
chr2_26366607_T_C	RASGEF1A	ENSG00000198915	ENST00000395810.6	rs7915431	intron_variant	2.48128270417485e-18
chr2_26370003_T_C	PARGP1	ENSG00000239883	ENST00000417555.2	rs1369918193	intron_variant	7.76276691785147e-05
chr2_26371270_G_A	GLUD1P2	ENSG00000265366	ENST00000631118.2	rs1465873535	intron_variant	9.56123983180513e-17
chr2_26371309_C_T	BMS1P1	ENSG00000204177	ENST00000374336.5	rs878979632	non_coding_transcript_exon_variant	9.56123983180513e-17
chr2_26371642_C_T	BMS1P1	ENSG00000204177	ENST00000580094.5	rs199640656	intron_variant	2.06002213160703e-17
chr2_26372265_A_G	BMS1P1	ENSG00000204177	ENST00000580094.5	rs77186552	intron_variant	0.0214153707944875
chr2_26374709_C_T	BMS1P1	ENSG00000204177	ENST00000580094.5	rs1319881402	non_coding_transcript_exon_variant	3.06473888325699e-11
chr2_26376970_G_A	AGAP13P	ENSG00000243289	ENST00000417888.2	rs76987086	intron_variant	3.34346517759535e-22
chr2_26378619_G_A	AGAP13P	ENSG00000243289	ENST00000417888.2	rs79848466	intron_variant	4.28820243747871e-10
chr2_26402174_C_A	FAM25C	ENSG00000276430	ENST00000617224.3	rs11100980	intron_variant	2.4469271250521e-10
chr2_26405683_C_T	WDFY4	ENSG00000128815	ENST00000325239.12	rs2250389	intron_variant	0.00506991052531487
chr2_26408300_C_T	WDFY4	ENSG00000128815	ENST00000325239.12	rs7919656	intron_variant	2.22451101324232e-10
chr2_26411444_C_G	WDFY4	ENSG00000128815	ENST00000325239.12	rs2620891	intron_variant	0.000709432198578122
chr2_26412574_G_A	WDFY4	ENSG00000128815	ENST00000325239.12	rs10776647	intron_variant	0.00744388193487444
chr2_26418603_A_T	WDFY4	ENSG00000128815	ENST00000325239.12	rs10776648	intron_variant	2.97801361446819e-05
chr2_26430589_G_A	WDFY4	ENSG00000128815	ENST00000325239.12	rs2663051	intron_variant	5.04568553104155e-05
chr2_26438070_C_T	WDFY4	ENSG00000128815	ENST00000325239.12	rs11101529	intron_variant	0.0238370107064596
chr2_26445922_G_T	WDFY4	ENSG00000128815	ENST00000325239.12	rs3747874	synonymous_variant	4.81702457804848e-20
chr2_26447115_A_T	WDFY4	ENSG00000128815	ENST00000325239.12	rs2620898	intron_variant	4.81702457804848e-20
chr2_26515032_C_A	WDFY4	ENSG00000128815	ENST00000325239.12	rs2448545	intron_variant	6.61727517952739e-06
chr2_28658377_A_C	WDFY4	ENSG00000128815	ENST00000325239.12	rs2620904	intron_variant	9.51737725134183e-08
chr2_28921132_T_A	WDFY4	ENSG00000128815	ENST00000325239.12	rs2940727	intron_variant	0.0297697782110256
chr2_29095211_A_G	PARG	ENSG00000227345	ENST00000616448.2	rs8474	3_prime_UTR_variant	0.0474890193554119
chr2_29216844_A_G	PARG	ENSG00000227345	ENST00000616448.2	rs11101238	intron_variant	0.00484040698210933
chr2_29391305_T_G	PARG	ENSG00000227345	ENST00000616448.2	rs1438928	intron_variant	5.62615292012554e-05
chr2_29520867_T_C	PARG	ENSG00000227345	ENST00000616448.2	rs1438929	intron_variant	0.000513196275619437
chr2_29520956_C_G	PARG	ENSG00000227345	ENST00000616448.2	rs3793805	intron_variant	0.000513196275619437
chr2_29590983_A_C	PARG	ENSG00000227345	ENST00000616448.2	rs3849145	intron_variant	0.00200076370724825
chr2_31017460_C_G	PARG	ENSG00000227345	ENST00000616448.2	rs2579036	intron_variant	0.00126350041846146
chr2_31066723_G_A	PARG	ENSG00000227345	ENST00000616448.2	rs2573492	intron_variant	0.0137443300384351
chr2_31067158_T_C	PARG	ENSG00000227345	ENST00000616448.2	rs4390270	intron_variant	0.0429962356291234
chr2_31069849_C_T	PARG	ENSG00000227345	ENST00000616448.2	rs6537554	intron_variant	0.0160708176162352
chr2_31072178_C_T	PARG	ENSG00000227345	ENST00000616448.2	rs7075365	intron_variant	0.000761583704938561
chr2_31073293_T_C	PARG	ENSG00000227345	ENST00000616448.2	rs2664655	intron_variant	0.000323844398979357
chr2_31074167_G_A	PARG	ENSG00000227345	ENST00000616448.2	rs3829175	intron_variant	0.000580546690504103
chr2_31074426_A_G	PARG	ENSG00000227345	ENST00000616448.2	rs7905981	intron_variant	0.0018783829265455
chr2_31074561_T_G	PARG	ENSG00000227345	ENST00000616448.2	rs10857546	intron_variant	0.000799272923404315
chr2_31075345_A_C	TIMM23B	ENSG00000204152	ENST00000651259.3	rs1364581393	intron_variant	0.0139109606851557
chr2_31075868_A_G	TIMM23B	ENSG00000204152	ENST00000651259.3	rs879860215	intron_variant	0.000220265038010173
chr2_31077933_G_A	TIMM23B	ENSG00000204152	ENST00000651259.3	rs2490916	intron_variant	0.000323844398979357
chr2_31078689_G_A	TIMM23B	ENSG00000204152	ENST00000651259.3	rs7098724	intron_variant	0.000357306793132052
chr2_31079814_C_T	TIMM23BAGAP6	ENSG00000178440	ENST00000311652.10	rs61848260	missense_variant	0.000176981850300307
chr2_31080407_T_A	TIMM23BAGAP6	ENSG00000178440	ENST00000311652.10	rs61848264	intron_variant	0.000938557807726811
chr2_31081148_C_A	TIMM23BAGAP6	ENSG00000178440	ENST00000311652.10	rs4043242	intron_variant	2.47217759065955e-05
chr2_31081281_T_C	TIMM23BAGAP6	ENSG00000178440	ENST00000311652.10	rs61848274	intron_variant	1.55318816997775e-05
chr2_31087021_G_A	FAM21EP	ENSG00000235618	ENST00000456967.5	rs879968243	intron_variant	4.29812501999578e-05
chr2_31088202_G_A	WASHC2A	ENSG00000099290	ENST00000282633.10	rs2669712	intron_variant	8.9320780555004e-06
chr2_31088487_T_C	WASHC2A	ENSG00000099290	ENST00000282633.10	rs201420666	intron_variant	3.43753300904696e-06
chr2_31088682_T_C	SGMS1	ENSG00000198964	ENST00000361781.7	rs3011777	intron_variant	3.43753300904696e-06
chr2_31088829_G_A	PRKG1	ENSG00000185532	ENST00000373980.11	rs2447652	intron_variant	3.43753300904696e-06
chr2_31105785_C_T	ANK3	ENSG00000151150	ENST00000280772.7	rs3044573	intron_variant	0.000112406464195164
chr2_31105807_G_A	ANK3	ENSG00000151150	ENST00000373827.6	rs10761518	intron_variant	0.000148856070624604
chr2_32578951_G_A	RHOBTB1	ENSG00000072422	ENST00000357917.4	rs1864757	intron_variant	0.0127461357526273
chr2_34767976_T_C	ARID5B	ENSG00000150347	ENST00000279873.12	rs10761602	intron_variant	0.0465281681929488
chr2_34781328_G_A	ARID5B	ENSG00000150347	ENST00000279873.12	rs10761603	intron_variant	0.000538815369008948
chr2_35213295_A_G	ARID5B	ENSG00000150347	ENST00000279873.12	rs10821952	intron_variant	0.0368063452442805
chr2_36197997_C_T	ARID5B	ENSG00000150347	ENST00000279873.12	rs10995021	intron_variant	0.000509871771930845
chr2_36223809_A_G	ARID5B	ENSG00000150347	ENST00000279873.12	rs10761604	intron_variant	0.0178484742919198
chr2_36235771_A_G	ARID5B	ENSG00000150347	ENST00000279873.12	rs4948499	intron_variant	0.0100042534359762
chr2_36236439_A_T	ARID5B	ENSG00000150347	ENST00000279873.12	rs10821955	intron_variant	0.00194475719847479
chr2_37868479_G_A	CTNNA3	ENSG00000183230	ENST00000433211.7	rs3858140	intron_variant	0.00198192192814585
chr2_37878903_C_T	CTNNA3	ENSG00000183230	ENST00000433211.7	rs2394264	intron_variant	0.0145974067213944
chr2_37887996_T_C	CTNNA3	ENSG00000183230	ENST00000433211.7	rs10740247	intron_variant	7.27991475505065e-05
chr2_41818187_C_G	CTNNA3	ENSG00000183230	ENST00000433211.7	rs10762093	intron_variant	0.0358452764407933
chr2_41843295_A_G	CTNNA3	ENSG00000183230	ENST00000433211.7	rs2394297	intron_variant	0.0241220142409771
chr2_41843710_C_T	CTNNA3	ENSG00000183230	ENST00000433211.7	rs4411188	intron_variant	0.0388043614977757
chr2_45148839_C_T	CDH23	ENSG00000107736	ENST00000224721.12	rs10823785	intron_variant	0.00204541129326825
chr2_45183783_C_T	KCNMA1	ENSG00000156113	ENST00000286628.14	rs10824466	intron_variant	0.00392105391892047
chr2_45788712_T_G	KCNMA1	ENSG00000156113	ENST00000286628.14	rs1907740	intron_variant	6.18674649601229e-06
chr2_46091137_G_T	KCNMA1	ENSG00000156113	ENST00000286628.14	rs686374	intron_variant	7.61307229992066e-09
chr2_46370731_T_C	KCNMA1	ENSG00000156113	ENST00000286628.14	rs176287	intron_variant	0.026524771100463
chr2_46371094_G_A	KCNMA1	ENSG00000156113	ENST00000286628.14	rs166994	intron_variant	0.00532642385925275
chr2_46373755_T_C	KCNMA1	ENSG00000156113	ENST00000286628.14	rs172291	intron_variant	0.0496134926605978
chr2_46375112_G_A	KCNMA1	ENSG00000156113	ENST00000286628.14	rs176286	intron_variant	0.0359508427176372
chr2_46375583_T_C	KCNMA1	ENSG00000156113	ENST00000286628.14	rs176285	intron_variant	0.0139529252108894
chr2_46381403_C_G	KCNMA1	ENSG00000156113	ENST00000286628.14	rs843836	intron_variant	0.0332041269358012
chr2_46382827_A_T	KCNMA1	ENSG00000156113	ENST00000286628.14	rs603674	intron_variant	0.0173218890387142
chr2_46395106_T_C	KCNMA1	ENSG00000156113	ENST00000286628.14	rs605089	intron_variant	0.0458534631492686
chr2_46395334_C_T	KCNMA1	ENSG00000156113	ENST00000286628.14	rs287184	intron_variant	0.0262121318635913
chr2_46397233_C_A	DLG5	ENSG00000151208	ENST00000372391.7	rs55893027	intron_variant	0.0284783418529644
chr2_46404944_C_T	ZMIZ1AS1	ENSG00000224596	ENST00000456353.5	rs10762831	intron_variant	0.0382390002130878
chr2_46406791_G_A	ZMIZ1AS1	ENSG00000224596	ENST00000456353.5	rs10824698	intron_variant	0.00115555661661701
chr2_46408042_G_A	ZMIZ1AS1	ENSG00000224596	ENST00000456353.5	rs2275283	intron_variant	1.81638453281827e-05
chr2_46815734_G_A	ZMIZ1AS1	ENSG00000224596	ENST00000456353.5	rs1060628	intron_variant	2.36173129754532e-09
chr2_46818128_G_A	CTSLP6	ENSG00000204437	ENST00000458273.2	rs2260034	non_coding_transcript_exon_variant	4.12537686534937e-05
chr2_47022100_A_G	PGGT1BP2	ENSG00000214584	ENST00000398621.3	rs2758538	non_coding_transcript_exon_variant	8.44618046197008e-05
chr2_48905411_C_T	SFTPD	ENSG00000133661	ENST00000372292.8	rs2255601	intron_variant	0.00120066651352475
chr2_48908199_G_A	SFTPD	ENSG00000133661	ENST00000372292.8	rs2819096	intron_variant	0.0486108015242356
chr2_50031537_T_A	SFTPD	ENSG00000133661	ENST00000444384.3	rs61858837	intron_variant	0.000463970472489254
chr2_50031664_T_C	SFTPD	ENSG00000133661	ENST00000444384.3	rs2264953	intron_variant	0.0123669741822196
chr2_50035248_C_A	SFTPD	ENSG00000133661	ENST00000444384.3	rs4433518	intron_variant	5.09750907508731e-05
chr2_50035264_T_C	SFTPD	ENSG00000133661	ENST00000444384.3	rs28795071	intron_variant	0.00354974846143149
chr2_50035834_T_C	SFTPD	ENSG00000133661	ENST00000444384.3	rs7097276	intron_variant	0.00354974846143149
chr2_50036707_G_A	SFTPD	ENSG00000133661	ENST00000444384.3	rs7071426	intron_variant	9.38299077433583e-06
chr2_50039236_A_T	SFTPD	ENSG00000133661	ENST00000444384.3	rs7084714	intron_variant	0.000152878776796524
chr2_50039707_T_C	SFTPD	ENSG00000133661	ENST00000444384.3	rs2247820	intron_variant	0.0436299748348744
chr2_50040004_T_C	SFTPD	ENSG00000133661	ENST00000444384.3	rs2758588	intron_variant	0.0436299748348744
chr2_50206159_C_T	SFTPD	ENSG00000133661	ENST00000444384.3	rs2265959	intron_variant	0.000929569715055719
chr2_50211871_C_A	SFTPDAS1	ENSG00000273372	ENST00000608229.1	rs2758549	non_coding_transcript_exon_variant	0.00215115098150397
chr2_50225888_T_G	SFTPDAS1	ENSG00000273372	ENST00000608229.1	rs1304463	non_coding_transcript_exon_variant	0.0246287816182211
chr2_50238672_T_A	SFTPDAS1	ENSG00000273372	ENST00000608229.1	rs2819121	non_coding_transcript_exon_variant	0.00131272485602789
chr2_50252350_T_C	SFTPD	ENSG00000133661	ENST00000444384.3	rs10788338	intron_variant	0.00679057865234555
chr2_51327611_A_G	SFTPD	ENSG00000133661	ENST00000444384.3	rs7476563	intron_variant	0.00386063362813044
chr2_52054313_C_T	SFTPD	ENSG00000133661	ENST00000444384.3	rs4319455	intron_variant	0.0126694074383917
chr2_54265534_C_T	SFTPD	ENSG00000133661	ENST00000444384.3	rs11201011	intron_variant	0.00213764695607551
chr2_54714814_G_A	SFTPD	ENSG00000133661	ENST00000444384.3	rs7903576	intron_variant	0.0300348278933523
chr2_54849304_T_C	SFTPD	ENSG00000133661	ENST00000444384.3	rs10159532	intron_variant	9.99457363587664e-05
chr2_60248122_G_A	TMEM254AS1	ENSG00000230091	ENST00000412298.5	rs7083563	intron_variant	0.00408250168397783
chr2_61890769_G_A	NRG3	ENSG00000185737	ENST00000372141.7	rs9325543	intron_variant	0.0342975522074024
chr2_62490571_A_G	CTSLP1	ENSG00000236417	ENST00000457530.1	rs3120081	non_coding_transcript_exon_variant	0.00521267680817745
chr2_62492906_T_C	PAPSS2	ENSG00000198682	ENST00000456849.2	rs3824722	intron_variant	8.64787989851625e-05
chr2_62493549_C_T	LIPK	ENSG00000204021	ENST00000404190.3	rs442131	intron_variant	0.0104385141796025
chr2_62495041_C_A	STAMBPL1	ENSG00000138134	ENST00000371927.7	rs7088326	intron_variant	0.0198765681443724
chr2_64142202_A_C	STAMBPL1	ENSG00000138134	ENST00000371927.7	rs12146231	3_prime_UTR_variant	0.0477670786139574
chr2_64984643_T_C	LIPA	ENSG00000107798	ENST00000371837.5	rs10749602	intron_variant	4.66517057715379e-05
chr2_66017022_T_G	SLC16A12	ENSG00000152779	ENST00000371790.5	rs11203129	intron_variant	0.0404310313752412
chr2_67172297_T_G	SLC16A12	ENSG00000152779	ENST00000371790.5	rs10788644	intron_variant	0.0111921740504964
chr2_67172375_G_A	SLC16A12	ENSG00000152779	ENST00000371790.5	rs2026913	intron_variant	0.00864507225792879
chr2_67181225_T_G	PANK1	ENSG00000152782	ENST00000307534.10	rs943130	intron_variant	0.00735335488664146
chr2_67181858_G_A	PANK1	ENSG00000152782	ENST00000307534.10	rs1359623	intron_variant	0.000114306536201296
chr2_67202014_T_C	PANK1AS1	ENSG00000232936	ENST00000660192.1	rs4933509	non_coding_transcript_exon_variant	0.00272237500509802
chr2_67203391_A_G	CPEB3	ENSG00000107864	ENST00000265997.5	rs6583805	intron_variant	0.0487528255809401
chr2_67204724_T_C	MARCHF5	ENSG00000198060	ENST00000358935.3	rs61126515	intron_variant	0.00506991052531487
chr2_67205274_G_A	MYOF	ENSG00000138119	ENST00000359263.9	rs2761328	intron_variant	0.00134229990515228
chr2_69499022_T_C	SORBS1	ENSG00000095637	ENST00000371247.7	rs6583992	intron_variant	0.00148600755524543
chr2_69499702_T_A	SORBS1	ENSG00000095637	ENST00000371247.7	rs35204215	intron_variant	0.00345166060867334
chr2_69501020_C_T	SORBS1	ENSG00000095637	ENST00000371247.7	rs1410058	intron_variant	0.0329118622877931
chr2_69505122_T_C	SORBS1	ENSG00000095637	ENST00000371247.7	rs4918921	intron_variant	0.02724155342919
chr2_69723640_G_C	SORBS1	ENSG00000095637	ENST00000371247.7	rs1536556	intron_variant	0.00374250865909471
chr2_69727255_G_A	SORBS1	ENSG00000095637	ENST00000371247.7	rs11188303	intron_variant	0.0187236350754876
chr2_69728628_T_G	SORBS1	ENSG00000095637	ENST00000371247.7	rs4918922	intron_variant	0.0400769623503586
chr2_69730080_A_C	SORBS1	ENSG00000095637	ENST00000371247.7	rs10882587	intron_variant	0.0187236350754876
chr2_69731812_G_C	SORBS1	ENSG00000095637	ENST00000371247.7	rs2274490	synonymous_variant	0.0187236350754876
chr2_69731873_G_C	SORBS1	ENSG00000095637	ENST00000371247.7	rs55688714	intron_variant	0.0187236350754876
chr2_69734380_G_C	SORBS1	ENSG00000095637	ENST00000371247.7	rs11188311	intron_variant	0.0423714640740707
chr2_69735008_C_G	SORBS1	ENSG00000095637	ENST00000371247.7	rs2182588	intron_variant	0.0423714640740707
chr2_69735914_A_G	HOGA1	ENSG00000241935	ENST00000370646.9	rs2861970	intron_variant	0.0128233172264248
chr2_69739157_C_T	BTRC	ENSG00000166167	ENST00000370187.8	rs4301726	intron_variant	0.0292464979851996
chr2_69739386_T_A	DPCD	ENSG00000166171	ENST00000470165.1	rs4919559	intron_variant	0.0292464979851996
chr2_69742786_C_A	SH3PXD2A	ENSG00000107957	ENST00000369774.9	rs10786765	intron_variant	0.0413901750211331
chr2_69841503_G_T	SORCS1	ENSG00000108018	ENST00000263054.11	rs10884374	intron_variant	0.0163627870518893
chr2_69846571_C_T	SORCS1	ENSG00000108018	ENST00000263054.11	rs12355634	intron_variant	0.0118187768905434
chr2_69849822_A_T	LINC01435	ENSG00000229981	ENST00000630847.2	rs10884521	intron_variant	0.0118187768905434
chr2_75154186_G_A	XPNPEP1	ENSG00000108039	ENST00000502935.6	rs1245843	intron_variant	0.0420008542288606
chr2_75416118_C_A	ADD3	ENSG00000148700	ENST00000356080.9	rs3932612	intron_variant	0.0104702269774531
chr2_78049124_G_A	TCF7L2	ENSG00000148737	ENST00000627217.3	rs290476	intron_variant	0.0111921740504964
chr2_78057835_T_G	TCF7L2	ENSG00000148737	ENST00000627217.3	rs290474	intron_variant	0.0127461357526273
chr2_79084625_A_T	VWA2	ENSG00000165816	ENST00000392982.8	rs597371	missense_variant	0.0283942145282311
chr2_80034044_C_T	AFAP1L2	ENSG00000169129	ENST00000304129.9	rs4751648	intron_variant	0.000686897883060723
chr2_80045470_C_T	AFAP1L2	ENSG00000169129	ENST00000304129.9	rs496783	intron_variant	0.0370233000086468
chr2_80045544_C_T	AFAP1L2	ENSG00000169129	ENST00000304129.9	rs646668	intron_variant	0.0107925691766042
chr2_80052936_C_T	AFAP1L2	ENSG00000169129	ENST00000304129.9	rs4751671	intron_variant	0.0210985997791882
chr2_80058487_C_T	AFAP1L2	ENSG00000169129	ENST00000304129.9	rs515392	intron_variant	0.0273223514571827
chr2_80293073_T_G	AFAP1L2	ENSG00000169129	ENST00000304129.9	rs648015	intron_variant	0.013538777326621
chr2_80294216_C_T	AFAP1L2	ENSG00000169129	ENST00000304129.9	rs2004220	intron_variant	0.00045351175867962
chr2_80294606_A_G	ABLIM1	ENSG00000099204	ENST00000533213.7	rs1064266	3_prime_UTR_variant	0.000871764276030328
chr2_80295354_A_G	ABLIM1	ENSG00000099204	ENST00000533213.7	rs4751906	3_prime_UTR_variant	0.00360541275264728
chr2_80297159_C_T	ABLIM1	ENSG00000099204	ENST00000533213.7	rs4751909	intron_variant	0.0412690810553696
chr2_82060629_A_C	ABLIM1	ENSG00000099204	ENST00000533213.7	rs10160093	intron_variant	4.60258711433718e-07
chr2_82186919_G_A	ABLIM1	ENSG00000099204	ENST00000533213.7	rs7080135	intron_variant	0.00232714967114578
chr2_83349023_G_A	ABLIM1	ENSG00000099204	ENST00000533213.7	rs7093929	intron_variant	6.89708818654609e-09
chr2_85431134_C_G	HSPA12A	ENSG00000165868	ENST00000635765.1	rs1665668	intron_variant	0.000153900978822401
chr2_86167440_T_C	HSPA12A	ENSG00000165868	ENST00000635765.1	rs758363	intron_variant	0.00046548371595528
chr2_86197538_T_C	HSPA12A	ENSG00000165868	ENST00000635765.1	rs1900502	intron_variant	0.000194863763564361
chr2_87094313_T_C	HSPA12A	ENSG00000165868	ENST00000635765.1	rs7087521	intron_variant	0.0427452578340207
chr2_87288234_C_A	HSPA12A	ENSG00000165868	ENST00000635765.1	rs1900501	intron_variant	2.58564541201342e-05
chr2_87294443_A_G	HSPA12A	ENSG00000165868	ENST00000635765.1	rs1622217	intron_variant	4.71315929914112e-05
chr2_87493722_C_T	HSPA12A	ENSG00000165868	ENST00000635765.1	rs4331011	intron_variant	4.80070244496747e-13
chr2_87521801_C_T	HSPA12A	ENSG00000165868	ENST00000635765.1	rs10787729	intron_variant	0.0119626003111216
chr2_87933617_T_C	HSPA12A	ENSG00000165868	ENST00000635765.1	rs4751612	intron_variant	4.41372136219467e-08
chr2_100605168_A_G	HSPA12A	ENSG00000165868	ENST00000635765.1	rs880903	intron_variant	1.2114462223181e-10
chr2_101049367_G_A	HSPA12A	ENSG00000165868	ENST00000635765.1	rs2014780	intron_variant	0.00479573921746846
chr2_101678032_C_T	EIF3A	ENSG00000107581	ENST00000369144.8	rs4259754	intron_variant	0.0141646066598167
chr2_102078601_A_C	DENND10	ENSG00000119979	ENST00000361432.3	rs11198791	intron_variant	0.0215433730370569
chr2_104018392_A_G	ATE1	ENSG00000107669	ENST00000224652.12	rs142531540	intron_variant	0.00134657774590348
chr2_106299434_A_T	BTBD16	ENSG00000138152	ENST00000260723.6	rs7086403	intron_variant	3.57271614510135e-05
chr2_106569197_G_T	BTBD16	ENSG00000138152	ENST00000260723.6	rs7090214	intron_variant	0.00136816769977192
chr2_106578564_T_C	BTBD16	ENSG00000138152	ENST00000260723.6	rs4752678	intron_variant	0.00421109269493315
chr2_106580964_C_T	HTRA1	ENSG00000166033	ENST00000368984.8	rs28479771	intron_variant	0.0104702269774531
chr2_106610675_A_C	HTRA1	ENSG00000166033	ENST00000368984.8	rs28637696	intron_variant	8.1513426456497e-07
chr2_107869445_G_A	HTRA1	ENSG00000166033	ENST00000368984.8	rs2268356	intron_variant	0.00059194325992699
chr2_108142916_A_C	HTRA1	ENSG00000166033	ENST00000368984.8	rs28414499	intron_variant	8.30227608832198e-07
chr2_109133919_G_A	HTRA1	ENSG00000166033	ENST00000368984.8	rs2672584	intron_variant	2.44669469834219e-05
chr2_109136925_C_T	HTRA1	ENSG00000166033	ENST00000368984.8	rs28542373	intron_variant	2.44669469834219e-05
chr2_109521331_C_T	DMBT1L1	ENSG00000176584	ENST00000636837.3	rs1539065	intron_variant	0.0116061992001902
chr2_109525639_A_C	DMBT1L1	ENSG00000176584	ENST00000636837.3	rs1539064	intron_variant	0.0303918064457642
chr2_109528722_G_A	DMBT1L1	ENSG00000176584	ENST00000636837.3	rs1341386	intron_variant	0.00445259672413216
chr2_109529109_G_A	DMBT1L1	ENSG00000176584	ENST00000636837.3	rs7916492	intron_variant	0.00687433805426635
chr2_109532407_C_G	DMBT1L1	ENSG00000176584	ENST00000636837.3	rs7081482	intron_variant	0.0109241991007862
chr2_113574198_C_T	LHPP	ENSG00000107902	ENST00000368842.10	rs60441558	intron_variant	0.000155446848490288
chr2_113581189_C_A	CTBP2	ENSG00000175029	ENST00000337195.9	rs3012070	intron_variant	2.98904680678424e-06
chr2_113627286_T_C	C10orf90	ENSG00000154493	ENST00000488181.3	rs4962584	intron_variant	1.10663863632492e-05
chr2_114514493_G_A	C10orf90	ENSG00000154493	ENST00000488181.3	rs4962585	intron_variant	0.000443283908654286
chr2_114732621_G_A	C10orf90	ENSG00000154493	ENST00000488181.3	rs1436789	intron_variant	0.00190827391717675
chr2_114773146_G_A	C10orf90	ENSG00000154493	ENST00000488181.3	rs11245076	intron_variant	0.0162648938471932
chr2_115734793_C_T	C10orf90	ENSG00000154493	ENST00000488181.3	rs7478429	intron_variant	0.0462571340665024
chr2_116049387_C_A	C10orf90	ENSG00000154493	ENST00000488181.3	rs10794097	intron_variant	2.99011090421428e-07
chr2_119262034_T_C	DOCK1	ENSG00000150760	ENST00000623213.2	rs1185227	intron_variant	1.91348428217339e-05
chr2_119263743_C_T	DOCK1	ENSG00000150760	ENST00000623213.2	rs7074361	intron_variant	0.0320500248053341
chr2_119264809_C_T	DOCK1	ENSG00000150760	ENST00000623213.2	rs1186361	intron_variant	0.00182572821322039
chr2_119267289_A_G	MGMT	ENSG00000170430	ENST00000651593.1	rs562240	intron_variant	0.0147741142650868
chr2_119267471_C_G	LINC02646	ENSG00000236303	ENST00000648275.1	rs10829726	intron_variant	5.29203241511942e-05
chr2_119706317_C_T	JAKMIP3	ENSG00000188385	ENST00000684848.1	rs2818387	synonymous_variant	1.37213569469503e-11
chr2_119706819_T_C	JAKMIP3	ENSG00000188385	ENST00000684848.1	rs2637647	intron_variant	5.59865628795196e-10
chr2_119707065_C_T	JAKMIP3	ENSG00000188385	ENST00000684848.1	rs2818385	intron_variant	1.37213569469503e-11
chr2_119708692_C_T	JAKMIP3	ENSG00000188385	ENST00000684848.1	rs2637624	intron_variant	8.62919979803746e-11
chr2_119712064_A_G	DPYSL4	ENSG00000151640	ENST00000338492.9	rs10781563	intron_variant	0.0323348320422467
chr2_119713138_T_C	DPYSL4	ENSG00000151640	ENST00000338492.9	rs871883	splice_polypyrimidine_tract_variant	4.21827607505008e-10
chr2_119716230_T_C	PWWP2B	ENSG00000171813	ENST00000305233.6	rs35169962	intron_variant	0.0238370107064596
chr2_119717110_A_G	MUC2	ENSG00000198788	ENST00000675028.1	rs10902081	intron_variant	0.0116766406553031
chr2_119721250_C_T	KRTAP5AS1	ENSG00000233930	ENST00000424148.1	rs28759035	intron_variant	5.24938043631988e-13
chr2_119870887_C_A	LSP1	ENSG00000130592	ENST00000311604.8	rs3817197	intron_variant	0.0061743613062532
chr2_119961803_T_C	LSP1	ENSG00000130592	ENST00000311604.8	rs10839934	intron_variant	0.0147741142650868
chr2_119984433_T_C	LSP1	ENSG00000130592	ENST00000311604.8	rs3781961	intron_variant	0.00205186849217426
chr2_120391389_A_C	LSP1	ENSG00000130592	ENST00000311604.8	rs11041676	intron_variant	1.49826024013249e-09
chr2_120743642_A_C	PRR33	ENSG00000283787	ENST00000640310.2	rs517101	5_prime_UTR_variant	0.0331064255722412
chr2_120755621_T_G	PRR33	ENSG00000283787	ENST00000640310.2	rs542605	5_prime_UTR_variant	3.48795479127381e-05
chr2_120757531_T_C	TNNT3	ENSG00000130595	ENST00000278317.11	rs1033122	intron_variant	4.19651165640311e-05
chr2_120759598_T_C	KCNQ1	ENSG00000053918	ENST00000155840.12	rs234878	intron_variant	0.000218812705921585
chr2_120771546_T_G	MMP26	ENSG00000167346	ENST00000380390.6	rs12419536	intron_variant	1.02444278090758e-05
chr2_126689277_C_T	FHIP1B	ENSG00000051009	ENST00000449352.7	rs11040807	intron_variant	0.0218016186181034
chr2_126689475_G_C	FHIP1B	ENSG00000051009	ENST00000449352.7	rs4758400	intron_variant	1.30452872450189e-05
chr2_126689521_G_T	FHIP1B	ENSG00000051009	ENST00000449352.7	rs1564131	intron_variant	0.00674907333829051
chr2_126690187_G_A	CCKBR	ENSG00000110148	ENST00000334619.7	rs2929181	intron_variant	1.30452872450189e-05
chr2_126691056_G_A	CCKBR	ENSG00000110148	ENST00000334619.7	rs2941026	intron_variant	1.30452872450189e-05
chr2_126691413_G_A	CCKBR	ENSG00000110148	ENST00000334619.7	rs2941029	intron_variant	5.92913452298627e-06
chr2_126691541_C_T	CCKBR	ENSG00000110148	ENST00000334619.7	rs10839533	intron_variant	5.92913452298627e-06
chr2_126691573_G_T	CCKBR	ENSG00000110148	ENST00000334619.7	rs4486604	intron_variant	5.92913452298627e-06
chr2_126691956_T_G	OR2AG1	ENSG00000279486	ENST00000641258.1	rs2741751	3_prime_UTR_variant	5.92913452298627e-06
chr2_126692090_C_T	OR2AG1	ENSG00000279486	ENST00000641258.1	rs2741750	3_prime_UTR_variant	5.92913452298627e-06
chr2_126692129_C_T	OR2AG1	ENSG00000279486	ENST00000641258.1	rs2741749	3_prime_UTR_variant	0.000315452187922722
chr2_126692543_G_A	OR2AG1	ENSG00000279486	ENST00000641258.1	rs2659883	3_prime_UTR_variant	5.92913452298627e-06
chr2_126692877_C_G	OR2AG1	ENSG00000279486	ENST00000641258.1	rs2741747	3_prime_UTR_variant	9.21944222557643e-06
chr2_126692979_G_A	OR2AG1	ENSG00000279486	ENST00000641258.1	rs2595498	3_prime_UTR_variant	5.92913452298627e-06
chr2_126694854_C_G	OR6A2	ENSG00000184933	ENST00000641196.1	rs2741746	3_prime_UTR_variant	2.92535664839882e-06
chr2_126695725_C_T	OR6A2	ENSG00000184933	ENST00000641196.1	rs2659884	3_prime_UTR_variant	0.000781462890253246
chr2_126696088_A_C	PPFIBP2	ENSG00000166387	ENST00000299492.9	rs4076808	intron_variant	1.30452872450189e-05
chr2_126696791_T_C	PPFIBP2	ENSG00000166387	ENST00000299492.9	rs10769804	intron_variant	0.000637693520137327
chr2_126696902_G_T	LMO1	ENSG00000166407	ENST00000335790.8	rs204937	intron_variant	1.30452872450189e-05
chr2_126697595_G_A	AMPD3	ENSG00000133805	ENST00000396553.7	rs10840429	intron_variant	0.0333021091564164
chr2_126698093_C_T	MICAL2	ENSG00000133816	ENST00000683283.1	rs10831768	intron_variant	0.00122386271281233
chr2_126698522_T_G	MICAL2	ENSG00000133816	ENST00000683283.1	rs7101833	intron_variant	9.21944222557643e-06
chr2_126700879_G_C	MICAL2	ENSG00000133816	ENST00000683283.1	rs3923360	intron_variant	0.00466413730431655
chr2_126703898_A_G	LINC00958	ENSG00000251381	ENST00000658243.1	rs7942018	intron_variant	2.8514495828446e-09
chr2_127232601_T_G	LINC00958	ENSG00000251381	ENST00000658243.1	rs10831931	intron_variant	7.02733372228513e-06
chr2_127835074_G_A	LINC00958	ENSG00000251381	ENST00000658243.1	rs7130063	intron_variant	0.0497583681187809
chr2_127842940_A_G	SPON1	ENSG00000262655	ENST00000576479.4	rs12291225	intron_variant	0.00146725318101382
chr2_127844028_T_C	SOX6	ENSG00000110693	ENST00000683767.1	rs2124202	intron_variant	0.0128233172264248
chr2_127844767_T_C	SOX6	ENSG00000110693	ENST00000683767.1	rs2351956	intron_variant	0.000641831503257983
chr2_127848488_A_G	SOX6	ENSG00000110693	ENST00000683767.1	rs10832569	intron_variant	0.0102191335747034
chr2_127849863_C_T	SOX6	ENSG00000110693	ENST00000396356.7	rs11023928	intron_variant	0.0102191335747034
chr2_127850716_T_C	KCNC1	ENSG00000129159	ENST00000265969.8	rs757511	intron_variant	0.0102191335747034
chr2_127852026_A_T	KCNC1	ENSG00000129159	ENST00000265969.8	rs10766431	intron_variant	0.0102191335747034
chr2_127855582_G_A	SAA2	ENSG00000134339	ENST00000256733.9	rs374511753	intron_variant	0.0175306799374678
chr2_127858427_A_G	HPS5	ENSG00000110756	ENST00000349215.8	rs11024618	intron_variant	0.0359508427176372
chr2_127942259_C_T	PTPN5	ENSG00000110786	ENST00000358540.7	rs1550871	intron_variant	6.35761676758808e-05
chr2_127944574_C_T	PTPN5	ENSG00000110786	ENST00000358540.7	rs1550870	synonymous_variant	0.00419805764622235
chr2_127951946_A_G	PTPN5	ENSG00000110786	ENST00000358540.7	rs4756961	intron_variant	0.00540915178739009
chr2_127968903_A_G	PTPN5	ENSG00000110786	ENST00000358540.7	rs7950091	intron_variant	0.0127461357526273
chr2_127969809_C_T	PTPN5	ENSG00000110786	ENST00000358540.7	rs751002	intron_variant	0.00419805764622235
chr2_127976631_G_A	NAV2	ENSG00000166833	ENST00000349880.9	rs67208360	intron_variant	0.000170061934841287
chr2_127980304_A_G	NAV2	ENSG00000166833	ENST00000349880.9	rs12797521	intron_variant	8.38940392900727e-05
chr2_127984771_T_C	NAV2	ENSG00000166833	ENST00000349880.9	rs1837971	synonymous_variant	8.38940392900727e-05
chr2_127988299_T_C	NAV2	ENSG00000166833	ENST00000349880.9	rs11025382	intron_variant	8.38940392900727e-05
chr2_128112424_A_G	HTATIP2	ENSG00000109854	ENST00000451739.7	rs10437608	5_prime_UTR_variant	2.40408076703512e-11
chr2_128140913_A_C	HTATIP2	ENSG00000109854	ENST00000451739.7	rs10833312	intron_variant	1.71058245820696e-07
chr2_128258394_A_G	HTATIP2	ENSG00000109854	ENST00000451739.7	rs10437583	intron_variant	0.00532642385925275
chr2_128300373_G_A	HTATIP2	ENSG00000109854	ENST00000451739.7	rs11025535	intron_variant	5.63434307663643e-17
chr2_130214427_G_A	HTATIP2	ENSG00000109854	ENST00000451739.7	rs10833313	intron_variant	3.0650751402687e-06
chr2_131573821_G_T	HTATIP2	ENSG00000109854	ENST00000451739.7	rs7925136	intron_variant	0.0277298571785354
chr2_131573917_C_T	HTATIP2	ENSG00000109854	ENST00000451739.7	rs7928503	intron_variant	0.0207244999001642
chr2_131574664_A_G	NELL1	ENSG00000165973	ENST00000357134.10	rs7129210	intron_variant	0.00880456553879419
chr2_131574873_C_T	GAS2	ENSG00000148935	ENST00000454584.7	rs1499243	intron_variant	0.00880456553879419
chr2_131575074_C_T	GAS2	ENSG00000148935	ENST00000454584.7	rs10833811	intron_variant	0.00880456553879419
chr2_131575543_T_C	GAS2	ENSG00000148935	ENST00000454584.7	rs1499244	intron_variant	0.0112601633737927
chr2_131575958_C_T	GAS2	ENSG00000148935	ENST00000454584.7	rs10833813	intron_variant	0.0406687679100123
chr2_131576368_T_G	GAS2	ENSG00000148935	ENST00000454584.7	rs12575051	intron_variant	0.0450563858244163
chr2_131765201_T_C	GAS2	ENSG00000148935	ENST00000454584.7	rs11026787	intron_variant	0.0210985997791882
chr2_132832002_T_C	GAS2	ENSG00000148935	ENST00000454584.7	rs7115745	intron_variant	0.0396095645428655
chr2_132869133_T_C	GAS2	ENSG00000148935	ENST00000454584.7	rs7941772	intron_variant	0.0461221941186885
chr2_133548047_G_C	GAS2	ENSG00000148935	ENST00000454584.7	rs2058372	intron_variant	0.00877778536790077
chr2_133619121_C_G	GAS2	ENSG00000148935	ENST00000454584.7	rs1990423	intron_variant	0.000367989613704518
chr2_133993729_A_G	GAS2	ENSG00000148935	ENST00000454584.7	rs7101469	intron_variant	1.29382343105665e-07
chr2_133995485_A_G	GAS2	ENSG00000148935	ENST00000454584.7	rs2058371	intron_variant	6.27795412482733e-07
chr2_133999056_A_G	GAS2	ENSG00000148935	ENST00000454584.7	rs7941671	intron_variant	1.35464415558005e-06
chr2_133999852_C_T	GAS2	ENSG00000148935	ENST00000454584.7	rs12270952	intron_variant	3.60123735920511e-06
chr2_134003611_G_A	GAS2	ENSG00000148935	ENST00000454584.7	rs12271316	intron_variant	7.33170643470106e-06
chr2_134004544_A_T	GAS2	ENSG00000148935	ENST00000454584.7	rs7105105	intron_variant	8.7399393506025e-09
chr2_134235728_G_T	LINC02699	ENSG00000254456	ENST00000526327.6	rs10767457	intron_variant	6.98555289034115e-07
chr2_136316562_G_A	LINC02699	ENSG00000254456	ENST00000526327.6	rs4923302	intron_variant	0.000582431094243307
chr2_136813448_C_G	LINC02699	ENSG00000254456	ENST00000526327.6	rs4923303	non_coding_transcript_exon_variant	0.0301236876383369
chr2_136818314_A_G	LINC02699	ENSG00000254456	ENST00000526327.6	rs4923304	non_coding_transcript_exon_variant	0.000279327626910957
chr2_136823777_A_G	LINC02699	ENSG00000254456	ENST00000526327.6	rs4923305	intron_variant	0.010126496294711
chr2_142208847_G_C	METTL15	ENSG00000169519	ENST00000634627.1	rs7111968	intron_variant	0.00120835040269109
chr2_142214630_G_A	LINC02755	ENSG00000254530	ENST00000657392.1	rs1234713	intron_variant	0.00191430766159392
chr2_142217941_C_T	LINC02755	ENSG00000254530	ENST00000657392.1	rs35900628	intron_variant	0.00584197617338491
chr2_142218578_T_C	MPPED2	ENSG00000066382	ENST00000448418.6	rs808155	intron_variant	0.000229937988407947
chr2_142220124_T_A	MPPED2	ENSG00000066382	ENST00000358117.10	rs543278	intron_variant	0.000229937988407947
chr2_142301997_G_A	TCP11L1	ENSG00000176148	ENST00000334274.9	rs12276109	intron_variant	6.42697965597155e-08
chr2_142312654_G_A	LMO2	ENSG00000135363	ENST00000257818.3	rs10836126	intron_variant	0.00598748847002081
chr2_142349664_C_T	LMO2	ENSG00000135363	ENST00000257818.3	rs7936114	intron_variant	9.30279101623051e-08
chr2_142458982_C_T	ABTB2	ENSG00000166016	ENST00000435224.3	rs2982593	intron_variant	4.02314454591001e-06
chr2_143919968_T_C	LDLRAD3	ENSG00000179241	ENST00000315571.6	rs7120328	intron_variant	0.000325976372753351
chr2_146408436_C_T	PRR5L	ENSG00000135362	ENST00000530639.6	rs10836535	intron_variant	2.58680810803245e-17
chr2_146824211_A_G	PRR5L	ENSG00000135362	ENST00000530639.6	rs4290197	intron_variant	2.24100817819361e-17
chr2_149051175_A_T	PRR5L	ENSG00000135362	ENST00000530639.6	rs7109880	intron_variant	0.024410337708399
chr2_156137166_C_T	LINC02760	ENSG00000254516	ENST00000532562.1	rs10836903	intron_variant	3.53597765020894e-07
chr2_156139370_C_G	LRRC4C	ENSG00000148948	ENST00000528697.6	rs10837377	intron_variant	2.65147933309431e-08
chr2_156152191_C_T	LRRC4C	ENSG00000148948	ENST00000528697.6	rs61886173	intron_variant	0.00964609974879409
chr2_156189945_T_C	LRRC4C	ENSG00000148948	ENST00000528697.6	rs113196482	intron_variant	0.0165602999458915
chr2_156294128_A_G	LRRC4C	ENSG00000148948	ENST00000528697.6	rs1462223	intron_variant	0.0263679999606633
chr2_156353955_A_T	LRRC4C	ENSG00000148948	ENST00000528697.6	rs1386405	intron_variant	0.0451882886157833
chr2_158130927_A_G	LINC02741	ENSG00000255388	ENST00000526978.5	rs10837666	intron_variant	0.00947174529741639
chr2_158132617_T_C	HNRNPKP3	ENSG00000251557	ENST00000533565.1	rs1353461	intron_variant	0.0138274005720783
chr2_158133293_T_C	HNRNPKP3	ENSG00000251557	ENST00000533565.1	rs1532408	intron_variant	0.00419805764622235
chr2_158141804_C_T	HNRNPKP3	ENSG00000251557	ENST00000533565.1	rs4755702	intron_variant	0.000101298264441256
chr2_158145360_T_C	HNRNPKP3	ENSG00000251557	ENST00000533565.1	rs10838081	intron_variant	1.36991646598522e-05
chr2_158147910_A_G	HNRNPKP3	ENSG00000251557	ENST00000533565.1	rs12577356	intron_variant	0.00630854747258804
chr2_158148073_C_G	HNRNPKP3	ENSG00000251557	ENST00000533565.1	rs11037386	intron_variant	0.00676979494780043
chr2_158148334_T_G	HNRNPKP3	ENSG00000251557	ENST00000533565.1	rs10838084	intron_variant	0.00275668591381823
chr2_158149748_A_G	ALX4	ENSG00000052850	ENST00000652299.1	rs11037922	intron_variant	0.000227669498977431
chr2_158150361_T_C	ALX4	ENSG00000052850	ENST00000652299.1	rs4755802	intron_variant	0.000227669498977431
chr2_158151551_A_T	ALX4	ENSG00000052850	ENST00000652299.1	rs12785603	intron_variant	1.49999429384359e-05
chr2_158152001_T_C	LINC02696	ENSG00000254427	ENST00000687184.1	rs11038413	intron_variant	1.49999429384359e-05
chr2_158155947_T_C	F2	ENSG00000180210	ENST00000311907.10	rs3136512	intron_variant	0.00161887315914954
chr2_158160546_C_T	F2	ENSG00000180210	ENST00000311907.10	rs3136516	intron_variant	0.000732689270201948
chr2_158161651_A_T	CKAP5	ENSG00000175216	ENST00000529230.6	rs11038993	intron_variant	3.87894872920682e-05
chr2_158162638_G_A	CKAP5	ENSG00000175216	ENST00000529230.6	rs4506602	intron_variant	1.04258058019351e-05
chr2_158174664_T_C	CKAP5	ENSG00000175216	ENST00000529230.6	rs7947747	intron_variant	0.0131763118959974
chr2_158202529_G_C	LRP4	ENSG00000134569	ENST00000378623.6	rs2306029	missense_variant	0.00155351178636181
chr2_158264209_T_C	PTPMT1	ENSG00000110536	ENST00000326674.10	rs118011483	intron_variant	0.000104407373797697
chr2_158421436_A_G	P2RX3	ENSG00000109991	ENST00000263314.3	rs10896609	intron_variant	0.00126350041846146
chr2_158421455_T_C	P2RX3	ENSG00000109991	ENST00000263314.3	rs10750859	intron_variant	0.00126350041846146
chr2_158421966_T_C	SLC43A3	ENSG00000134802	ENST00000395124.6	rs10750862	intron_variant	0.00126350041846146
chr2_158424954_T_G	OR5BA1P	ENSG00000255303	ENST00000641215.1	rs652191	intron_variant	0.000852375212550856
chr2_158433234_G_T	DTX4	ENSG00000110042	ENST00000227451.4	rs693960	intron_variant	0.000415289562059013
chr2_158438758_T_C	LINC00301	ENSG00000181995	ENST00000643933.1	rs10792288	intron_variant	0.00272237500509802
chr2_158441374_C_T	VPS37C	ENSG00000167987	ENST00000301765.10	rs11230608	intron_variant	0.00126350041846146
chr2_158449849_T_C	DAGLA	ENSG00000134780	ENST00000257215.10	rs11230781	intron_variant	3.04012913357617e-05
chr2_158450457_T_C	DAGLA	ENSG00000134780	ENST00000257215.10	rs4963307	intron_variant	1.50523218220637e-05
chr2_158452196_C_A	DAGLA	ENSG00000134780	ENST00000257215.10	rs198452	intron_variant	0.0462571340665024
chr2_158794171_C_T	DAGLA	ENSG00000134780	ENST00000257215.10	rs198437	intron_variant	0.025597589129409
chr2_158795719_G_T	MAJIN	ENSG00000168070	ENST00000301896.6	rs11231912	intron_variant	0.00348405869766689
chr2_159198937_T_A	ENPP7P7	ENSG00000273819	ENST00000611822.1	rs376711116	intron_variant	0.000641831503257983
chr2_161833795_A_T	ANO1	ENSG00000131620	ENST00000355303.10	rs2509142	intron_variant	0.00250144826766898
chr2_161842502_T_C	ANO1	ENSG00000131620	ENST00000355303.10	rs2509140	intron_variant	0.00502317570180469
chr2_161842529_A_G	ANO1	ENSG00000131620	ENST00000355303.10	rs34199493	intron_variant	0.00502317570180469
chr2_161873802_T_C	ACTE1P	ENSG00000172900	ENST00000460880.1	rs1792325	intron_variant	0.000405906433775642
chr2_161874676_G_A	NADSYN1	ENSG00000172890	ENST00000319023.7	rs4944996	intron_variant	0.000109798266681849
chr2_161876209_A_G	NADSYN1	ENSG00000172890	ENST00000527963.1	rs35708376	intron_variant	0.000109798266681849
chr2_161890713_C_T	PDE2A	ENSG00000186642	ENST00000334456.10	rs11235546	intron_variant	0.0167099582473852
chr2_163382964_G_A	ARAP1	ENSG00000186635	ENST00000393609.8	rs11235566	intron_variant	0.00038523171133641
chr2_165606323_C_T	ARAP1	ENSG00000186635	ENST00000393609.8	rs2306607	intron_variant	3.40516670348153e-05
chr2_165748500_A_T	ARAP1	ENSG00000186635	ENST00000393609.8	rs11235569	intron_variant	0.0164612546583581
chr2_165749290_A_G	ARAP1	ENSG00000186635	ENST00000393609.8	rs3816777	intron_variant	0.0164612546583581
chr2_165749417_A_C	ARAP1	ENSG00000186635	ENST00000393609.8	rs2306608	intron_variant	0.0164612546583581
chr2_165750483_G_T	ARAP1	ENSG00000186635	ENST00000393609.8	rs35250343	intron_variant	0.0200553720510873
chr2_165751236_T_C	ARAP1	ENSG00000186635	ENST00000393609.8	rs10898865	intron_variant	0.0164612546583581
chr2_165754317_C_T	ARAP1	ENSG00000186635	ENST00000393609.8	rs7112897	intron_variant	0.0292464979851996
chr2_165754576_C_T	ARAP1	ENSG00000186635	ENST00000393609.8	rs2306612	intron_variant	0.0292464979851996
chr2_165756733_G_T	ARAP1	ENSG00000186635	ENST00000393609.8	rs11602233	intron_variant	0.000506568347986439
chr2_165758067_T_C	ARAP1	ENSG00000186635	ENST00000393609.8	rs2291289	synonymous_variant	0.00118166522618995
chr2_165758269_G_A	ARAP1	ENSG00000186635	ENST00000393609.8	rs7105818	intron_variant	0.0271609882424148
chr2_165759045_C_T	ARAP1	ENSG00000186635	ENST00000393609.8	rs12801699	intron_variant	0.000730330399418701
chr2_165760157_A_G	ARAP1	ENSG00000186635	ENST00000393609.8	rs7110501	intron_variant	0.0200553720510873
chr2_165761147_A_G	ARAP1	ENSG00000186635	ENST00000393609.8	rs10898866	intron_variant	0.0463924584033338
chr2_165761752_C_T	ARAP1	ENSG00000186635	ENST00000393609.8	rs11605042	intron_variant	0.00196325361144363
chr2_165765599_C_T	ARAP1	ENSG00000186635	ENST00000393609.8	rs12274620	intron_variant	0.00180849938661642
chr2_165766088_C_G	ARAP1	ENSG00000186635	ENST00000393609.8	rs11235572	intron_variant	0.0379036429040099
chr2_165911666_A_T	ARAP1	ENSG00000186635	ENST00000393609.8	rs11235573	intron_variant	0.0130182706149374
chr2_165911668_A_T	ARAP1	ENSG00000186635	ENST00000393609.8	rs11235574	intron_variant	0.000828065294728357
chr2_166130837_C_T	ARAP1	ENSG00000186635	ENST00000393609.8	rs3765105	intron_variant	0.00324307087703259
chr2_166131588_G_C	ARAP1	ENSG00000186635	ENST00000393609.8	rs730783	intron_variant	0.00324307087703259
chr2_166132291_C_G	ARAP1	ENSG00000186635	ENST00000393609.8	rs900616	intron_variant	0.00324307087703259
chr2_166138486_A_G	ARAP1	ENSG00000186635	ENST00000393609.8	rs11235575	intron_variant	0.0001272341381212
chr2_166988658_G_T	ARAP1	ENSG00000186635	ENST00000393609.8	rs2365439	intron_variant	1.60823212228647e-05
chr2_167545135_T_C	ARAP1	ENSG00000186635	ENST00000393609.8	rs7110801	intron_variant	0.0403126712010148
chr2_167663423_G_A	FCHSD2	ENSG00000137478	ENST00000409418.9	rs7943424	intron_variant	0.0438860094078204
chr2_169554127_C_T	SPCS2	ENSG00000118363	ENST00000263672.11	rs562581	intron_variant	0.00630854747258804
chr2_169577092_C_G	ARRB1	ENSG00000137486	ENST00000420843.7	rs61895988	intron_variant	0.01214478190665
chr2_170390034_G_A	MYO7A	ENSG00000137474	ENST00000409709.9	rs10899354	intron_variant	1.22332335565821e-06
chr2_170396235_G_T	NDUFC2KCTD14	ENSG00000259112	ENST00000612612.5	rs11823760	intron_variant	0.00854031338045588
chr2_170397212_C_A	KCTD21	ENSG00000188997	ENST00000340067.4	rs4945255	intron_variant	0.0109241991007862
chr2_170400087_A_C	TENM4	ENSG00000149256	ENST00000278550.12	rs540342	intron_variant	0.000449100418354873
chr2_170401177_T_C	TENM4	ENSG00000149256	ENST00000278550.12	rs486694	intron_variant	0.000449100418354873
chr2_170402253_A_G	TENM4	ENSG00000149256	ENST00000278550.12	rs563759	intron_variant	5.62615292012554e-05
chr2_170404908_C_T	TENM4	ENSG00000149256	ENST00000278550.12	rs562231	intron_variant	0.000359654197527627
chr2_173472316_A_C	CCDC81	ENSG00000149201	ENST00000445632.7	rs4944572	intron_variant	0.00113725385875737
chr2_173472433_G_A	CCDC81	ENSG00000149201	ENST00000445632.7	rs3741007	intron_variant	0.00113725385875737
chr2_173472580_C_T	ME3	ENSG00000151376	ENST00000543262.5	rs4291698	intron_variant	0.0372415001905703
chr2_173472780_T_A	PRSS23	ENSG00000150687	ENST00000532572.1	rs1892891	intron_variant	0.00113725385875737
chr2_173472983_A_G	PRSS23	ENSG00000150687	ENST00000532572.1	rs1939099	intron_variant	0.00138128374255336
chr2_173473043_G_A	PRSS23	ENSG00000150687	ENST00000532572.1	rs2508430	intron_variant	0.00138128374255336
chr2_173473216_T_G	PRSS23	ENSG00000150687	ENST00000532572.1	rs2511883	intron_variant	0.00231256681678281
chr2_173473250_C_T	PRSS23	ENSG00000150687	ENST00000532572.1	rs2508429	intron_variant	0.00231256681678281
chr2_173473488_A_G	PRSS23	ENSG00000150687	ENST00000532572.1	rs2508428	intron_variant	0.0217367757648769
chr2_173473631_C_T	PRSS23	ENSG00000150687	ENST00000532572.1	rs2508427	intron_variant	0.00231256681678281
chr2_173473676_G_T	PRSS23	ENSG00000150687	ENST00000532572.1	rs7944581	intron_variant	0.00280016911891362
chr2_173474011_A_G	PRSS23	ENSG00000150687	ENST00000532572.1	rs2508426	intron_variant	0.003836720968151
chr2_173474198_C_T	PRSS23	ENSG00000150687	ENST00000532572.1	rs2508425	intron_variant	0.00231256681678281
chr2_173474419_A_G	PRSS23	ENSG00000150687	ENST00000532572.1	rs2511889	intron_variant	0.00231256681678281
chr2_173474920_T_C	TMEM135	ENSG00000166575	ENST00000305494.6	rs11494239	intron_variant	0.0250713994401087
chr2_173475610_A_G	TMEM135	ENSG00000166575	ENST00000305494.6	rs6592351	intron_variant	0.0250713994401087
chr2_173475757_C_T	GRM5	ENSG00000168959	ENST00000305447.5	rs160196	intron_variant	0.0427452578340207
chr2_173476287_T_C	GRM5	ENSG00000168959	ENST00000305447.5	rs178244	intron_variant	0.000590028745001508
chr2_173476430_C_T	GRM5	ENSG00000168959	ENST00000305447.5	rs308793	intron_variant	0.0423714640740707
chr2_173476463_C_T	NAALAD2	ENSG00000077616	ENST00000534061.6	rs12793414	intron_variant	0.0423714640740707
chr2_175057963_C_G	NAALAD2	ENSG00000077616	ENST00000534061.6	rs1943354	intron_variant	0.00147191996412085
chr2_176488095_C_T	DISC1FP1	ENSG00000261645	ENST00000649150.1	rs199997628	intron_variant	0.0194073209805358
chr2_176606729_C_T	SMCO4	ENSG00000166002	ENST00000298966.7	rs2605596	intron_variant	0.0160226524857022
chr2_176607035_T_C	SMCO4	ENSG00000166002	ENST00000298966.7	rs2605603	intron_variant	0.00380112299432764
chr2_176609678_C_G	SMCO4	ENSG00000166002	ENST00000298966.7	rs2605604	intron_variant	0.0173218890387142
chr2_176610099_T_C	PANX1	ENSG00000110218	ENST00000227638.8	rs11020660	intron_variant	0.0173218890387142
chr2_185160008_C_T	FAM76B	ENSG00000077458	ENST00000358780.10	rs11021311	intron_variant	0.00165517344528199
chr2_185310502_C_T	FAM76B	ENSG00000077458	ENST00000358780.10	rs1254989	intron_variant	0.028226685697309
chr2_185312382_A_G	FAM76B	ENSG00000077458	ENST00000358780.10	rs10831427	intron_variant	0.028226685697309
chr2_185312683_G_A	FAM76B	ENSG00000077458	ENST00000358780.10	rs10831428	intron_variant	0.028226685697309
chr2_185312733_T_G	FAM76B	ENSG00000077458	ENST00000358780.10	rs10831429	intron_variant	0.028226685697309
chr2_186072146_T_G	FAM76B	ENSG00000077458	ENST00000358780.10	rs10831432	intron_variant	0.00958763649180157
chr2_187801246_C_T	FAM76B	ENSG00000077458	ENST00000358780.10	rs3748252	intron_variant	0.0321446879337567
chr2_187808295_T_C	FAM76B	ENSG00000077458	ENST00000358780.10	rs3748253	intron_variant	0.0252956057779169
chr2_187819780_A_G	FAM76B	ENSG00000077458	ENST00000358780.10	rs10831433	intron_variant	0.0198765681443724
chr2_187831756_G_T	FAM76B	ENSG00000077458	ENST00000358780.10	rs10765771	intron_variant	0.00746668310562092
chr2_187831808_G_C	FAM76B	ENSG00000077458	ENST00000540054.5	rs11021318	intron_variant	0.00746668310562092
chr2_187836714_A_C	CEP57	ENSG00000166037	ENST00000325542.10	rs12272061	intron_variant	0.0348060840523112
chr2_187839305_T_G	CEP57	ENSG00000166037	ENST00000325542.10	rs12273579	intron_variant	0.0437578097664732
chr2_187861132_A_G	CEP57	ENSG00000166037	ENST00000325542.10	rs522536	intron_variant	0.000286777920994746
chr2_187867556_T_C	CEP57	ENSG00000166037	ENST00000325542.10	rs3017756	intron_variant	0.00037040569868783
chr2_187873725_C_T	CEP57	ENSG00000166037	ENST00000325542.10	rs519511	intron_variant	0.000667216792932932
chr2_192075332_T_C	CEP57	ENSG00000166037	ENST00000325542.10	rs666398	intron_variant	1.45889462994187e-19
chr2_195454576_G_A	CEP57	ENSG00000166037	ENST00000325542.10	rs603625	intron_variant	0.000380226287454741
chr2_195468328_C_A	CEP57	ENSG00000166037	ENST00000325542.10	rs564480	intron_variant	3.97301707451121e-05
chr2_195504798_A_C	CEP57	ENSG00000166037	ENST00000325542.10	rs7902	3_prime_UTR_variant	0.000680275225773698
chr2_197665569_G_A	MTMR2	ENSG00000087053	ENST00000346299.10	rs473852	intron_variant	0.0212881099746811
chr2_198881981_G_A	MTMR2	ENSG00000087053	ENST00000346299.10	rs568878	intron_variant	0.00739848327767236
chr2_199711372_G_A	MTMR2	ENSG00000087053	ENST00000346299.10	rs568120	intron_variant	5.10375218279365e-09
chr2_203429689_A_G	MTMR2	ENSG00000087053	ENST00000346299.10	rs662168	intron_variant	0.000812236863770083
chr2_203501730_A_G	MTMR2	ENSG00000087053	ENST00000346299.10	rs1271744	intron_variant	0.00529367971639877
chr2_203645005_T_G	MTMR2	ENSG00000087053	ENST00000346299.10	rs473157	intron_variant	5.44024291774408e-13
chr2_204241370_C_A	MTMR2	ENSG00000087053	ENST00000346299.10	rs687559	intron_variant	0.00143955476169637
chr2_205057541_A_G	MTMR2	ENSG00000087053	ENST00000346299.10	rs1254688	intron_variant	0.0468007483998626
chr2_205312144_T_C	MTMR2	ENSG00000087053	ENST00000346299.10	rs1150362	intron_variant	0.00467858376979499
chr2_205654114_A_G	MTMR2	ENSG00000087053	ENST00000346299.10	rs555556	intron_variant	1.64789735623589e-05
chr2_205655877_C_T	MTMR2	ENSG00000087053	ENST00000346299.10	rs693792	intron_variant	5.72257825578025e-05
chr2_205671605_A_G	MTMR2	ENSG00000087053	ENST00000346299.10	rs489649	intron_variant	0.000631535446356244
chr2_205672632_T_C	MTMR2	ENSG00000087053	ENST00000346299.10	rs525087	intron_variant	0.00201342203725459
chr2_205679012_T_A	MTMR2	ENSG00000087053	ENST00000346299.10	rs534973	intron_variant	0.000214511753138566
chr2_205679128_T_A	MTMR2	ENSG00000087053	ENST00000346299.10	rs542509	intron_variant	0.00217156347593477
chr2_208070303_A_G	MAML2	ENSG00000184384	ENST00000524717.6	rs7104987	3_prime_UTR_variant	0.00625069410271158
chr2_208198268_C_T	MAML2	ENSG00000184384	ENST00000524717.6	rs685252	intron_variant	0.000531863760269767
chr2_209003747_T_A	MAML2	ENSG00000184384	ENST00000524717.6	rs590274	intron_variant	5.47241341921333e-08
chr2_209003802_C_T	MAML2	ENSG00000184384	ENST00000524717.6	rs509665	intron_variant	0.00218527684290731
chr2_209003977_C_T	MAML2	ENSG00000184384	ENST00000524717.6	rs2509092	intron_variant	0.0175832598439978
chr2_209004104_T_C	MAML2	ENSG00000184384	ENST00000524717.6	rs2509080	intron_variant	0.0119626003111216
chr2_209004357_G_C	MAML2	ENSG00000184384	ENST00000524717.6	rs480834	intron_variant	0.00921596502405612
chr2_209004624_A_T	MAML2	ENSG00000184384	ENST00000524717.6	rs607816	intron_variant	0.0186677330831106
chr2_209017256_A_G	LINC02713	ENSG00000255502	ENST00000667368.1	rs2851677	intron_variant	0.0354260226164901
chr2_209019181_T_C	CNTN5	ENSG00000149972	ENST00000524871.6	rs2186836	intron_variant	0.0418780205882889
chr2_209019508_T_A	CNTN5	ENSG00000149972	ENST00000524871.6	rs6589889	intron_variant	0.027484648655817
chr2_209019891_C_T	CNTN5	ENSG00000149972	ENST00000524871.6	rs1940522	intron_variant	0.027484648655817
chr2_209021372_A_G	CNTN5	ENSG00000149972	ENST00000524871.6	rs7122282	intron_variant	0.00494621746979659
chr2_209023260_A_G	CNTN5	ENSG00000149972	ENST00000524871.6	rs11218420	intron_variant	0.00494621746979659
chr2_209025215_T_G	CNTN5	ENSG00000149972	ENST00000524871.6	rs10893856	intron_variant	0.00767498470749732
chr2_209027056_G_T	PGR	ENSG00000082175	ENST00000325455.10	rs635984	intron_variant	0.00378932884748688
chr2_209029330_C_T	PGR	ENSG00000082175	ENST00000325455.10	rs660541	intron_variant	0.00378932884748688
chr2_210833465_C_T	MMP7	ENSG00000137673	ENST00000260227.5	rs12285347	intron_variant	0.00859253703182709
chr2_210841275_T_A	PDGFD	ENSG00000170962	ENST00000393158.7	rs7940550	intron_variant	0.00362791640285272
chr2_211010267_T_C	PDGFD	ENSG00000170962	ENST00000393158.7	rs10791669	intron_variant	9.34441455418967e-05
chr2_211017485_A_T	PDGFD	ENSG00000170962	ENST00000393158.7	rs7937813	intron_variant	4.72926285329094e-05
chr2_211021874_G_T	PDGFD	ENSG00000170962	ENST00000393158.7	rs10791670	intron_variant	0.0263679999606633
chr2_211032455_C_T	PDGFD	ENSG00000170962	ENST00000393158.7	rs10791671	intron_variant	0.0348060840523112
chr2_213066548_C_G	PDGFD	ENSG00000170962	ENST00000393158.7	rs10750686	intron_variant	7.81538369961812e-05
chr2_213069054_T_G	PDGFD	ENSG00000170962	ENST00000393158.7	rs10791672	intron_variant	2.2168385471649e-07
chr2_213072497_T_C	PDGFD	ENSG00000170962	ENST00000393158.7	rs10791673	intron_variant	2.10803614983042e-06
chr2_213073043_G_C	PDGFD	ENSG00000170962	ENST00000393158.7	rs9633982	intron_variant	1.03528794153319e-05
chr2_213073116_C_T	PDGFD	ENSG00000170962	ENST00000393158.7	rs10791674	intron_variant	1.03528794153319e-05
chr2_213073829_G_T	PDGFD	ENSG00000170962	ENST00000393158.7	rs2408843	intron_variant	5.27379365062508e-06
chr2_213075585_A_C	PDGFD	ENSG00000170962	ENST00000393158.7	rs2408844	intron_variant	3.71903284903244e-06
chr2_213076857_G_A	PDGFD	ENSG00000170962	ENST00000393158.7	rs2898026	intron_variant	1.29997720279536e-05
chr2_213076919_T_G	PDGFD	ENSG00000170962	ENST00000393158.7	rs7107580	intron_variant	3.39349827857742e-05
chr2_213084294_T_C	PDGFD	ENSG00000170962	ENST00000393158.7	rs7111963	intron_variant	1.58373603085815e-06
chr2_213088103_C_T	PDGFD	ENSG00000170962	ENST00000393158.7	rs10791675	intron_variant	4.77395629987165e-06
chr2_213088697_G_A	PDGFD	ENSG00000170962	ENST00000393158.7	rs1483500	intron_variant	9.21944222557643e-06
chr2_213103591_T_A	DDX10	ENSG00000178105	ENST00000322536.8	rs9735328	intron_variant	6.71190714126554e-05
chr2_213104051_G_A	ZC3H12C	ENSG00000149289	ENST00000278590.8	rs112709212	intron_variant	2.79577794735941e-07
chr2_213113717_T_C	LINC02763	ENSG00000254968	ENST00000665326.1	rs1534125	intron_variant	4.29002123076825e-06
chr2_213113802_T_C	LINC02763	ENSG00000254968	ENST00000665326.1	rs1540072	intron_variant	4.29002123076825e-06
chr2_213114171_T_A	LINC02763	ENSG00000254968	ENST00000665326.1	rs1404797	intron_variant	9.40948202893797e-08
chr2_213116391_T_C	LINC02763	ENSG00000254968	ENST00000665326.1	rs34692345	intron_variant	8.18131190873218e-07
chr2_213116704_A_C	LINC02763	ENSG00000254968	ENST00000665326.1	rs11214196	intron_variant	2.36359897016709e-05
chr2_213116739_A_G	LINC02763	ENSG00000254968	ENST00000665326.1	rs11512550	intron_variant	8.18131190873218e-07
chr2_213717156_A_T	LINC02763	ENSG00000254968	ENST00000665326.1	rs11214201	intron_variant	0.0234156490334296
chr2_213728923_A_G	LINC02763	ENSG00000254968	ENST00000665326.1	rs12365584	intron_variant	0.00347322646759383
chr2_214424561_T_C	LINC02763	ENSG00000254968	ENST00000665326.1	rs1589869	intron_variant	0.034500090450715
chr2_214480719_G_A	LINC02763	ENSG00000254968	ENST00000665326.1	rs1525416	intron_variant	0.0405497299648312
chr2_214483833_G_A	LINC02763	ENSG00000254968	ENST00000665326.1	rs7951948	intron_variant	0.0113973528526393
chr2_214484965_A_G	LINC02763	ENSG00000254968	ENST00000665326.1	rs10891371	intron_variant	0.00679057865234555
chr2_214493078_G_C	LINC02763	ENSG00000254968	ENST00000665326.1	rs12418084	intron_variant	0.0054258472670554
chr2_214494731_C_T	LINC02763	ENSG00000254968	ENST00000665326.1	rs11214207	intron_variant	0.0340961723959164
chr2_214498582_G_T	NCAM1	ENSG00000149294	ENST00000316851.12	rs1836796	intron_variant	0.00781699185334172
chr2_215029049_T_C	CADM1	ENSG00000182985	ENST00000331581.11	rs4938180	3_prime_UTR_variant	0.00152422205262015
chr2_215915665_C_A	CADM1	ENSG00000182985	ENST00000331581.11	rs11606837	3_prime_UTR_variant	0.0189488795493065
chr2_215916072_T_C	CADM1	ENSG00000182985	ENST00000331581.11	rs10891802	3_prime_UTR_variant	0.00147191996412085
chr2_215919106_G_T	CADM1	ENSG00000182985	ENST00000331581.11	rs11215397	3_prime_UTR_variant	0.000621401056170979
chr2_215919633_C_A	CADM1	ENSG00000182985	ENST00000331581.11	rs17304149	intron_variant	0.00090021326270854
chr2_215920965_A_G	CADM1	ENSG00000182985	ENST00000331581.11	rs34138164	intron_variant	0.000456476184504443
chr2_215922379_T_C	CADM1	ENSG00000182985	ENST00000331581.11	rs11605461	intron_variant	0.0301236876383369
chr2_215922517_C_A	CADM1	ENSG00000182985	ENST00000331581.11	rs12807135	intron_variant	0.0301236876383369
chr2_215922557_C_T	CADM1	ENSG00000182985	ENST00000331581.11	rs7101437	intron_variant	0.0301236876383369
chr2_215923420_G_A	CADM1	ENSG00000182985	ENST00000331581.11	rs7125930	intron_variant	0.0174782533380543
chr2_218052281_T_C	APOA1AS	ENSG00000235910	ENST00000669664.1	rs2727784	intron_variant	0.000229179376528066
chr2_218062142_G_A	FXYD2	ENSG00000137731	ENST00000532119.5	rs610226	intron_variant	0.00119303041177906
chr2_218191657_G_A	TMPRSS13	ENSG00000137747	ENST00000524993.6	rs11601073	intron_variant	3.65313138510255e-06
chr2_218193087_A_C	TMPRSS13	ENSG00000137747	ENST00000524993.6	rs12798929	intron_variant	0.00803482240786495
chr2_218193261_T_C	TMPRSS13	ENSG00000137747	ENST00000524993.6	rs11216613	intron_variant	0.00803482240786495
chr2_218194020_C_T	TMPRSS13	ENSG00000137747	ENST00000524993.6	rs947969	intron_variant	0.00803482240786495
chr2_218199668_T_A	CXCR5	ENSG00000160683	ENST00000292174.5	rs581063	3_prime_UTR_variant	0.000454991608575541
chr2_218201795_T_C	BCL9L	ENSG00000186174	ENST00000683865.1	rs11217081	3_prime_UTR_variant	0.00502317570180469
chr2_218202257_C_T	BCL9L	ENSG00000186174	ENST00000683865.1	rs11217083	intron_variant	0.0394935471610914
chr2_218203057_C_T	HMBS	ENSG00000256269	ENST00000652429.1	rs1488048539	intron_variant	0.00758171531400849
chr2_218205828_C_T	SORL1	ENSG00000137642	ENST00000260197.12	rs617847	intron_variant	0.00875108468575156
chr2_218207952_G_A	SORL1	ENSG00000137642	ENST00000260197.12	rs626885	intron_variant	0.00875108468575156
chr2_218208295_C_T	SORL1	ENSG00000137642	ENST00000260197.12	rs3933404	intron_variant	0.000215936122566278
chr2_218209081_A_G	SORL1	ENSG00000137642	ENST00000260197.12	rs3781827	intron_variant	0.0156894156813621
chr2_218211490_G_C	SORL1	ENSG00000137642	ENST00000260197.12	rs688503	intron_variant	0.00216473836668016
chr2_218212019_C_G	SORL1	ENSG00000137642	ENST00000260197.12	rs10892754	intron_variant	0.00875108468575156
chr2_218214790_G_A	SORL1	ENSG00000137642	ENST00000260197.12	rs682021	intron_variant	0.0411483321399651
chr2_218215995_G_A	SORL1	ENSG00000137642	ENST00000260197.12	rs7933552	intron_variant	0.00378932884748688
chr2_218216255_G_A	SORL1	ENSG00000137642	ENST00000260197.12	rs10790446	intron_variant	0.00378932884748688
chr2_218217396_G_T	SORL1	ENSG00000137642	ENST00000260197.12	rs114739102	intron_variant	0.000227669498977431
chr2_218217607_A_G	SORL1	ENSG00000137642	ENST00000260197.12	rs114324570	intron_variant	0.00443883208866759
chr2_218218595_G_T	SORL1	ENSG00000137642	ENST00000260197.12	rs9633951	intron_variant	0.0415116149953459
chr2_218221140_G_C	MIR100HG	ENSG00000255248	ENST00000533109.6	rs1450795	intron_variant	0.0415116149953459
chr2_218222349_A_T	MIR100HG	ENSG00000255248	ENST00000533109.6	rs7115307	intron_variant	0.0415116149953459
chr2_218224408_A_T	MIR100HG	ENSG00000255248	ENST00000533109.6	rs1839546	intron_variant	0.0415116149953459
chr2_218228276_G_A	MIR100HG	ENSG00000255248	ENST00000533109.6	rs896128	intron_variant	0.0415116149953459
chr2_218230831_G_A	MIR100HG	ENSG00000255248	ENST00000533109.6	rs2084636	intron_variant	0.0415116149953459
chr2_218233015_G_A	MIR100HG	ENSG00000255248	ENST00000533109.6	rs3855349	intron_variant	0.0415116149953459
chr2_218233050_A_G	MIR100HG	ENSG00000255248	ENST00000533109.6	rs6589925	intron_variant	0.000786511469454984
chr2_218234030_A_G	MIR100HG	ENSG00000255248	ENST00000533109.6	rs1823511	intron_variant	0.000586217875232471
chr2_218237609_C_T	MSANTD2AS1	ENSG00000245498	ENST00000499143.6	rs11219787	intron_variant	0.00223394336226068
chr2_218238857_A_G	FEZ1	ENSG00000149557	ENST00000648911.1	rs4935922	intron_variant	0.00192643114421711
chr2_218240104_G_A	FAM118B	ENSG00000197798	ENST00000533050.6	rs512577	intron_variant	2.42146955972478e-05
chr2_218244190_C_A	FAM118B	ENSG00000197798	ENST00000533050.6	rs1613078	intron_variant	0.0415116149953459
chr2_218244310_A_G	DCPS	ENSG00000110063	ENST00000263579.5	rs652534	intron_variant	0.0415116149953459
chr2_218244641_G_C	DCPS	ENSG00000110063	ENST00000263579.5	rs684687	intron_variant	0.00223394336226068
chr2_218245832_A_G	DCPS	ENSG00000110063	ENST00000263579.5	rs683800	intron_variant	0.00223394336226068
chr2_218245902_G_A	DCPS	ENSG00000110063	ENST00000263579.5	rs672806	intron_variant	0.0415116149953459
chr2_218245998_G_A	DCPS	ENSG00000110063	ENST00000263579.5	rs1614592	intron_variant	0.00174115937340526
chr2_218248233_T_C	DCPS	ENSG00000110063	ENST00000263579.5	rs1613784	intron_variant	0.00223394336226068
chr2_218248366_G_T	KIRREL3	ENSG00000149571	ENST00000525144.7	rs73031007	intron_variant	0.00136816769977192
chr2_218252759_G_A	KIRREL3	ENSG00000149571	ENST00000525144.7	rs618603	intron_variant	0.00223394336226068
chr2_218297706_A_C	KIRREL3	ENSG00000149571	ENST00000525144.7	rs948118	intron_variant	1.31577165334628e-06
chr2_218395121_A_G	KIRREL3	ENSG00000149571	ENST00000525144.7	rs1940002	intron_variant	0.0309350371210389
chr2_218446792_C_T	NTM	ENSG00000182667	ENST00000683400.1	rs4426141	intron_variant	0.0144662303424193
chr2_219367159_T_C	OPCML	ENSG00000183715	ENST00000524381.6	rs6590689	intron_variant	0.0390327783079516
chr2_220174233_C_T	OPCML	ENSG00000183715	ENST00000524381.6	rs10894672	intron_variant	0.0138274005720783
chr2_220196164_T_A	IQSEC3	ENSG00000120645	ENST00000538872.6	rs113879277	3_prime_UTR_variant	0.00805938839246404
chr2_220199611_A_T	SLC6A13	ENSG00000010379	ENST00000343164.9	rs2080402	intron_variant	0.0149529071941281
chr2_220202970_T_C	SLC6A13	ENSG00000010379	ENST00000343164.9	rs3782860	intron_variant	0.0432486482296705
chr2_220237061_C_T	NINJ2	ENSG00000171840	ENST00000305108.10	rs202216833	intron_variant	0.0289882294692584
chr2_220238308_G_T	ERC1	ENSG00000082805	ENST00000360905.9	rs2369848	intron_variant	0.0289882294692584
chr2_220298860_A_G	CACNA2D4	ENSG00000151062	ENST00000382722.10	rs7964245	intron_variant	0.0181175873591142
chr2_220310206_T_C	LRTM2	ENSG00000166159	ENST00000299194.6	rs4765845	5_prime_UTR_variant	0.018280949692323
chr2_220312965_C_T	TSPAN9	ENSG00000011105	ENST00000011898.10	rs36077100	intron_variant	0.0172184047653525
chr2_220313858_T_C	TSPAN9	ENSG00000011105	ENST00000011898.10	rs10744599	intron_variant	0.0172184047653525
chr2_220314704_T_G	CRACR2A	ENSG00000130038	ENST00000440314.7	rs11062789	intron_variant	0.0188359290827425
chr2_220337131_A_G	ANO2	ENSG00000047617	ENST00000682330.1	rs55772073	intron_variant	3.98663675863625e-05
chr2_220337180_G_A	ANO2	ENSG00000047617	ENST00000682330.1	rs112291187	intron_variant	3.98663675863625e-05
chr2_220337301_T_C	ANO2	ENSG00000047617	ENST00000682330.1	rs12581516	intron_variant	3.98663675863625e-05
chr2_220337952_C_T	CD9	ENSG00000010278	ENST00000009180.10	rs4764486	intron_variant	3.98663675863625e-05
chr2_220338716_C_T	TNFRSF1A	ENSG00000067182	ENST00000162749.7	rs4149581	intron_variant	0.00918796449934114
chr2_220339552_G_T	TNFRSF1A	ENSG00000067182	ENST00000162749.7	rs4149580	intron_variant	3.17910485867829e-05
chr2_220341423_G_A	TNFRSF1A	ENSG00000067182	ENST00000162749.7	rs4149576	intron_variant	0.00918796449934114
chr2_220341988_A_G	TNFRSF1A	ENSG00000067182	ENST00000162749.7	rs767455	synonymous_variant	0.00918796449934114
chr2_220345841_A_G	LPAR5	ENSG00000184574	ENST00000329858.9	rs7137095	intron_variant	0.0154091708732144
chr2_220345880_C_T	P3H3	ENSG00000110811	ENST00000290510.10	rs10744717	intron_variant	0.0154091708732144
chr2_220347228_G_A	P3H3	ENSG00000110811	ENST00000290510.10	rs4963513	intron_variant	1.516528843058e-09
chr2_221300740_T_C	P3H3	ENSG00000110811	ENST00000290510.10	rs4963512	intron_variant	0.00455012310519834
chr2_221315098_C_T	P3H3	ENSG00000110811	ENST00000290510.10	rs6489736	intron_variant	0.0146413894019716
chr2_221318281_T_C	P3H3	ENSG00000110811	ENST00000290510.10	rs4963518	intron_variant	0.0146413894019716
chr2_221318774_C_A	P3H3	ENSG00000110811	ENST00000290510.10	rs4963510	intron_variant	0.0146413894019716
chr2_221320525_G_C	P3H3	ENSG00000110811	ENST00000290510.10	rs4963517	intron_variant	0.0146413894019716
chr2_221325734_A_T	LPCAT3	ENSG00000111684	ENST00000261407.9	rs7487926	intron_variant	0.000352656894026649
chr2_221327635_A_G	LINC00937	ENSG00000226091	ENST00000544461.1	rs10431242	intron_variant	0.0146413894019716
chr2_222464406_T_C	CLEC1B	ENSG00000165682	ENST00000298527.11	rs7980698	intron_variant	0.00192036005186578
chr2_222823338_G_T	BORCS5	ENSG00000165714	ENST00000314565.9	rs11054851	intron_variant	0.00460678578462053
chr2_222823438_T_A	BORCS5	ENSG00000165714	ENST00000314565.9	rs7967230	intron_variant	0.00460678578462053
chr2_222823631_G_A	BORCS5	ENSG00000165714	ENST00000314565.9	rs7310012	intron_variant	0.00460678578462053
chr2_222824351_A_T	BORCS5	ENSG00000165714	ENST00000314565.9	rs888200	intron_variant	0.00460678578462053
chr2_222826081_A_C	BORCS5	ENSG00000165714	ENST00000314565.9	rs7295080	intron_variant	0.00460678578462053
chr2_222826781_T_A	BORCS5	ENSG00000165714	ENST00000314565.9	rs2417187	intron_variant	5.21787239115609e-06
chr2_222828512_T_C	BORCS5	ENSG00000165714	ENST00000314565.9	rs4319596	intron_variant	0.00460678578462053
chr2_222830639_G_C	BORCS5	ENSG00000165714	ENST00000314565.9	rs61923613	intron_variant	0.0304816949710556
chr2_222830779_T_C	BORCS5	ENSG00000165714	ENST00000314565.9	rs10459098	intron_variant	0.0304816949710556
chr2_222831532_T_C	BORCS5	ENSG00000165714	ENST00000314565.9	rs11054894	intron_variant	0.0497583681187809
chr2_222831958_C_T	BORCS5	ENSG00000165714	ENST00000314565.9	rs10845533	intron_variant	0.0418780205882889
chr2_222832061_T_A	BORCS5	ENSG00000165714	ENST00000314565.9	rs11837772	intron_variant	0.0334989193100284
chr2_222832066_C_A	BORCS5	ENSG00000165714	ENST00000314565.9	rs7969020	intron_variant	0.0334989193100284
chr2_222832872_C_G	BORCS5	ENSG00000165714	ENST00000314565.9	rs7969270	intron_variant	0.0334989193100284
chr2_222833156_G_T	BORCS5	ENSG00000165714	ENST00000314565.9	rs7969252	intron_variant	0.0334989193100284
chr2_222833724_T_C	BORCS5	ENSG00000165714	ENST00000314565.9	rs7954752	intron_variant	0.0304816949710556
chr2_222834502_A_G	BORCS5	ENSG00000165714	ENST00000314565.9	rs11532310	intron_variant	0.0304816949710556
chr2_222835487_G_A	BORCS5	ENSG00000165714	ENST00000314565.9	rs10845537	intron_variant	0.0304816949710556
chr2_222835851_T_G	BORCS5	ENSG00000165714	ENST00000314565.9	rs4763825	intron_variant	0.030212803499978
chr2_222837671_C_T	BORCS5	ENSG00000165714	ENST00000314565.9	rs7969849	intron_variant	0.0304816949710556
chr2_222839358_A_G	BORCS5	ENSG00000165714	ENST00000314565.9	rs7969984	intron_variant	0.0304816949710556
chr2_223388930_A_C	BORCS5	ENSG00000165714	ENST00000314565.9	rs10845539	intron_variant	0.0185010016088202
chr2_227667842_G_A	BORCS5	ENSG00000165714	ENST00000314565.9	rs10845540	intron_variant	0.0330090042830842
chr2_230963036_T_C	BORCS5	ENSG00000165714	ENST00000314565.9	rs4390432	intron_variant	0.00244709289161541
chr2_231617457_A_G	BORCS5	ENSG00000165714	ENST00000314565.9	rs4547192	intron_variant	0.000641831503257983
chr2_231617909_T_C	BORCS5	ENSG00000165714	ENST00000314565.9	rs4488294	intron_variant	0.000789047710340967
chr2_231618970_C_T	BORCS5	ENSG00000165714	ENST00000314565.9	rs10772563	intron_variant	3.66880385286145e-08
chr2_231863065_G_C	BORCS5	ENSG00000165714	ENST00000314565.9	rs10743985	intron_variant	0.000796704533264205
chr2_231863727_T_C	BORCS5	ENSG00000165714	ENST00000314565.9	rs4763826	intron_variant	0.0247754680188966
chr2_231865095_T_C	BORCS5	ENSG00000165714	ENST00000314565.9	rs11054904	intron_variant	0.0361628845415977
chr2_231869292_A_T	BORCS5	ENSG00000165714	ENST00000314565.9	rs6488525	intron_variant	0.0226619268773766
chr2_231873048_C_T	BORCS5	ENSG00000165714	ENST00000314565.9	rs6488526	intron_variant	0.0187797002542189
chr2_231873231_C_T	BORCS5	ENSG00000165714	ENST00000314565.9	rs10845541	intron_variant	0.0187797002542189
chr2_231873522_A_G	BORCS5	ENSG00000165714	ENST00000314565.9	rs3925170	intron_variant	0.0187797002542189
chr2_231875398_C_T	BORCS5	ENSG00000165714	ENST00000314565.9	rs1019340	intron_variant	0.0262121318635913
chr2_231876795_A_T	BORCS5	ENSG00000165714	ENST00000314565.9	rs7315626	intron_variant	0.000601607388615279
chr2_232369662_G_A	BORCS5	ENSG00000165714	ENST00000314565.9	rs4763829	intron_variant	0.000617392009751657
chr2_232369778_G_A	BORCS5	ENSG00000165714	ENST00000314565.9	rs2216264	intron_variant	0.000234541574288202
chr2_232394382_C_T	BORCS5	ENSG00000165714	ENST00000314565.9	rs7311364	intron_variant	0.0370233000086468
chr2_232402060_G_A	BORCS5	ENSG00000165714	ENST00000314565.9	rs1468876	intron_variant	0.0167099582473852
chr2_232440073_T_C	BORCS5	ENSG00000165714	ENST00000314565.9	rs1019341	intron_variant	0.00280016911891362
chr2_232440571_T_C	BORCS5	ENSG00000165714	ENST00000314565.9	rs10845546	intron_variant	0.0493249727784649
chr2_232598058_C_T	BORCS5	ENSG00000165714	ENST00000314565.9	rs879445	intron_variant	0.0376816646343761
chr2_233121427_T_C	BORCS5	ENSG00000165714	ENST00000314565.9	rs7967038	intron_variant	0.00107368148573048
chr2_233127516_G_A	BORCS5	ENSG00000165714	ENST00000314565.9	rs11054914	intron_variant	0.0125931296932094
chr2_234098019_T_A	BORCS5	ENSG00000165714	ENST00000314565.9	rs7309503	intron_variant	0.00330431952615689
chr2_234098364_T_C	BORCS5	ENSG00000165714	ENST00000314565.9	rs7961703	intron_variant	0.00382481894825538
chr2_234098370_C_T	BORCS5	ENSG00000165714	ENST00000314565.9	rs10734852	intron_variant	0.00130024576762799
chr2_236664788_G_A	BORCS5	ENSG00000165714	ENST00000314565.9	rs1030069	intron_variant	0.000171766648460231
chr2_236769285_A_T	BORCS5	ENSG00000165714	ENST00000314565.9	rs11609375	intron_variant	0.000307273023151788
chr2_236769409_T_C	BORCS5	ENSG00000165714	ENST00000314565.9	rs4763830	intron_variant	0.034398676121119
chr2_237409179_A_C	BORCS5	ENSG00000165714	ENST00000314565.9	rs7313825	intron_variant	0.00218527684290731
chr2_237410343_G_A	BORCS5	ENSG00000165714	ENST00000314565.9	rs7132512	intron_variant	0.0487528255809401
chr2_237411728_T_G	BORCS5	ENSG00000165714	ENST00000314565.9	rs3751261	intron_variant	0.00114089158416929
chr2_237918198_C_A	BORCS5	ENSG00000165714	ENST00000314565.9	rs9412	3_prime_UTR_variant	2.61254719398895e-05
chr2_238164874_A_C	BORCS5	ENSG00000165714	ENST00000314565.9	rs4763832	3_prime_UTR_variant	0.00551008223747072
chr2_238515201_A_G	APOLD1	ENSG00000178878	ENST00000326765.10	rs10772599	intron_variant	0.00600592444416056
chr2_238527570_A_G	GPRC5A	ENSG00000013588	ENST00000014914.6	rs3782572	intron_variant	0.00854031338045588
chr2_238536181_A_C	GPRC5A	ENSG00000013588	ENST00000014914.6	rs7311128	intron_variant	0.0246287816182211
chr2_238541453_G_A	GPRC5A	ENSG00000013588	ENST00000014914.6	rs7311242	intron_variant	0.00278269600802146
chr2_238542899_G_A	GPRC5A	ENSG00000013588	ENST00000014914.6	rs850937	intron_variant	0.000617392009751657
chr2_238556312_T_G	GPRC5A	ENSG00000013588	ENST00000014914.6	rs1056927	3_prime_UTR_variant	1.7288124756347e-08
chr2_238913515_T_C	SLC15A5	ENSG00000188991	ENST00000344941.3	rs3852572	3_prime_UTR_variant	0.00695910557235194
chr2_239494859_G_A	SLC15A5	ENSG00000188991	ENST00000344941.3	rs1913256	intron_variant	3.89330523558553e-12
chr2_239495978_T_G	SLC15A5	ENSG00000188991	ENST00000344941.3	rs10219733	intron_variant	1.87043409641545e-09
chr2_239497984_A_C	SLC15A5	ENSG00000188991	ENST00000344941.3	rs10219493	intron_variant	0.0389184066929509
chr2_239690723_G_T	SLC15A5	ENSG00000188991	ENST00000344941.3	rs4381413	intron_variant	0.0116413679556292
chr2_239928051_G_C	SLC15A5	ENSG00000188991	ENST00000344941.3	rs4290282	intron_variant	0.0143794188135866
chr2_240114652_C_T	SLC15A5	ENSG00000188991	ENST00000344941.3	rs3847918	intron_variant	0.0209731742868139
chr2_240115268_T_C	SLC15A5	ENSG00000188991	ENST00000344941.3	rs7297251	intron_variant	0.0209731742868139
chr2_240453074_A_G	SLC15A5	ENSG00000188991	ENST00000344941.3	rs2417543	intron_variant	0.000495170488140083
chr2_240685247_C_A	SLC15A5	ENSG00000188991	ENST00000344941.3	rs3942536	synonymous_variant	0.0207863977020303
chr2_242158130_T_A	SLC15A5	ENSG00000188991	ENST00000344941.3	rs1405516	intron_variant	0.00755857136066677
chr3_156477_T_C	SLC15A5	ENSG00000188991	ENST00000344941.3	rs1527003	intron_variant	0.000518222843408902
chr3_179038_C_T	SLC15A5	ENSG00000188991	ENST00000344941.3	rs7967243	intron_variant	0.0101881629904538
chr3_183268_T_A	SLC15A5	ENSG00000188991	ENST00000344941.3	rs1527004	intron_variant	0.00147660125814631
chr3_186960_C_T	SLC15A5	ENSG00000188991	ENST00000344941.3	rs3915245	intron_variant	0.0114665576682685
chr3_193922_A_T	SLC15A5	ENSG00000188991	ENST00000344941.3	rs1852449	intron_variant	0.00626992077693732
chr3_194092_A_G	SLC15A5	ENSG00000188991	ENST00000344941.3	rs3843665	intron_variant	0.0346017960068457
chr3_903537_G_A	SLC15A5	ENSG00000188991	ENST00000344941.3	rs3852573	intron_variant	0.0171155233537887
chr3_1179147_G_A	SLC15A5	ENSG00000188991	ENST00000344941.3	rs3864920	intron_variant	0.00236400108575016
chr3_1179519_T_G	SLC15A5	ENSG00000188991	ENST00000344941.3	rs3915246	intron_variant	0.00377757044603228
chr3_1179636_C_T	SLC15A5	ENSG00000188991	ENST00000344941.3	rs1527008	intron_variant	0.000749411350805535
chr3_1183981_C_T	SLC15A5	ENSG00000188991	ENST00000344941.3	rs1527009	intron_variant	0.0115013136209511
chr3_1802103_C_A	SLC15A5	ENSG00000188991	ENST00000344941.3	rs1527010	intron_variant	0.0113629034022849
chr3_1885201_A_G	SLC15A5	ENSG00000188991	ENST00000344941.3	rs7966002	intron_variant	0.000382720989027327
chr3_1885488_C_T	SLC15A5	ENSG00000188991	ENST00000344941.3	rs7979036	intron_variant	0.000613408275491263
chr3_1890519_T_C	SLC15A5	ENSG00000188991	ENST00000344941.3	rs4109312	intron_variant	0.00404467787612829
chr3_1894558_T_G	SLC15A5	ENSG00000188991	ENST00000344941.3	rs3858681	intron_variant	0.000500024217552505
chr3_1895189_G_A	SLC15A5	ENSG00000188991	ENST00000344941.3	rs3847919	intron_variant	4.94358354671277e-05
chr3_1899676_A_G	SLC15A5	ENSG00000188991	ENST00000344941.3	rs3843666	intron_variant	0.00232714967114578
chr3_2678008_C_T	SLC15A5	ENSG00000188991	ENST00000344941.3	rs4335597	intron_variant	0.0285627120228665
chr3_2788917_A_G	SLC15A5	ENSG00000188991	ENST00000344941.3	rs4598715	intron_variant	0.0216721209035199
chr3_2790634_A_G	SLC15A5	ENSG00000188991	ENST00000344941.3	rs2331819	intron_variant	0.000357306793132052
chr3_2791330_G_C	SLC15A5	ENSG00000188991	ENST00000344941.3	rs2331818	intron_variant	0.00114454068786146
chr3_2791689_A_C	SLC15A5	ENSG00000188991	ENST00000344941.3	rs3933183	intron_variant	0.00112640860626828
chr3_2792042_T_C	SLC15A5	ENSG00000188991	ENST00000344941.3	rs7957240	intron_variant	0.00262192674860591
chr3_3106774_T_C	SLC15A5	ENSG00000188991	ENST00000344941.3	rs10744107	intron_variant	0.0212247562917462
chr3_3110977_T_C	SLC15A5	ENSG00000188991	ENST00000344941.3	rs6488833	intron_variant	0.0371322439890778
chr3_3113209_A_G	SLC15A5	ENSG00000188991	ENST00000344941.3	rs10772914	intron_variant	0.00356081374068247
chr3_3114607_G_T	SLC15A5	ENSG00000188991	ENST00000344941.3	rs10846313	intron_variant	0.000639759238183967
chr3_3115367_C_T	SLC15A5	ENSG00000188991	ENST00000344941.3	rs10846314	intron_variant	0.00393324832506039
chr3_3115545_C_G	SLC15A5	ENSG00000188991	ENST00000344941.3	rs7298878	intron_variant	0.00100389850633052
chr3_3116384_C_T	SLC15A5	ENSG00000188991	ENST00000344941.3	rs7298888	intron_variant	0.00380112299432764
chr3_3117921_T_C	SLC15A5	ENSG00000188991	ENST00000344941.3	rs10846315	intron_variant	0.00687433805426635
chr3_4207034_T_G	SLC15A5	ENSG00000188991	ENST00000344941.3	rs3844371	intron_variant	0.00307549353928564
chr3_4622528_G_A	SLC15A5	ENSG00000188991	ENST00000344941.3	rs7297372	intron_variant	1.67236647167437e-07
chr3_4708805_A_G	SLC15A5	ENSG00000188991	ENST00000344941.3	rs1852450	missense_variant	0.00169763431591686
chr3_4708874_T_C	SLC15A5	ENSG00000188991	ENST00000344941.3	rs1799497	intron_variant	0.00245478668317419
chr3_4709182_G_A	SLC15A5	ENSG00000188991	ENST00000344941.3	rs7306735	intron_variant	0.00381295299250007
chr3_4709245_C_T	SLC15A5	ENSG00000188991	ENST00000344941.3	rs3915247	intron_variant	0.0051806156180221
chr3_4709356_G_T	SLC15A5	ENSG00000188991	ENST00000344941.3	rs3915248	intron_variant	0.0033457782022589
chr3_4710118_T_G	SLC15A5	ENSG00000188991	ENST00000344941.3	rs1405507	intron_variant	0.00268007271583955
chr3_6614234_G_A	SLC15A5	ENSG00000188991	ENST00000344941.3	rs11056837	intron_variant	0.00127157726436179
chr3_6803384_C_T	SLC15A5	ENSG00000188991	ENST00000344941.3	rs1358250	intron_variant	1.86108063326445e-05
chr3_7091928_A_C	SLC15A5	ENSG00000188991	ENST00000344941.3	rs3843667	intron_variant	0.0019509036647008
chr3_7324665_G_T	SLC15A5	ENSG00000188991	ENST00000344941.3	rs10744109	intron_variant	0.0250713994401087
chr3_7330148_G_A	SLC15A5	ENSG00000188991	ENST00000344941.3	rs1830187	intron_variant	0.0145974067213944
chr3_7330200_T_G	SLC15A5	ENSG00000188991	ENST00000344941.3	rs10772915	intron_variant	0.00170841480701023
chr3_7330293_G_C	SLC15A5	ENSG00000188991	ENST00000344941.3	rs1913254	intron_variant	9.21944886060311e-05
chr3_7384820_C_A	SLC15A5	ENSG00000188991	ENST00000344941.3	rs1913253	intron_variant	0.000230699059378466
chr3_7385224_T_G	SLC15A5	ENSG00000188991	ENST00000344941.3	rs7966163	intron_variant	0.000997488672757329
chr3_7390145_T_G	SLC15A5	ENSG00000188991	ENST00000344941.3	rs11056840	intron_variant	0.0037077647957446
chr3_7390864_A_T	SLC15A5	ENSG00000188991	ENST00000344941.3	rs10846316	intron_variant	0.00247024524410008
chr3_7393996_T_C	SLC15A5	ENSG00000188991	ENST00000344941.3	rs7971291	intron_variant	0.00290728117212295
chr3_7394691_G_T	SLC15A5	ENSG00000188991	ENST00000344941.3	rs7961123	intron_variant	0.000423500971525797
chr3_7395744_T_C	SLC15A5	ENSG00000188991	ENST00000344941.3	rs11056843	intron_variant	0.000218812705921585
chr3_7401227_C_T	SLC15A5	ENSG00000188991	ENST00000344941.3	rs10772916	intron_variant	0.000549409800937278
chr3_7402001_T_C	SLC15A5	ENSG00000188991	ENST00000344941.3	rs7299248	intron_variant	0.00059386385325889
chr3_7403943_C_T	SLC15A5	ENSG00000188991	ENST00000344941.3	rs7311093	intron_variant	0.00713171236348838
chr3_7407307_T_A	SLC15A5	ENSG00000188991	ENST00000344941.3	rs56057575	intron_variant	0.00243177593318631
chr3_7550142_A_C	SLC15A5	ENSG00000188991	ENST00000344941.3	rs56121788	intron_variant	0.00145796297204129
chr3_8198580_T_A	SLC15A5	ENSG00000188991	ENST00000344941.3	rs10772917	intron_variant	0.000956789736234892
chr3_9232384_C_G	SLC15A5	ENSG00000188991	ENST00000344941.3	rs1799492	intron_variant	0.0114319041768692
chr3_9232886_A_T	SLC15A5	ENSG00000188991	ENST00000344941.3	rs3915238	intron_variant	0.0178484742919198
chr3_9233035_C_T	SLC15A5	ENSG00000188991	ENST00000344941.3	rs10846317	intron_variant	0.0178484742919198
chr3_9234399_T_G	SLC15A5	ENSG00000188991	ENST00000344941.3	rs7300358	intron_variant	0.00234182237614263
chr3_9239151_G_T	SLC15A5	ENSG00000188991	ENST00000344941.3	rs1526987	intron_variant	0.0451882886157833
chr3_9835797_G_A	SLC15A5	ENSG00000188991	ENST00000344941.3	rs1798682	intron_variant	0.00157334321669183
chr3_9836099_G_A	SLC15A5	ENSG00000188991	ENST00000344941.3	rs1799487	intron_variant	0.0292464979851996
chr3_10240572_G_T	SLC15A5	ENSG00000188991	ENST00000344941.3	rs1798690	intron_variant	1.15821629868987e-05
chr3_10334227_A_G	SLC15A5	ENSG00000188991	ENST00000344941.3	rs11056845	intron_variant	5.93388931792296e-11
chr3_10335033_A_G	SLC15A5	ENSG00000188991	ENST00000344941.3	rs1799466	intron_variant	1.90685547790165e-05
chr3_10337919_T_C	SLC15A5	ENSG00000188991	ENST00000344941.3	rs12371894	intron_variant	1.10663863632492e-05
chr3_10340853_T_G	SLC15A5	ENSG00000188991	ENST00000344941.3	rs4110096	intron_variant	0.000357306793132052
chr3_10340954_A_G	SLC15A5	ENSG00000188991	ENST00000344941.3	rs1799457	intron_variant	0.00278269600802146
chr3_10341299_G_C	SLC15A5	ENSG00000188991	ENST00000344941.3	rs11056849	intron_variant	0.028143282837248
chr3_10341370_G_A	SLC15A5	ENSG00000188991	ENST00000344941.3	rs1818021	intron_variant	0.0338959445746682
chr3_11013428_A_T	SLC15A5	ENSG00000188991	ENST00000344941.3	rs1671480	intron_variant	0.0363761443651508
chr3_11018161_G_A	SLC15A5	ENSG00000188991	ENST00000344941.3	rs3847924	intron_variant	0.0420008542288606
chr3_11018936_C_G	MGST1	ENSG00000008394	ENST00000538857.1	rs10846340	intron_variant	0.0420008542288606
chr3_12466670_A_G	MGST1	ENSG00000008394	ENST00000359720.3	rs7965121	intron_variant	0.0183906547852165
chr3_14336132_G_T	PIK3C2G	ENSG00000139144	ENST00000538779.6	rs10770355	intron_variant	0.000682475806718771
chr3_14339714_T_A	PIK3C2G	ENSG00000139144	ENST00000538779.6	rs4609650	intron_variant	7.31825062706967e-08
chr3_14341069_G_A	PIK3C2G	ENSG00000139144	ENST00000538779.6	rs4643122	intron_variant	1.82358936299395e-07
chr3_14364831_C_A	AEBP2	ENSG00000139154	ENST00000512223.6	rs9300130	intron_variant	0.0362693617793407
chr3_16130525_G_A	AEBP2	ENSG00000139154	ENST00000512223.6	rs9300131	intron_variant	0.00113362747698085
chr3_16202089_G_A	AEBP2	ENSG00000139154	ENST00000512223.6	rs9300132	intron_variant	0.00033028162590055
chr3_16213287_C_T	AEBP2	ENSG00000139154	ENST00000512223.6	rs9300133	intron_variant	0.0441435068662654
chr3_16215624_G_T	AEBP2	ENSG00000139154	ENST00000512223.6	rs10161251	intron_variant	0.000136030278017527
chr3_16393833_G_A	AEBP2	ENSG00000139154	ENST00000512223.6	rs10161054	intron_variant	6.39471276507622e-07
chr3_16394565_A_G	AEBP2	ENSG00000139154	ENST00000512223.6	rs10841294	intron_variant	0.0217367757648769
chr3_16395880_C_T	AEBP2	ENSG00000139154	ENST00000512223.6	rs10770511	intron_variant	5.33687032292319e-07
chr3_16398091_G_A	AEBP2	ENSG00000139154	ENST00000512223.6	rs7488635	intron_variant	0.000463970472489254
chr3_16398099_C_T	AEBP2	ENSG00000139154	ENST00000512223.6	rs7969763	intron_variant	0.00386063362813044
chr3_16399921_T_C	AEBP2	ENSG00000139154	ENST00000512223.6	rs7960652	intron_variant	0.000314418251118209
chr3_16400011_G_C	AEBP2	ENSG00000139154	ENST00000512223.6	rs10160869	intron_variant	0.000314418251118209
chr3_16401659_T_C	AEBP2	ENSG00000139154	ENST00000512223.6	rs10161244	intron_variant	0.00302783704857253
chr3_16405919_T_C	AEBP2	ENSG00000139154	ENST00000512223.6	rs10161245	intron_variant	0.04466292296418
chr3_16407129_C_T	AEBP2	ENSG00000139154	ENST00000512223.6	rs12312898	intron_variant	0.04466292296418
chr3_16408204_G_A	AEBP2	ENSG00000139154	ENST00000512223.6	rs7312217	intron_variant	0.00243942266509224
chr3_16856401_T_C	AEBP2	ENSG00000139154	ENST00000512223.6	rs12368276	intron_variant	0.00231256681678281
chr3_16865922_T_G	AEBP2	ENSG00000139154	ENST00000512223.6	rs4296101	intron_variant	0.00179710189894087
chr3_16888548_G_A	AEBP2	ENSG00000139154	ENST00000512223.6	rs7136328	intron_variant	0.0380151091335889
chr3_17146010_T_C	AEBP2	ENSG00000139154	ENST00000512223.6	rs7307577	intron_variant	0.00182572821322039
chr3_17146423_G_A	AEBP2	ENSG00000139154	ENST00000512223.6	rs7139246	intron_variant	0.0183906547852165
chr3_17146442_A_G	RNU1146P	ENSG00000200885	ENST00000364015.1	rs11530999	non_coding_transcript_exon_variant	0.0293330846550995
chr3_21587979_A_G	SLCO1B1	ENSG00000134538	ENST00000256958.3	rs9747256	intron_variant	0.000473122688857555
chr3_21588582_C_T	ST8SIA1	ENSG00000111728	ENST00000545524.5	rs11046333	intron_variant	0.0113285555333301
chr3_21921168_A_G	SOX5	ENSG00000134532	ENST00000451604.7	rs2955528	intron_variant	2.93587830099418e-06
chr3_23331684_A_T	SOX5	ENSG00000134532	ENST00000451604.7	rs10771035	intron_variant	0.0257498953736942
chr3_23332309_A_G	SOX5	ENSG00000134532	ENST00000451604.7	rs4963720	intron_variant	0.00220600571545953
chr3_23334147_G_A	SOX5	ENSG00000134532	ENST00000429944.6	rs7978406	intron_variant	0.00174115937340526
chr3_23335200_A_C	SOX5	ENSG00000134532	ENST00000456299.2	rs577255	intron_variant	0.00174115937340526
chr3_23337476_G_C	BCAT1	ENSG00000060982	ENST00000261192.12	rs4031159	intron_variant	0.00174115937340526
chr3_23337708_T_C	IRAG2	ENSG00000118308	ENST00000636465.1	rs904090	synonymous_variant	0.00248579891533727
chr3_23338828_G_A	LMNTD1	ENSG00000152936	ENST00000543629.5	rs7306702	intron_variant	0.00174115937340526
chr3_23340569_C_A	PPFIBP1	ENSG00000110841	ENST00000228425.11	rs7965940	intron_variant	0.00248579891533727
chr3_23346799_T_C	PPFIBP1	ENSG00000110841	ENST00000228425.11	rs7966058	intron_variant	0.00248579891533727
chr3_23346933_T_C	PPFIBP1	ENSG00000110841	ENST00000228425.11	rs10842936	intron_variant	0.00248579891533727
chr3_23348730_G_A	PPFIBP1	ENSG00000110841	ENST00000228425.11	rs10431269	intron_variant	0.00248579891533727
chr3_23351752_C_G	PPFIBP1	ENSG00000110841	ENST00000228425.11	rs7953859	intron_variant	0.00248579891533727
chr3_23352022_T_C	PPFIBP1	ENSG00000110841	ENST00000228425.11	rs9300175	intron_variant	0.00248579891533727
chr3_23352090_C_T	PPFIBP1	ENSG00000110841	ENST00000228425.11	rs12369763	intron_variant	0.00248579891533727
chr3_23422323_A_G	LINC02422	ENSG00000255760	ENST00000662662.1	rs1797791	intron_variant	0.00034353412995338
chr3_23423644_G_A	BICD1	ENSG00000151746	ENST00000652176.1	rs326643	intron_variant	0.000563853344054073
chr3_23431855_T_C	BICD1	ENSG00000151746	ENST00000652176.1	rs2593993	intron_variant	0.000204118355044565
chr3_23440647_A_T	LINC02406	ENSG00000258144	ENST00000659930.1	rs718150	intron_variant	5.23644779674747e-06
chr3_23440810_T_C	LINC02406	ENSG00000258144	ENST00000659930.1	rs1463209	intron_variant	6.47631167027157e-08
chr3_23442045_G_A	LINC02406	ENSG00000258144	ENST00000659930.1	rs7959675	intron_variant	4.91000189922951e-05
chr3_23442203_G_A	LINC02406	ENSG00000258144	ENST00000659930.1	rs1449844	intron_variant	1.52174250382746e-06
chr3_23443336_A_G	LINC02406	ENSG00000258144	ENST00000659930.1	rs12817660	intron_variant	6.51030379220189e-05
chr3_23445609_A_C	SLC2A13	ENSG00000151229	ENST00000280871.9	rs555740	intron_variant	0.0278120660567809
chr3_23447095_A_C	ARID2	ENSG00000189079	ENST00000334344.11	rs10880859	intron_variant	1.06103351740848e-05
chr3_23448719_T_C	SLC38A1	ENSG00000111371	ENST00000398637.10	rs3742059	3_prime_UTR_variant	6.51030379220189e-05
chr3_23452740_A_G	LIMA1	ENSG00000050405	ENST00000341247.9	rs11169300	intron_variant	6.51030379220189e-05
chr3_23462648_C_T	LINC00592	ENSG00000258279	ENST00000640420.1	rs7959177	intron_variant	6.51030379220189e-05
chr3_23463696_G_C	LINC02874	ENSG00000257137	ENST00000639627.1	rs7132546	non_coding_transcript_exon_variant	4.43232238909036e-05
chr3_23489408_A_G	ITGA7	ENSG00000135424	ENST00000553737.5	rs4759189	intron_variant	6.51030379220189e-05
chr3_23493968_T_C	PRIM1	ENSG00000198056	ENST00000338193.11	rs2035082	intron_variant	0.00893966681345972
chr3_23507584_C_T	TAFA2	ENSG00000198673	ENST00000416284.8	rs10877778	intron_variant	0.0013295459542582
chr3_23509164_A_G	TAFA2	ENSG00000198673	ENST00000416284.8	rs1838380	intron_variant	0.000627462430057711
chr3_23514513_A_G	SRGAP1	ENSG00000196935	ENST00000355086.8	rs7964863	3_prime_UTR_variant	0.00196945720657355
chr3_23514810_G_A	C12orf56	ENSG00000185306	ENST00000543942.7	rs7487463	intron_variant	1.2733497925305e-06
chr3_23518056_A_G	C12orf56	ENSG00000185306	ENST00000543942.7	rs11175369	intron_variant	0.00395774835827291
chr3_23518170_G_T	C12orf56	ENSG00000185306	ENST00000543942.7	rs12823963	intron_variant	0.00395774835827291
chr3_23518519_T_C	C12orf56	ENSG00000185306	ENST00000543942.7	rs11838014	intron_variant	3.90983275321174e-06
chr3_23519592_G_T	C12orf56	ENSG00000185306	ENST00000543942.7	rs6421214	intron_variant	3.90983275321174e-06
chr3_23520459_G_C	C12orf56	ENSG00000185306	ENST00000543942.7	rs12810522	intron_variant	4.77395629987165e-06
chr3_23526489_A_C	XPOT	ENSG00000184575	ENST00000332707.10	rs6581561	intron_variant	5.89644006669323e-07
chr3_23531115_A_G	XPOT	ENSG00000184575	ENST00000332707.10	rs11175388	intron_variant	0.00136382280657424
chr3_23532959_A_G	XPOT	ENSG00000184575	ENST00000332707.10	rs10878171	intron_variant	4.89437033173599e-06
chr3_23535476_G_A	XPOT	ENSG00000184575	ENST00000332707.10	rs7980497	intron_variant	7.46231539084537e-06
chr3_23539409_A_G	XPOT	ENSG00000184575	ENST00000332707.10	rs61931553	intron_variant	3.11534870086455e-07
chr3_23540972_T_C	XPOT	ENSG00000184575	ENST00000332707.10	rs61504973	intron_variant	3.42263739063785e-08
chr3_23543413_G_A	XPOT	ENSG00000184575	ENST00000332707.10	rs55795513	intron_variant	0.000277494869340201
chr3_23546634_T_C	TBK1	ENSG00000183735	ENST00000331710.10	rs10878178	intron_variant	3.74022401437466e-08
chr3_23553731_G_A	TBK1	ENSG00000183735	ENST00000331710.10	rs10878179	intron_variant	1.59527126824941e-06
chr3_23568757_C_T	GRIP1	ENSG00000155974	ENST00000540433.5	rs1842321	intron_variant	8.5809114782742e-07
chr3_23571253_A_G	GRIP1	ENSG00000155974	ENST00000540433.5	rs2046064	intron_variant	3.8477176284282e-09
chr3_23577961_A_G	GRIP1	ENSG00000155974	ENST00000540433.5	rs1480021	intron_variant	7.5531947878417e-09
chr3_23578842_A_G	GRIP1	ENSG00000155974	ENST00000540433.5	rs1480020	intron_variant	2.89850693421033e-08
chr3_23588292_A_G	GRIP1	ENSG00000155974	ENST00000540433.5	rs1383106	intron_variant	3.25785993664506e-07
chr3_23591307_C_T	GRIP1	ENSG00000155974	ENST00000540433.5	rs4144507	intron_variant	2.81839471703106e-05
chr3_23593143_G_T	GRIP1	ENSG00000155974	ENST00000540433.5	rs1351331	intron_variant	4.89437033173599e-06
chr3_23593580_A_G	GRIP1	ENSG00000155974	ENST00000540433.5	rs1480017	intron_variant	1.19529875340375e-05
chr3_23593916_C_A	GRIP1	ENSG00000155974	ENST00000540433.5	rs7306987	intron_variant	2.81839471703106e-05
chr3_23594637_G_C	GRIP1	ENSG00000155974	ENST00000540433.5	rs10878502	intron_variant	0.00238638501102955
chr3_23596637_A_G	GRIP1	ENSG00000155974	ENST00000540433.5	rs10784584	intron_variant	3.14300248635965e-06
chr3_23596702_G_C	GRIP1	ENSG00000155974	ENST00000540433.5	rs10878504	intron_variant	3.14300248635965e-06
chr3_23596817_C_G	GRIP1	ENSG00000155974	ENST00000540433.5	rs7134709	intron_variant	3.14300248635965e-06
chr3_23596859_G_C	GRIP1	ENSG00000155974	ENST00000540433.5	rs1351332	intron_variant	4.62340582716919e-06
chr3_23597136_A_G	GRIP1	ENSG00000155974	ENST00000540433.5	rs7962776	intron_variant	3.14300248635965e-06
chr3_23597574_T_G	GRIP1	ENSG00000155974	ENST00000540433.5	rs10878506	intron_variant	7.51519625844506e-06
chr3_23597630_G_A	GRIP1	ENSG00000155974	ENST00000540433.5	rs7302289	intron_variant	3.14300248635965e-06
chr3_23597647_C_G	GRIP1	ENSG00000155974	ENST00000540433.5	rs7302709	intron_variant	3.14300248635965e-06
chr3_23597802_C_T	LINC02384	ENSG00000251301	ENST00000693550.1	rs11177232	intron_variant	4.15368774185781e-05
chr3_24740154_G_C	CPSF6	ENSG00000111605	ENST00000435070.7	rs1350166	intron_variant	0.0276478850941706
chr3_24752367_A_C	CPSF6	ENSG00000111605	ENST00000435070.7	rs7135092	intron_variant	7.34622779688998e-08
chr3_24912829_G_A	CPSF6	ENSG00000111605	ENST00000435070.7	rs7308481	intron_variant	0.031394945523105
chr3_30687737_G_C	YEATS4	ENSG00000127337	ENST00000548020.5	rs2249093	5_prime_UTR_variant	1.09250331687663e-06
chr3_31823730_C_T	YEATS4	ENSG00000127337	ENST00000247843.7	rs623853	intron_variant	0.01442276088223
chr3_32972643_C_T	YEATS4	ENSG00000127337	ENST00000247843.7	rs554591	intron_variant	0.00935722130576369
chr3_34210238_C_T	YEATS4	ENSG00000127337	ENST00000247843.7	rs634512	intron_variant	0.026524771100463
chr3_34212974_C_T	YEATS4	ENSG00000127337	ENST00000247843.7	rs11177615	intron_variant	0.0341967179010965
chr3_34216268_G_A	YEATS4	ENSG00000127337	ENST00000247843.7	rs12811632	intron_variant	0.00513288454115328
chr3_34216523_G_A	YEATS4	ENSG00000127337	ENST00000247843.7	rs685934	intron_variant	0.00513288454115328
chr3_34218267_A_G	YEATS4	ENSG00000127337	ENST00000247843.7	rs6581889	intron_variant	0.00513288454115328
chr3_34218342_A_G	YEATS4	ENSG00000127337	ENST00000247843.7	rs642786	intron_variant	0.00513288454115328
chr3_34220264_C_T	YEATS4	ENSG00000127337	ENST00000247843.7	rs7303212	intron_variant	0.00218527684290731
chr3_34222892_T_C	YEATS4	ENSG00000127337	ENST00000247843.7	rs11177619	intron_variant	0.00143955476169637
chr3_34225911_G_A	YEATS4	ENSG00000127337	ENST00000247843.7	rs315131	intron_variant	0.00218527684290731
chr3_34229565_T_C	YEATS4	ENSG00000127337	ENST00000247843.7	rs315134	intron_variant	0.00294386687938074
chr3_34229799_T_C	YEATS4	ENSG00000127337	ENST00000247843.7	rs2291005	intron_variant	0.000836092266242039
chr3_34231859_A_G	YEATS4	ENSG00000127337	ENST00000247843.7	rs315138	intron_variant	0.00513288454115328
chr3_34236162_A_G	YEATS4	ENSG00000127337	ENST00000247843.7	rs11177628	intron_variant	0.00513288454115328
chr3_34236402_C_G	YEATS4	ENSG00000127337	ENST00000247843.7	rs528974	intron_variant	0.00513288454115328
chr3_34242205_G_T	YEATS4	ENSG00000127337	ENST00000247843.7	rs630725	intron_variant	0.000691347989204432
chr3_34244068_A_T	YEATS4	ENSG00000127337	ENST00000247843.7	rs11561378	intron_variant	0.0115711340907373
chr3_34248544_A_G	YEATS4	ENSG00000127337	ENST00000247843.7	rs11177630	intron_variant	0.00544259305413582
chr3_34252460_T_C	YEATS4	ENSG00000127337	ENST00000247843.7	rs4435046	intron_variant	0.00781699185334172
chr3_34255190_G_A	YEATS4	ENSG00000127337	ENST00000247843.7	rs4622313	intron_variant	0.000271172475215783
chr3_34256537_G_A	YEATS4	ENSG00000127337	ENST00000247843.7	rs11177631	intron_variant	0.00781699185334172
chr3_34257371_A_G	YEATS4	ENSG00000127337	ENST00000247843.7	rs315124	intron_variant	0.0181175873591142
chr3_34374384_G_T	YEATS4	ENSG00000127337	ENST00000247843.7	rs28778648	intron_variant	0.00193252099503773
chr3_34375008_C_A	YEATS4	ENSG00000127337	ENST00000247843.7	rs11177632	intron_variant	0.0162648938471932
chr3_34375484_T_C	YEATS4	ENSG00000127337	ENST00000247843.7	rs7133487	intron_variant	4.25428434190901e-05
chr3_34375777_G_A	YEATS4	ENSG00000127337	ENST00000247843.7	rs7304714	intron_variant	3.73552315000543e-05
chr3_34376112_A_G	YEATS4	ENSG00000127337	ENST00000247843.7	rs2870902	intron_variant	5.9404531326473e-05
chr3_34376444_C_T	YEATS4	ENSG00000127337	ENST00000247843.7	rs56054057	intron_variant	3.73552315000543e-05
chr3_34377282_G_A	YEATS4	ENSG00000127337	ENST00000247843.7	rs4761237	intron_variant	3.07166170847109e-05
chr3_34380066_C_T	YEATS4	ENSG00000127337	ENST00000247843.7	rs2603089	intron_variant	0.0154091708732144
chr3_34380151_C_A	YEATS4	ENSG00000127337	ENST00000247843.7	rs4761239	intron_variant	0.0154091708732144
chr3_34380253_A_G	YEATS4	ENSG00000127337	ENST00000247843.7	rs2603090	intron_variant	4.29812501999578e-05
chr3_34380678_G_A	YEATS4	ENSG00000127337	ENST00000247843.7	rs7980883	intron_variant	0.000248900640133558
chr3_34380732_A_C	YEATS4	ENSG00000127337	ENST00000247843.7	rs1478464	intron_variant	0.0463924584033338
chr3_34381248_C_T	YEATS4	ENSG00000127337	ENST00000247843.7	rs4761157	intron_variant	0.0348060840523112
chr3_34381507_A_T	YEATS4	ENSG00000127337	ENST00000247843.7	rs10878974	intron_variant	0.0348060840523112
chr3_34384548_T_C	YEATS4	ENSG00000127337	ENST00000247843.7	rs10878975	intron_variant	0.000214511753138566
chr3_34384557_T_G	YEATS4	ENSG00000127337	ENST00000247843.7	rs7968629	intron_variant	0.0161675717830538
chr3_34393717_G_C	TSPAN8	ENSG00000127324	ENST00000393330.6	rs1630708	intron_variant	0.000341289785020416
chr3_34393818_G_A	TSPAN8	ENSG00000127324	ENST00000393330.6	rs17226898	intron_variant	0.024410337708399
chr3_34395834_T_G	TSPAN8	ENSG00000127324	ENST00000393330.6	rs1390204	intron_variant	0.0348060840523112
chr3_34397059_A_G	TSPAN8	ENSG00000127324	ENST00000393330.6	rs1705244	intron_variant	0.0161675717830538
chr3_34407469_T_C	TSPAN8	ENSG00000127324	ENST00000393330.6	rs10784911	intron_variant	0.0161675717830538
chr3_34407609_A_T	TSPAN8	ENSG00000127324	ENST00000393330.6	rs10784912	intron_variant	0.0161675717830538
chr3_34410910_C_T	TSPAN8	ENSG00000127324	ENST00000393330.6	rs10784915	intron_variant	0.0026969159953968
chr3_34413027_G_C	TSPAN8	ENSG00000127324	ENST00000393330.6	rs11178744	intron_variant	0.0212881099746811
chr3_34413062_G_A	TRHDE	ENSG00000072657	ENST00000548156.1	rs2367895	intron_variant	0.0130576067276981
chr3_34417337_A_G	TRHDE	ENSG00000072657	ENST00000548156.1	rs7976923	intron_variant	0.0115013136209511
chr3_34429502_G_A	E2F7	ENSG00000165891	ENST00000322886.12	rs2279575	3_prime_UTR_variant	0.0454532231818273
chr3_34431260_T_A	LINC02464	ENSG00000257677	ENST00000552060.2	rs35633770	intron_variant	0.003123882549683
chr3_34431936_G_T	NAV3	ENSG00000067798	ENST00000550042.2	rs7308213	intron_variant	0.018892322025773
chr3_34440571_G_A	NAV3	ENSG00000067798	ENST00000550042.2	rs7970734	intron_variant	0.000243217067042176
chr3_34442043_T_C	NAV3	ENSG00000067798	ENST00000397909.7	rs10506773	intron_variant	0.00295308335795916
chr3_34450475_G_A	NAV3	ENSG00000067798	ENST00000397909.7	rs1448752	intron_variant	0.000846913393643718
chr3_34452860_T_A	NAV3	ENSG00000067798	ENST00000397909.7	rs1448751	intron_variant	0.0416334019386752
chr3_34453686_A_G	NAV3	ENSG00000067798	ENST00000397909.7	rs387311	intron_variant	0.00755857136066677
chr3_34455299_G_A	NAV3	ENSG00000067798	ENST00000397909.7	rs2122066	intron_variant	9.72935622201844e-05
chr3_34456426_C_G	NAV3	ENSG00000067798	ENST00000397909.7	rs300504	intron_variant	0.00114089158416929
chr3_34457838_G_T	NAV3	ENSG00000067798	ENST00000397909.7	rs300503	intron_variant	5.98093131507839e-05
chr3_34458431_T_C	NAV3	ENSG00000067798	ENST00000397909.7	rs300501	intron_variant	0.00241655267257661
chr3_34460754_G_T	NAV3	ENSG00000067798	ENST00000397909.7	rs300500	intron_variant	0.0455862570417178
chr3_34460992_T_A	NAV3	ENSG00000067798	ENST00000397909.7	rs2442133	intron_variant	0.000123047556367792
chr3_34461741_T_A	LINC02424	ENSG00000258220	ENST00000548512.1	rs10437886	intron_variant	0.00484040698210933
chr3_34466592_T_C	SYT1	ENSG00000067715	ENST00000261205.9	rs7484765	intron_variant	0.0061743613062532
chr3_34469251_A_G	PAWR	ENSG00000177425	ENST00000328827.9	rs10746140	intron_variant	0.00262192674860591
chr3_34470660_C_G	PTPRQ	ENSG00000139304	ENST00000644991.3	rs4842285	intron_variant	0.00676979494780043
chr3_34472138_C_T	LIN7A	ENSG00000111052	ENST00000552864.6	rs2400837	intron_variant	0.0142931153983528
chr3_34474911_A_T	LIN7A	ENSG00000111052	ENST00000552864.6	rs12298708	intron_variant	4.18218912915111e-05
chr3_34484885_G_A	LIN7A	ENSG00000111052	ENST00000552864.6	rs7966199	intron_variant	7.40404864714306e-05
chr3_34485307_A_C	LIN7A	ENSG00000111052	ENST00000552864.6	rs10862191	intron_variant	8.81906458911624e-20
chr3_34486317_C_G	LIN7A	ENSG00000111052	ENST00000552864.6	rs17662029	intron_variant	0.000279327626910957
chr3_34487605_A_G	LIN7A	ENSG00000111052	ENST00000552864.6	rs7312276	intron_variant	5.98093131507839e-05
chr3_34488076_C_A	LIN7A	ENSG00000111052	ENST00000552864.6	rs17729769	intron_variant	9.31301837314669e-05
chr3_34491421_G_A	LINC01619	ENSG00000257242	ENST00000549802.5	rs4608114	intron_variant	0.00287113980974629
chr3_34492005_A_G	CRADD	ENSG00000169372	ENST00000332896.8	rs4761744	intron_variant	0.00287113980974629
chr3_34495687_T_C	PGAM1P5	ENSG00000257150	ENST00000552554.1	rs4762595	intron_variant	0.00109447615127695
chr3_34497020_T_C	PGAM1P5	ENSG00000257150	ENST00000552554.1	rs11108172	intron_variant	0.0377924950321978
chr3_34499291_A_G	PGAM1P5	ENSG00000257150	ENST00000552554.1	rs11108173	intron_variant	0.000975367921848465
chr3_34499881_T_C	PGAM1P5	ENSG00000257150	ENST00000552554.1	rs11108174	intron_variant	0.00150978033791215
chr3_34500012_A_C	PGAM1P5	ENSG00000257150	ENST00000552554.1	rs11108175	intron_variant	0.0023938922425834
chr3_34513625_C_G	PGAM1P5	ENSG00000257150	ENST00000552554.1	rs4762596	intron_variant	0.0127846696821099
chr3_34633154_T_C	NTN4	ENSG00000074527	ENST00000343702.9	rs2160989	3_prime_UTR_variant	2.63583669908946e-06
chr3_36638607_G_T	NTN4	ENSG00000074527	ENST00000343702.9	rs1052651	3_prime_UTR_variant	0.0463924584033338
chr3_36639752_A_G	NTN4	ENSG00000074527	ENST00000343702.9	rs10859920	intron_variant	0.00904920231213057
chr3_36640411_G_C	NTN4	ENSG00000074527	ENST00000343702.9	rs10859921	intron_variant	0.000132442543844675
chr3_36640888_C_T	NTN4	ENSG00000074527	ENST00000343702.9	rs10777716	intron_variant	0.00578830396843903
chr3_36641415_A_G	NTN4	ENSG00000074527	ENST00000343702.9	rs4762597	intron_variant	0.00333536614536506
chr3_36641785_C_G	NTN4	ENSG00000074527	ENST00000343702.9	rs4762233	intron_variant	0.00578830396843903
chr3_36642409_T_C	NTN4	ENSG00000074527	ENST00000343702.9	rs4528408	intron_variant	0.00578830396843903
chr3_36642899_G_A	NTN4	ENSG00000074527	ENST00000343702.9	rs2367559	intron_variant	0.00260554125462615
chr3_37212454_G_A	NTN4	ENSG00000074527	ENST00000343702.9	rs7979729	intron_variant	1.79146798632302e-06
chr3_37515292_A_T	NTN4	ENSG00000074527	ENST00000343702.9	rs11108189	intron_variant	0.0350115467867435
chr3_37538155_T_A	NTN4	ENSG00000074527	ENST00000343702.9	rs9788093	intron_variant	0.0175306799374678
chr3_37538243_G_A	NTN4	ENSG00000074527	ENST00000343702.9	rs10735332	intron_variant	0.0175306799374678
chr3_37546956_A_G	ANKS1B	ENSG00000185046	ENST00000683438.2	rs7134519	intron_variant	0.0180094707477972
chr3_37547083_C_T	ANKS1B	ENSG00000185046	ENST00000683438.2	rs10860363	intron_variant	0.0180094707477972
chr3_37547412_C_T	ANKS1B	ENSG00000185046	ENST00000683438.2	rs7313850	intron_variant	0.0180094707477972
chr3_37547471_C_G	NR1H4	ENSG00000012504	ENST00000392986.8	rs4764980	intron_variant	0.0180094707477972
chr3_37547547_A_C	LINC02401	ENSG00000257762	ENST00000666598.1	rs10450754	intron_variant	0.0180094707477972
chr3_37547753_G_A	LINC02401	ENSG00000257762	ENST00000666598.1	rs34212972	intron_variant	0.0158790000909364
chr3_37671946_C_T	LINC02401	ENSG00000257762	ENST00000666598.1	rs10745971	intron_variant	0.000648087783670597
chr3_38577784_A_G	LINC02401	ENSG00000257762	ENST00000666598.1	rs10861040	intron_variant	0.012255386894419
chr3_38577785_C_G	LINC02401	ENSG00000257762	ENST00000666598.1	rs10745972	intron_variant	0.012255386894419
chr3_39430956_G_A	LINC02401	ENSG00000257762	ENST00000666598.1	rs1346412	intron_variant	0.0122184098379816
chr3_39431034_C_T	LINC02401	ENSG00000257762	ENST00000666598.1	rs7958280	non_coding_transcript_exon_variant	0.000339059796979552
chr3_39431138_G_A	STAB2	ENSG00000136011	ENST00000388887.7	rs1018033	intron_variant	0.000339059796979552
chr3_39431299_G_A	HCFC2	ENSG00000111727	ENST00000229330.9	rs2264841	intron_variant	0.000420746330771493
chr3_39431610_A_T	HCFC2	ENSG00000111727	ENST00000229330.9	rs2723854	intron_variant	0.000339059796979552
chr3_39431733_C_T	HCFC2	ENSG00000111727	ENST00000229330.9	rs2253274	splice_polypyrimidine_tract_variant	0.000339059796979552
chr3_39432100_A_G	HCFC2	ENSG00000111727	ENST00000229330.9	rs2700511	intron_variant	0.000339059796979552
chr3_39432921_A_G	HCFC2	ENSG00000111727	ENST00000229330.9	rs2723866	intron_variant	0.0122184098379816
chr3_39432934_T_C	NFYB	ENSG00000120837	ENST00000240055.8	rs7310193	intron_variant	0.0122184098379816
chr3_39443232_A_G	TXNRD1	ENSG00000198431	ENST00000525566.6	rs7306728	intron_variant	0.000339059796979552
chr3_39443749_G_C	TXNRD1	ENSG00000198431	ENST00000525566.6	rs11111941	intron_variant	0.000339059796979552
chr3_39445109_C_G	TXNRD1	ENSG00000198431	ENST00000525566.6	rs7302834	intron_variant	0.000518222843408902
chr3_39445432_T_A	TXNRD1	ENSG00000198431	ENST00000525566.6	rs11111950	intron_variant	0.0351147207123741
chr3_39446855_A_G	TXNRD1	ENSG00000198431	ENST00000525566.6	rs11111953	intron_variant	0.000339059796979552
chr3_39446961_T_C	TXNRD1	ENSG00000198431	ENST00000525566.6	rs7297584	intron_variant	3.21205062562902e-05
chr3_39448128_C_A	C12orf75	ENSG00000235162	ENST00000443585.6	rs10861401	intron_variant	0.000518222843408902
chr3_39448386_C_A	CKAP4	ENSG00000136026	ENST00000552828.5	rs7973905	intron_variant	0.000339059796979552
chr3_39448388_C_T	PRDM4	ENSG00000110851	ENST00000228437.10	rs11836200	intron_variant	0.000339059796979552
chr3_39448570_C_T	SVOP	ENSG00000166111	ENST00000610966.5	rs10861979	intron_variant	3.21205062562902e-05
chr3_39448605_G_A	IFT81	ENSG00000122970	ENST00000242591.10	rs531190544	intron_variant	3.21205062562902e-05
chr3_39449793_T_C	LINC01405	ENSG00000185847	ENST00000553177.6	rs10849920	intron_variant	0.000542324438756551
chr3_39449989_G_A	LINC01234	ENSG00000249550	ENST00000661760.1	rs7301686	intron_variant	0.000542324438756551
chr3_39450076_C_T	LINC01234	ENSG00000249550	ENST00000661760.1	rs11066661	intron_variant	0.000542324438756551
chr3_39959162_A_C	LINC02463	ENSG00000257683	ENST00000546414.1	rs2460490	intron_variant	0.0021108869910682
chr3_39979655_C_A	LINC02463	ENSG00000257683	ENST00000546414.1	rs7970040	intron_variant	0.000698076084228146
chr3_40048352_A_C	LINC02463	ENSG00000257683	ENST00000546414.1	rs697867	intron_variant	3.16215741206158e-07
chr3_40056364_T_C	LINC02463	ENSG00000257683	ENST00000546414.1	rs697868	intron_variant	1.44365531392789e-07
chr3_40060304_C_T	LINC02463	ENSG00000257683	ENST00000546414.1	rs697869	intron_variant	4.95296273455305e-08
chr3_40060823_T_C	LINC02463	ENSG00000257683	ENST00000546414.1	rs1066688	intron_variant	6.80618033019882e-08
chr3_40061629_T_C	LINC02463	ENSG00000257683	ENST00000546414.1	rs697871	intron_variant	9.96064643976293e-06
chr3_40061772_T_C	LINC02463	ENSG00000257683	ENST00000546414.1	rs708841	intron_variant	7.00253679790314e-06
chr3_40063047_A_G	LINC02463	ENSG00000257683	ENST00000546414.1	rs697888	intron_variant	8.58857895948105e-08
chr3_40066845_T_C	GCN1	ENSG00000089154	ENST00000300648.7	rs2240312	intron_variant	2.41582038904278e-08
chr3_40066871_C_T	GCN1	ENSG00000089154	ENST00000300648.7	rs2240324	intron_variant	3.63748757329265e-10
chr3_40068113_G_A	GCN1	ENSG00000089154	ENST00000300648.7	rs7974732	intron_variant	2.41582038904278e-08
chr3_40072904_A_G	GCN1	ENSG00000089154	ENST00000300648.7	rs11065040	intron_variant	1.73763626149735e-14
chr3_40073008_T_C	PXNAS1	ENSG00000255857	ENST00000542265.7	rs7960120	intron_variant	1.73763626149735e-14
chr3_40074938_A_C	PXN	ENSG00000089159	ENST00000637617.2	rs3742039	3_prime_UTR_variant	8.72825776003472e-15
chr3_40076445_A_G	PXN	ENSG00000089159	ENST00000637617.2	rs2239206	intron_variant	8.72825776003472e-15
chr3_40077125_G_A	HNF1AAS1	ENSG00000241388	ENST00000619441.1	rs142632970	intron_variant	2.2414737423058e-14
chr3_40081132_G_A	NCOR2	ENSG00000196498	ENST00000405201.5	rs73223568	intron_variant	1.38749578015003e-09
chr3_40084697_A_G	NCOR2	ENSG00000196498	ENST00000405201.5	rs967500	intron_variant	1.34875703180204e-11
chr3_40085408_C_T	SCARB1	ENSG00000073060	ENST00000261693.11	rs11057820	intron_variant	1.34875703180204e-11
chr3_40987551_A_G	TMEM132C	ENSG00000181234	ENST00000435159.3	rs34369666	intron_variant	4.2964669025602e-08
chr3_40987596_G_A	TMEM132C	ENSG00000181234	ENST00000435159.3	rs4882790	intron_variant	0.000344661714468326
chr3_42453858_T_G	SLC15A4	ENSG00000139370	ENST00000266771.10	rs11059924	synonymous_variant	0.0319556332805209
chr3_42457115_G_T	TMEM132D	ENSG00000151952	ENST00000422113.7	rs12309523	intron_variant	3.35872781094909e-05
chr3_42457201_C_T	RIMBP2	ENSG00000060709	ENST00000690449.1	rs111065096	intron_variant	3.35872781094909e-05
chr3_42459376_C_T	RIMBP2	ENSG00000060709	ENST00000690449.1	rs4759683	intron_variant	3.35872781094909e-05
chr3_42471237_T_C	RIMBP2	ENSG00000060709	ENST00000690449.1	rs10848102	intron_variant	6.90420541105953e-06
chr3_42471429_A_G	RIMBP2	ENSG00000060709	ENST00000690449.1	rs34002774	intron_variant	6.90420541105953e-06
chr3_42474229_C_G	RIMBP2	ENSG00000060709	ENST00000691977.1	rs4759771	intron_variant	0.00630854747258804
chr3_42476515_T_G	ADGRD1	ENSG00000111452	ENST00000261654.10	rs819118	intron_variant	0.0081087404515602
chr3_42476887_G_A	ADGRD1	ENSG00000111452	ENST00000261654.10	rs368731179	intron_variant	0.0137858042827223
chr3_45952114_T_C	FBRSL1	ENSG00000112787	ENST00000680143.1	rs7315900	intron_variant	0.00228366851554182
chr3_46059612_T_A	LINC00539	ENSG00000224429	ENST00000434601.7	rs9578362	intron_variant	0.0064455788854617
chr3_46060282_T_A	MICU2	ENSG00000165487	ENST00000382374.9	rs61952264	intron_variant	0.0064455788854617
chr3_46061294_T_G	TNFRSF19	ENSG00000127863	ENST00000248484.9	rs880624	intron_variant	0.00070714661051539
chr3_46065040_A_G	MIPEP	ENSG00000027001	ENST00000382172.4	rs4769291	intron_variant	0.00419805764622235
chr3_46131411_A_G	MIPEP	ENSG00000027001	ENST00000382172.4	rs1326130	intron_variant	0.00788895378689747
chr3_54089623_A_G	NUP58	ENSG00000139496	ENST00000695577.1	rs9511763	intron_variant	0.00179710189894087
chr3_54102117_T_C	NUP58	ENSG00000139496	ENST00000695577.1	rs58681281	intron_variant	0.023907952387226
chr3_54208304_T_C	ATP8A2	ENSG00000132932	ENST00000381655.7	rs2249800	intron_variant	0.0209731742868139
chr3_54855017_T_C	ATP8A2	ENSG00000132932	ENST00000381655.7	rs1750499	intron_variant	7.40552390402923e-09
chr3_54883029_G_T	ATP8A2	ENSG00000132932	ENST00000381655.7	rs11616806	intron_variant	0.0232076992729552
chr3_54897535_T_C	ATP8A2	ENSG00000132932	ENST00000381655.7	rs306421	intron_variant	5.97639854207404e-08
chr3_54898261_C_T	ATP8A2	ENSG00000132932	ENST00000381655.7	rs306420	intron_variant	0.000348066252465779
chr3_54900376_A_G	ATP8A2	ENSG00000132932	ENST00000381655.7	rs2765743	intron_variant	4.85878689547675e-08
chr3_54903977_T_G	ATP8A2	ENSG00000132932	ENST00000381655.7	rs2765744	intron_variant	7.29037835349018e-08
chr3_54917811_C_T	RPS20P32	ENSG00000218198	ENST00000456044.1	rs2479559	non_coding_transcript_exon_variant	0.00630854747258804
chr3_54937512_A_C	USP12	ENSG00000152484	ENST00000282344.11	rs9512533	3_prime_UTR_variant	0.000449100418354873
chr3_54939860_G_A	USP12	ENSG00000152484	ENST00000282344.11	rs9512534	intron_variant	0.000537069176289666
chr3_54942974_A_C	USP12	ENSG00000152484	ENST00000282344.11	rs9901	intron_variant	0.000648087783670597
chr3_54949945_G_A	USP12	ENSG00000152484	ENST00000282344.11	rs7984570	intron_variant	6.59389987335472e-06
chr3_54950170_A_G	USP12	ENSG00000152484	ENST00000282344.11	rs9512535	intron_variant	2.5795502135528e-06
chr3_54950358_G_A	USP12	ENSG00000152484	ENST00000282344.11	rs9551356	intron_variant	4.75699355052099e-06
chr3_54950418_C_G	USP12	ENSG00000152484	ENST00000282344.11	rs9512542	intron_variant	1.01727471429453e-05
chr3_54951424_C_T	USP12	ENSG00000152484	ENST00000282344.11	rs7320132	intron_variant	7.13364505810653e-05
chr3_55303068_G_A	USP12	ENSG00000152484	ENST00000282344.11	rs9512555	intron_variant	0.00339831660728991
chr3_55310502_T_C	USP12	ENSG00000152484	ENST00000282344.11	rs9507845	intron_variant	0.015736603817991
chr3_55313023_A_G	USP12	ENSG00000152484	ENST00000282344.11	rs9553973	intron_variant	0.00848839950367862
chr3_56625904_A_G	USP12	ENSG00000152484	ENST00000282344.11	rs9507846	intron_variant	4.18423078078368e-06
chr3_56683955_A_C	USP12	ENSG00000152484	ENST00000282344.11	rs7998437	intron_variant	0.00563015955429608
chr3_56690331_C_G	USP12	ENSG00000152484	ENST00000282344.11	rs7981803	intron_variant	0.0172184047653525
chr3_56763740_T_G	USP12	ENSG00000152484	ENST00000282344.11	rs9512561	intron_variant	0.000188506262818796
chr3_56770229_T_A	POLR1D	ENSG00000186184	ENST00000636817.1	rs8000839	intron_variant	0.00462105876859268
chr3_56770982_G_A	POLR1D	ENSG00000186184	ENST00000636817.1	rs2181431	intron_variant	1.73400915622491e-06
chr3_56774742_T_C	POLR1D	ENSG00000186184	ENST00000636817.1	rs9512800	intron_variant	0.0450563858244163
chr3_56775792_A_G	FLT3	ENSG00000122025	ENST00000241453.12	rs9581978	intron_variant	0.000375284547337769
chr3_56780129_C_G	MTUS2	ENSG00000132938	ENST00000612955.6	rs1889718	intron_variant	0.0124795522610567
chr3_56781592_C_A	HMGB1	ENSG00000189403	ENST00000341423.10	rs139784637	intron_variant	0.00141236778070348
chr3_56781966_C_T	FRY	ENSG00000073910	ENST00000542859.6	rs2428250	intron_variant	0.00702334989134011
chr3_56782814_C_A	NBEA	ENSG00000172915	ENST00000379939.7	rs9530151	intron_variant	0.0160226524857022
chr3_56786805_C_T	DCLK1	ENSG00000133083	ENST00000360631.8	rs59473294	intron_variant	0.00229085983159515
chr3_56787290_T_C	DCLK1	ENSG00000133083	ENST00000360631.8	rs12867287	intron_variant	0.0117474990845203
chr3_56787498_G_A	DCLK1	ENSG00000133083	ENST00000360631.8	rs7995328	intron_variant	0.0396095645428655
chr3_56787685_G_C	DCLK1	ENSG00000133083	ENST00000360631.8	rs9546069	intron_variant	0.0399596118060729
chr3_56787864_A_G	LINC02334	ENSG00000274317	ENST00000667295.1	rs71439747	intron_variant	0.0399596118060729
chr3_56788349_T_C	LINC00571	ENSG00000223685	ENST00000454060.2	rs7328911	intron_variant	0.0136617462917256
chr3_56789338_A_G	LINC00571	ENSG00000223685	ENST00000454060.2	rs7318940	intron_variant	0.028226685697309
chr3_57189773_C_T	WBP4	ENSG00000120688	ENST00000379487.5	rs9525446	intron_variant	0.0118904764895211
chr3_57192563_G_T	RGCC	ENSG00000102760	ENST00000379359.4	rs7136	synonymous_variant	0.0118904764895211
chr3_57199633_A_T	LINC02341	ENSG00000283554	ENST00000637462.1	rs9533089	intron_variant	0.0137029774906395
chr3_57262724_C_T	CCDC122	ENSG00000151773	ENST00000444614.8	rs36181000	intron_variant	0.00713171236348838
chr3_57289142_A_G	CCDC122	ENSG00000151773	ENST00000444614.8	rs374087813	intron_variant	0.0382390002130878
chr3_57299699_G_T	CCDC122	ENSG00000151773	ENST00000444614.8	rs1819596	intron_variant	0.0218666499948568
chr3_57313890_G_C	SUCLA2	ENSG00000136143	ENST00000643584.1	rs2038789	intron_variant	0.018280949692323
chr3_57317164_T_C	SUCLA2	ENSG00000136143	ENST00000643584.1	rs9562775	intron_variant	3.07609027882304e-06
chr3_57328969_A_C	SUCLA2	ENSG00000136143	ENST00000643584.1	rs4941616	intron_variant	3.82617978420491e-05
chr3_57348541_C_A	SUCLA2	ENSG00000136143	ENST00000643584.1	rs7337764	intron_variant	6.14060851254084e-07
chr3_57418411_A_G	SUCLA2	ENSG00000136143	ENST00000643584.1	rs9534859	intron_variant	0.0124043896992491
chr3_58087741_C_T	SUCLA2	ENSG00000136143	ENST00000643584.1	rs7998090	intron_variant	4.34240865812178e-05
chr3_58130642_T_C	SUCLA2	ENSG00000136143	ENST00000435617.1	rs4942713	intron_variant	0.000838784799769939
chr3_58633536_G_A	SUCLA2	ENSG00000136143	ENST00000435617.1	rs9534862	intron_variant	0.0396095645428655
chr3_59986827_C_T	SUCLA2	ENSG00000136143	ENST00000435617.1	rs1408618	intron_variant	0.000143015735958594
chr3_60533843_T_G	SUCLA2	ENSG00000136143	ENST00000643584.1	rs9534864	intron_variant	0.012555158978415
chr3_60537235_C_T	SUCLA2	ENSG00000136143	ENST00000643584.1	rs9534867	intron_variant	0.015736603817991
chr3_60553518_T_G	SUCLA2	ENSG00000136143	ENST00000643584.1	rs4508328	intron_variant	0.0104068950971148
chr3_60554357_C_T	SUCLA2	ENSG00000136143	ENST00000643584.1	rs4558305	intron_variant	4.07108456020801e-08
chr3_60554855_A_T	SUCLA2	ENSG00000136143	ENST00000643584.1	rs9526410	intron_variant	1.58643290013884e-07
chr3_60556418_G_T	SUCLA2	ENSG00000136143	ENST00000643584.1	rs2406690	intron_variant	0.000132000648238118
chr3_60556792_C_T	SUCLA2	ENSG00000136143	ENST00000643584.1	rs7321745	intron_variant	0.00274806878498773
chr3_60576116_T_A	SUCLA2	ENSG00000136143	ENST00000643584.1	rs4942715	intron_variant	2.20930929904091e-06
chr3_60616430_T_A	ARL11	ENSG00000152213	ENST00000282026.2	rs1535467	3_prime_UTR_variant	0.00287113980974629
chr3_60619236_C_T	DLEU1	ENSG00000176124	ENST00000490577.5	rs7334566	intron_variant	0.00615542074625209
chr3_63626348_T_C	KLHL1	ENSG00000150361	ENST00000377844.9	rs9542044	intron_variant	2.33077100591104e-13
chr3_65820411_T_C	RABEPKP1	ENSG00000225801	ENST00000440529.1	rs9599813	non_coding_transcript_exon_variant	0.0394935471610914
chr3_65826728_T_A	PIBF1	ENSG00000083535	ENST00000326291.11	rs9543151	intron_variant	0.0394935471610914
chr3_65829104_G_T	KLF12	ENSG00000118922	ENST00000377669.7	rs7325680	intron_variant	0.0227294581099233
chr3_65830528_A_G	KLF12	ENSG00000118922	ENST00000377669.7	rs8000776	intron_variant	0.0216721209035199
chr3_65834519_G_A	KLF12	ENSG00000118922	ENST00000377669.7	rs10507819	intron_variant	0.0400769623503586
chr3_65840317_C_T	KLF12	ENSG00000118922	ENST00000377669.7	rs9600183	intron_variant	0.0145974067213944
chr3_65840339_T_C	KLF12	ENSG00000118922	ENST00000377669.7	rs9600184	intron_variant	0.0260571617500068
chr3_65841491_G_A	KLF12	ENSG00000118922	ENST00000377669.7	rs7317838	intron_variant	0.0338959445746682
chr3_65841633_C_T	KLF12	ENSG00000118922	ENST00000377669.7	rs9530257	intron_variant	0.0262899533486352
chr3_65841993_C_T	KLF12	ENSG00000118922	ENST00000377669.7	rs9530259	intron_variant	0.00772203838440263
chr3_65842179_A_T	KLF12	ENSG00000118922	ENST00000377669.7	rs9543482	intron_variant	0.00772203838440263
chr3_65842262_G_A	KLF12	ENSG00000118922	ENST00000377669.7	rs9543483	intron_variant	0.00772203838440263
chr3_66086567_T_C	KLF12	ENSG00000118922	ENST00000377669.7	rs9565073	intron_variant	4.99064501208737e-11
chr3_68363538_A_T	TBC1D4	ENSG00000136111	ENST00000377636.8	rs489907	intron_variant	0.00137252612604975
chr3_69034024_A_G	SCEL	ENSG00000136155	ENST00000349847.4	rs9600901	intron_variant	0.00231256681678281
chr3_69298723_C_T	SCEL	ENSG00000136155	ENST00000349847.4	rs9593248	intron_variant	0.0353219577999967
chr3_69456202_C_A	OBI1AS1	ENSG00000234377	ENST00000606429.5	rs9805785	intron_variant	1.06850413024318e-05
chr3_69574246_G_A	OBI1	ENSG00000152193	ENST00000282003.7	rs58197164	intron_variant	0.0347037936023616
chr3_69575835_C_G	OBI1	ENSG00000152193	ENST00000282003.7	rs6563055	intron_variant	0.00143955476169637
chr3_71459932_T_G	OBI1	ENSG00000152193	ENST00000282003.7	rs7989543	intron_variant	0.0033457782022589
chr3_71658924_A_C	RBM26	ENSG00000139746	ENST00000438737.3	rs9565491	intron_variant	0.00286217327966397
chr3_71659286_T_C	RBM26	ENSG00000139746	ENST00000438737.3	rs35476664	intron_variant	0.0472125363646699
chr3_75612065_G_A	RBM26	ENSG00000139746	ENST00000438737.3	rs7336581	intron_variant	5.56234957024626e-06
chr3_75758830_A_C	RBM26AS1	ENSG00000227354	ENST00000656024.1	rs7331525	intron_variant	5.72257825578025e-05
chr3_98456567_T_C	GPC5	ENSG00000179399	ENST00000377067.9	rs6492622	intron_variant	4.90500937402249e-09
chr3_98456614_C_T	GPC5	ENSG00000179399	ENST00000377067.9	rs9523731	intron_variant	9.38192799402721e-09
chr3_98456721_G_A	GPC5	ENSG00000179399	ENST00000377067.9	rs9523734	intron_variant	2.28706978857887e-09
chr3_98456770_G_A	GPC5	ENSG00000179399	ENST00000377067.9	rs7999205	intron_variant	2.28706978857887e-09
chr3_98456869_T_C	GPC5	ENSG00000179399	ENST00000377067.9	rs7997647	intron_variant	3.82773719498059e-08
chr3_98456878_G_C	GPC5	ENSG00000179399	ENST00000377067.9	rs995542	intron_variant	4.95091487124103e-10
chr3_98456914_C_T	GPC5	ENSG00000179399	ENST00000377067.9	rs995541	intron_variant	1.54906420143552e-15
chr3_98456986_C_T	GPC5	ENSG00000179399	ENST00000377067.9	rs1333672	intron_variant	0.00695910557235194
chr3_98475518_A_G	CLDN10	ENSG00000134873	ENST00000376873.7	rs9584305	intron_variant	5.46448222234386e-06
chr3_98475879_G_A	CLDN10	ENSG00000134873	ENST00000376873.7	rs7320262	intron_variant	7.7577492406028e-06
chr3_98477716_C_T	UGGT2	ENSG00000102595	ENST00000376747.8	rs7986993	intron_variant	2.06284696558272e-06
chr3_98482014_G_A	HS6ST3	ENSG00000185352	ENST00000376705.4	rs7331762	intron_variant	7.7577492406028e-06
chr3_98482537_A_G	HS6ST3	ENSG00000185352	ENST00000376705.4	rs9590370	intron_variant	5.46448222234386e-06
chr3_98482849_A_G	MBNL2	ENSG00000139793	ENST00000679496.1	rs1410759	intron_variant	5.46448222234386e-06
chr3_98483394_T_C	MBNL2	ENSG00000139793	ENST00000679496.1	rs1974086	intron_variant	7.7577492406028e-06
chr3_98483829_C_G	MBNL2	ENSG00000139793	ENST00000679496.1	rs877671	intron_variant	3.61414256883037e-06
chr3_98484214_C_T	MBNL2	ENSG00000139793	ENST00000679496.1	rs9516902	intron_variant	1.22332335565821e-06
chr3_98484367_A_T	MBNL2	ENSG00000139793	ENST00000679496.1	rs9516904	intron_variant	9.89840485081174e-07
chr3_98485046_T_A	MBNL2	ENSG00000139793	ENST00000679496.1	rs949741	intron_variant	1.08059847581225e-06
chr3_98486296_A_G	MBNL2	ENSG00000139793	ENST00000679496.1	rs1316549	intron_variant	3.13175199060254e-06
chr3_98488704_A_T	MBNL2	ENSG00000139793	ENST00000679496.1	rs61974439	intron_variant	3.13175199060254e-06
chr3_98488928_A_G	MBNL2	ENSG00000139793	ENST00000679496.1	rs9516907	intron_variant	3.13175199060254e-06
chr3_98490029_G_A	MBNL2	ENSG00000139793	ENST00000679496.1	rs9513235	intron_variant	4.46159349675991e-06
chr3_98494016_C_T	MBNL2	ENSG00000139793	ENST00000679496.1	rs4771270	intron_variant	5.94011271696755e-07
chr3_98494034_G_A	MBNL2	ENSG00000139793	ENST00000679496.1	rs7995199	intron_variant	2.58884858709086e-06
chr3_98495921_A_G	MBNL2	ENSG00000139793	ENST00000679496.1	rs1973419	intron_variant	8.77175515295257e-07
chr3_98537848_G_A	MBNL2	ENSG00000139793	ENST00000679496.1	rs7320865	intron_variant	0.000756691727441281
chr3_99038622_T_C	MBNL2	ENSG00000139793	ENST00000679496.1	rs1463790	intron_variant	0.00735335488664146
chr3_100334239_G_A	MBNL2	ENSG00000139793	ENST00000679496.1	rs2291785	intron_variant	0.00717551276284566
chr3_100336281_C_T	MBNL2	ENSG00000139793	ENST00000679496.1	rs1553013	intron_variant	0.0426203045098335
chr3_100341935_C_T	MBNL2	ENSG00000139793	ENST00000679496.1	rs7338689	intron_variant	0.00074699982149638
chr3_100346788_G_A	MBNL2	ENSG00000139793	ENST00000679496.1	rs9556702	intron_variant	0.000528420947010373
chr3_101251396_T_C	MBNL2	ENSG00000139793	ENST00000679496.1	rs9556706	intron_variant	0.0368063452442805
chr3_101442486_A_C	MBNL2	ENSG00000139793	ENST00000679496.1	rs9513237	intron_variant	0.0295070079294931
chr3_102041704_T_G	MBNL2	ENSG00000139793	ENST00000679496.1	rs2011452	intron_variant	0.000169497388541185
chr3_104942906_A_G	MBNL2	ENSG00000139793	ENST00000679496.1	rs9516914	intron_variant	4.585565346442e-07
chr3_105045757_T_C	MBNL2	ENSG00000139793	ENST00000679496.1	rs3782983	intron_variant	0.0170643076523234
chr3_105167782_T_A	MBNL2	ENSG00000139793	ENST00000679496.1	rs7318250	intron_variant	0.0317676620132362
chr3_105484821_G_T	MBNL2	ENSG00000139793	ENST00000679496.1	rs6491350	intron_variant	0.0469376209589852
chr3_105486706_T_C	MBNL2	ENSG00000139793	ENST00000679496.1	rs9284176	intron_variant	0.0179556485802661
chr3_108537463_G_C	SLC15A1	ENSG00000088386	ENST00000376503.10	rs4646208	intron_variant	1.47116054574957e-07
chr3_108537585_A_C	TM9SF2	ENSG00000125304	ENST00000376387.5	rs9517766	intron_variant	3.49994168096139e-05
chr3_108540090_A_T	TM9SF2	ENSG00000125304	ENST00000376387.5	rs9517767	intron_variant	3.06922177341735e-07
chr3_108541848_A_G	PCCADT	ENSG00000274605	ENST00000654763.1	rs2390360	intron_variant	3.06922177341735e-07
chr3_108721766_A_C	NALF1	ENSG00000204442	ENST00000375915.4	rs11620205	intron_variant	4.89437033173599e-06
chr3_108737407_C_A	NALF1	ENSG00000204442	ENST00000375915.4	rs9555359	intron_variant	0.0177951212829688
chr3_108738302_A_G	MYO16	ENSG00000041515	ENST00000457511.7	rs277800	intron_variant	0.0234853683237851
chr3_120261704_T_C	IRS2	ENSG00000185950	ENST00000375856.5	rs8001323	intron_variant	0.000730330399418701
chr3_120276245_C_T	IRS2	ENSG00000185950	ENST00000375856.5	rs4771644	intron_variant	0.0424957069179089
chr3_120277208_G_A	IRS2	ENSG00000185950	ENST00000375856.5	rs9559646	intron_variant	0.0424957069179089
chr3_120280211_C_A	COL4A1	ENSG00000187498	ENST00000375820.10	rs12019921	intron_variant	0.0424957069179089
chr3_120282388_G_A	COL4A2	ENSG00000134871	ENST00000360467.7	rs4773143	intron_variant	0.0424957069179089
chr3_120389761_C_T	COL4A2	ENSG00000134871	ENST00000360467.7	rs4773144	intron_variant	0.00260554125462615
chr3_121510959_A_G	COL4A2	ENSG00000134871	ENST00000360467.7	rs3809346	intron_variant	0.0168104622039819
chr3_122164341_G_A	COL4A2	ENSG00000134871	ENST00000360467.7	rs4512966	intron_variant	2.09286604719123e-06
chr3_122362813_A_C	COL4A2	ENSG00000134871	ENST00000360467.7	rs7994585	intron_variant	0.0322396234254779
chr3_122686146_T_C	COL4A2	ENSG00000134871	ENST00000360467.7	rs7326779	intron_variant	0.00145333945874226
chr3_122938357_C_T	COL4A2	ENSG00000134871	ENST00000360467.7	rs11617206	intron_variant	0.0172700713299466
chr3_124685013_G_A	COL4A2	ENSG00000134871	ENST00000360467.7	rs9521801	intron_variant	0.0391474772506838
chr3_124730405_T_C	RAB20	ENSG00000139832	ENST00000267328.5	rs34219917	intron_variant	1.86424102781776e-06
chr3_124742908_C_T	RAB20	ENSG00000139832	ENST00000267328.5	rs56378310	intron_variant	3.53738725408136e-06
chr3_124752891_A_G	ARHGEF7	ENSG00000102606	ENST00000646102.2	rs9522150	intron_variant	2.7134480312619e-07
chr3_124753817_A_G	ARHGEF7	ENSG00000102606	ENST00000646102.2	rs942653	intron_variant	0.0018665551017703
chr3_124756957_G_T	ARHGEF7	ENSG00000102606	ENST00000646102.2	rs7987430	intron_variant	2.78188594865678e-06
chr3_124757248_A_G	ARHGEF7	ENSG00000102606	ENST00000646102.2	rs7326370	intron_variant	0.00434363639928816
chr3_124758358_A_G	ARHGEF7	ENSG00000102606	ENST00000646102.2	rs7327991	intron_variant	8.50245805551455e-06
chr3_124759887_A_G	ARHGEF7	ENSG00000102606	ENST00000646102.2	rs7332891	intron_variant	2.78188594865678e-06
chr3_124760734_T_A	ARHGEF7	ENSG00000102606	ENST00000646102.2	rs4773333	intron_variant	2.78188594865678e-06
chr3_124761796_T_C	ARHGEF7	ENSG00000102606	ENST00000646102.2	rs4771734	intron_variant	2.78188594865678e-06
chr3_125076740_A_G	ARHGEF7	ENSG00000102606	ENST00000646102.2	rs9515386	intron_variant	1.41858073219465e-05
chr3_125078876_T_C	ARHGEF7	ENSG00000102606	ENST00000646102.2	rs9522155	intron_variant	0.00266333223237279
chr3_125082025_A_G	ARHGEF7	ENSG00000102606	ENST00000646102.2	rs7983454	intron_variant	0.0204787004316901
chr3_125083059_C_T	ARHGEF7	ENSG00000102606	ENST00000646102.2	rs7982199	intron_variant	0.0365906289874103
chr3_125083387_T_C	ARHGEF7	ENSG00000102606	ENST00000646102.2	rs1106830	intron_variant	0.0365906289874103
chr3_125083705_G_A	ARHGEF7	ENSG00000102606	ENST00000646102.2	rs7991145	intron_variant	0.0255217655731265
chr3_125083833_A_G	ARHGEF7	ENSG00000102606	ENST00000646102.2	rs7317770	intron_variant	0.0365906289874103
chr3_125084037_A_G	ARHGEF7	ENSG00000102606	ENST00000646102.2	rs9515390	intron_variant	0.0365906289874103
chr3_125084044_C_T	ARHGEF7	ENSG00000102606	ENST00000646102.2	rs3783094	intron_variant	0.0365906289874103
chr3_125084199_G_A	ARHGEF7	ENSG00000102606	ENST00000646102.2	rs12865137	intron_variant	0.0365906289874103
chr3_125084256_C_G	ARHGEF7	ENSG00000102606	ENST00000646102.2	rs3783092	intron_variant	0.0365906289874103
chr3_125084566_G_A	ARHGEF7	ENSG00000102606	ENST00000646102.2	rs4771735	intron_variant	0.0365906289874103
chr3_125084714_T_C	ARHGEF7	ENSG00000102606	ENST00000646102.2	rs3783090	intron_variant	0.0365906289874103
chr3_125084755_A_G	ARHGEF7	ENSG00000102606	ENST00000646102.2	rs2274206	intron_variant	0.015179367432433
chr3_125084771_G_A	ARHGEF7	ENSG00000102606	ENST00000646102.2	rs3783088	intron_variant	6.75753221508987e-05
chr3_125091853_G_A	ARHGEF7	ENSG00000102606	ENST00000646102.2	rs7995910	intron_variant	0.0134168880797663
chr3_125093371_T_C	ARHGEF7	ENSG00000102606	ENST00000646102.2	rs9515394	intron_variant	0.0207863977020303
chr3_125095503_G_A	ARHGEF7	ENSG00000102606	ENST00000646102.2	rs9522159	intron_variant	0.0211615863994819
chr3_125095846_T_C	ARHGEF7	ENSG00000102606	ENST00000646102.2	rs9522162	intron_variant	0.00710991013061346
chr3_125096670_G_C	ARHGEF7	ENSG00000102606	ENST00000646102.2	rs7989545	intron_variant	0.00275668591381823
chr3_125099494_G_A	ARHGEF7	ENSG00000102606	ENST00000646102.2	rs7990085	intron_variant	0.0102191335747034
chr3_125486216_T_C	ARHGEF7	ENSG00000102606	ENST00000646102.2	rs9522166	intron_variant	0.0291601603616311
chr3_125506584_T_C	ARHGEF7	ENSG00000102606	ENST00000646102.2	rs4771738	intron_variant	0.00150022693803913
chr3_125519255_G_A	ARHGEF7	ENSG00000102606	ENST00000646102.2	rs7331778	intron_variant	2.06284696558272e-06
chr3_125535171_T_C	ARHGEF7	ENSG00000102606	ENST00000646102.2	rs9522168	intron_variant	0.000131121186555259
chr3_125555903_A_G	ARHGEF7	ENSG00000102606	ENST00000646102.2	rs6492349	intron_variant	1.54961996004159e-06
chr3_125559251_T_C	ARHGEF7	ENSG00000102606	ENST00000646102.2	rs9515397	intron_variant	0.00131272485602789
chr3_125567855_C_A	ARHGEF7	ENSG00000102606	ENST00000646102.2	rs7335121	intron_variant	0.00557838823377203
chr3_125573949_C_T	ARHGEF7	ENSG00000102606	ENST00000646102.2	rs1359429	intron_variant	0.00426362930143572
chr3_125578345_G_T	TEX29	ENSG00000153495	ENST00000283547.2	rs4771744	intron_variant	0.00557838823377203
chr3_125581832_T_C	LINC00354	ENSG00000226903	ENST00000663211.1	rs7492270	intron_variant	0.0026969159953968
chr3_125582867_C_G	ATP11A	ENSG00000068650	ENST00000375645.8	rs417535	intron_variant	0.00426362930143572
chr3_125635376_A_T	ATP11A	ENSG00000068650	ENST00000375645.8	rs1278761	intron_variant	0.0415116149953459
chr3_125635881_A_G	ATP11A	ENSG00000068650	ENST00000375645.8	rs1278763	intron_variant	0.0325260717082591
chr3_125678614_A_G	ATP11A	ENSG00000068650	ENST00000375645.8	rs1765871	intron_variant	0.00217156347593477
chr3_127268572_G_T	ATP11A	ENSG00000068650	ENST00000375645.8	rs1765762	intron_variant	8.41600324067692e-13
chr3_127268573_C_T	ATP11A	ENSG00000068650	ENST00000375645.8	rs1278766	intron_variant	8.41600324067692e-13
chr3_127269547_T_C	ATP11A	ENSG00000068650	ENST00000375645.8	rs1278768	intron_variant	8.41600324067692e-13
chr3_127271319_A_T	ATP11A	ENSG00000068650	ENST00000375645.8	rs1290177	intron_variant	2.94424147083053e-09
chr3_127272244_A_G	ATP11A	ENSG00000068650	ENST00000375645.8	rs3742232	3_prime_UTR_variant	3.94458276372836e-12
chr3_127272299_T_C	ATP11A	ENSG00000068650	ENST00000375645.8	rs1063098	3_prime_UTR_variant	3.94458276372836e-12
chr3_127273630_C_A	ATP11A	ENSG00000068650	ENST00000375645.8	rs1046793	3_prime_UTR_variant	3.94458276372836e-12
chr3_127276290_G_C	MCF2L	ENSG00000126217	ENST00000375608.7	rs1890202	intron_variant	5.10010042390812e-12
chr3_127276965_G_A	MCF2L	ENSG00000126217	ENST00000535094.7	rs487784	intron_variant	3.94458276372836e-12
chr3_128622053_T_C	OSGEP	ENSG00000092094	ENST00000206542.9	rs3120072	intron_variant	0.0132960693207955
chr3_128626336_A_G	OXA1LDT	ENSG00000258458	ENST00000650620.1	rs1242748	intron_variant	0.0132960693207955
chr3_128627371_G_A	SLC7A7	ENSG00000155465	ENST00000674313.1	rs8014410	intron_variant	0.0132960693207955
chr3_128628028_T_C	HAUS4	ENSG00000092036	ENST00000541587.6	rs76018212	intron_variant	0.00192036005186578
chr3_128631474_G_A	SLC7A8	ENSG00000092068	ENST00000316902.12	rs71418270	intron_variant	0.00916004698933658
chr3_128632912_C_T	BCL2L2	ENSG00000129473	ENST00000679219.1	rs7158551	intron_variant	0.0132960693207955
chr3_128635107_C_A	CARMIL3	ENSG00000186648	ENST00000342740.6	rs7146599	intron_variant	0.0218666499948568
chr3_128635333_G_C	GMPR2	ENSG00000100938	ENST00000399440.7	rs12891162	intron_variant	0.0346017960068457
chr3_128646842_A_G	FOXG1AS1	ENSG00000257126	ENST00000658593.1	rs58598762	intron_variant	0.0132960693207955
chr3_128651667_T_C	PRKD1	ENSG00000184304	ENST00000331968.11	rs12323725	intron_variant	0.0147297428038098
chr3_128651968_A_G	PRKD1	ENSG00000184304	ENST00000331968.11	rs10143659	intron_variant	0.0132960693207955
chr3_128653160_C_T	AP4S1	ENSG00000100478	ENST00000542754.7	rs112677610	intron_variant	0.0132960693207955
chr3_128700211_A_G	HEATR5A	ENSG00000129493	ENST00000543095.7	rs2094130	intron_variant	0.00241655267257661
chr3_128700781_G_C	HEATR5A	ENSG00000129493	ENST00000543095.7	rs7159731	intron_variant	0.00345166060867334
chr3_128700806_G_A	HEATR5A	ENSG00000129493	ENST00000543095.7	rs8005942	intron_variant	0.00241655267257661
chr3_128700913_A_G	HEATR5A	ENSG00000129493	ENST00000543095.7	rs11622544	intron_variant	0.00241655267257661
chr3_128702844_T_C	HEATR5A	ENSG00000129493	ENST00000543095.7	rs11156666	intron_variant	0.00241655267257661
chr3_128703720_T_C	HEATR5A	ENSG00000129493	ENST00000543095.7	rs45490191	intron_variant	0.00779314720879462
chr3_128705613_T_C	HEATR5A	ENSG00000129493	ENST00000543095.7	rs7149240	intron_variant	0.00967546166674545
chr3_128706105_T_C	HEATR5A	ENSG00000129493	ENST00000543095.7	rs11156667	intron_variant	0.0326221042913519
chr3_133690574_A_G	HEATR5A	ENSG00000129493	ENST00000543095.7	rs34709766	intron_variant	0.00625069410271158
chr3_133691781_C_A	HEATR5A	ENSG00000129493	ENST00000543095.7	rs6571416	intron_variant	0.00625069410271158
chr3_133692634_T_C	HEATR5A	ENSG00000129493	ENST00000543095.7	rs7157977	missense_variant	0.00625069410271158
chr3_133693271_T_C	HEATR5A	ENSG00000129493	ENST00000543095.7	rs17097870	intron_variant	2.92720309449694e-05
chr3_140624475_G_T	DTD2	ENSG00000129480	ENST00000310850.9	rs13176	3_prime_UTR_variant	8.0362724025162e-06
chr3_140625674_G_A	DTD2	ENSG00000129480	ENST00000310850.9	rs7153450	3_prime_UTR_variant	8.0362724025162e-06
chr3_140629065_T_G	DTD2	ENSG00000129480	ENST00000310850.9	rs7159566	3_prime_UTR_variant	6.80723020687946e-06
chr3_140641729_T_C	DTD2	ENSG00000129480	ENST00000310850.9	rs7149165	intron_variant	3.95195246997424e-06
chr3_140643759_C_G	DTD2	ENSG00000129480	ENST00000310850.9	rs11845830	intron_variant	3.95195246997424e-06
chr3_140644319_A_T	DTD2	ENSG00000129480	ENST00000310850.9	rs8012658	intron_variant	3.95195246997424e-06
chr3_140652892_C_A	DTD2	ENSG00000129480	ENST00000310850.9	rs12893465	intron_variant	7.20334276626775e-06
chr3_140655574_G_A	DTD2	ENSG00000129480	ENST00000310850.9	rs7157390	intron_variant	6.09967766681387e-06
chr3_140659562_T_A	DTD2	ENSG00000129480	ENST00000310850.9	rs34278949	intron_variant	7.20334276626775e-06
chr3_140664169_C_T	DTD2	ENSG00000129480	ENST00000310850.9	rs11845550	intron_variant	7.20334276626775e-06
chr3_140666318_T_C	DTD2	ENSG00000129480	ENST00000310850.9	rs12891787	intron_variant	7.20334276626775e-06
chr3_140666971_C_A	DTD2	ENSG00000129480	ENST00000310850.9	rs4981101	intron_variant	7.20334276626775e-06
chr3_145791684_T_G	NUBPL	ENSG00000151413	ENST00000281081.12	rs11156695	intron_variant	1.68501084097835e-07
chr3_145791863_G_A	NUBPL	ENSG00000151413	ENST00000281081.12	rs10129541	intron_variant	0.00242415262568415
chr3_145791997_C_T	AKAP6	ENSG00000151320	ENST00000280979.9	rs11156764	intron_variant	0.00242415262568415
chr3_145792715_G_T	NPAS3	ENSG00000151322	ENST00000551492.5	rs2184626	intron_variant	0.00242415262568415
chr3_145792731_C_T	NPAS3	ENSG00000151322	ENST00000551492.5	rs912855	intron_variant	0.00242415262568415
chr3_145792976_G_A	NPAS3	ENSG00000151322	ENST00000551492.5	rs9322920	intron_variant	0.00242415262568415
chr3_145793314_C_T	NPAS3	ENSG00000151322	ENST00000551492.5	rs11156784	intron_variant	0.00242415262568415
chr3_145793718_A_G	NPAS3	ENSG00000151322	ENST00000551492.5	rs10483432	intron_variant	0.00242415262568415
chr3_145794063_C_T	NPAS3	ENSG00000151322	ENST00000551492.5	rs12586992	intron_variant	0.00242415262568415
chr3_145794171_T_C	NPAS3	ENSG00000151322	ENST00000551492.5	rs1604190	intron_variant	0.00242415262568415
chr3_145794417_A_G	NPAS3	ENSG00000151322	ENST00000681323.1	rs4301935	intron_variant	0.00297160096323567
chr3_145794421_G_A	NPAS3	ENSG00000151322	ENST00000681323.1	rs35636207	intron_variant	0.00297160096323567
chr3_145794493_A_G	NPAS3	ENSG00000151322	ENST00000681323.1	rs58842363	intron_variant	0.00242415262568415
chr3_145794518_A_C	NPAS3	ENSG00000151322	ENST00000681323.1	rs4146554	intron_variant	0.0359508427176372
chr3_145794629_T_A	NPAS3	ENSG00000151322	ENST00000681323.1	rs10498323	intron_variant	0.0359508427176372
chr3_145794654_T_G	NPAS3	ENSG00000151322	ENST00000681323.1	rs2383533	intron_variant	0.00242415262568415
chr3_145796840_T_C	BAZ1A	ENSG00000198604	ENST00000360310.6	rs78786712	intron_variant	0.00242415262568415
chr3_145796850_A_C	PRORP	ENSG00000100890	ENST00000534898.9	rs8004288	intron_variant	0.00242415262568415
chr3_145797484_T_A	PRORP	ENSG00000100890	ENST00000534898.9	rs12586302	intron_variant	0.0459876374989714
chr3_145798078_C_G	PRORP	ENSG00000100890	ENST00000534898.9	rs57856432	intron_variant	0.0141220213442387
chr3_145798088_A_G	PRORP	ENSG00000100890	ENST00000534898.9	rs60049741	intron_variant	0.00297160096323567
chr3_157572147_G_A	RALGAPA1	ENSG00000174373	ENST00000680220.1	rs61989600	intron_variant	1.16635798986963e-05
chr3_180720533_C_T	LINC02307	ENSG00000258969	ENST00000654351.1	rs1950540	intron_variant	0.0017301769292946
chr3_180720674_A_G	LINC02307	ENSG00000258969	ENST00000654351.1	rs7159609	intron_variant	0.0017301769292946
chr3_180722834_T_C	LINC02307	ENSG00000258969	ENST00000654351.1	rs7149235	intron_variant	0.0173738583218604
chr3_180723166_G_A	LINC02307	ENSG00000258969	ENST00000654351.1	rs1955961	intron_variant	0.0017301769292946
chr3_180723188_G_A	LINC02307	ENSG00000258969	ENST00000654351.1	rs1955960	intron_variant	0.0017301769292946
chr3_183805869_A_G	LINC02307	ENSG00000258969	ENST00000654351.1	rs1950537	intron_variant	0.00303731026671702
chr3_183875668_T_C	LINC02307	ENSG00000258969	ENST00000654351.1	rs1950536	intron_variant	0.0339959148877529
chr3_184031125_T_C	LINC02307	ENSG00000258969	ENST00000654351.1	rs7153909	intron_variant	0.00111566451723956
chr3_185853239_G_A	LINC02307	ENSG00000258969	ENST00000654351.1	rs1955958	intron_variant	0.0262121318635913
chr3_185853318_T_C	LINC02307	ENSG00000258969	ENST00000654351.1	rs2069197	intron_variant	0.000353813784361713
chr3_186288081_T_C	LINC02307	ENSG00000258969	ENST00000654351.1	rs62011040	intron_variant	0.0373510694827231
chr3_191881576_A_G	MDGA2	ENSG00000139915	ENST00000399232.8	rs80138117	intron_variant	0.000258095742385229
chr3_191886828_A_G	MDGA2	ENSG00000139915	ENST00000399232.8	rs8016013	intron_variant	0.00519662207165229
chr3_191899984_T_G	LRR1	ENSG00000165501	ENST00000298288.11	rs111645722	intron_variant	0.00927221607986665
chr3_191903822_A_G	LRR1	ENSG00000165501	ENST00000298288.11	rs112307231	intron_variant	0.00823341443852738
chr3_191904750_T_C	SOS2	ENSG00000100485	ENST00000216373.10	rs9788447	intron_variant	0.00823341443852738
chr3_192541718_A_G	LINC00640	ENSG00000258479	ENST00000556479.6	rs17831132	intron_variant	4.37217933517575e-05
chr3_193950044_A_G	FRMD6	ENSG00000139926	ENST00000344768.10	rs1956576	intron_variant	0.00423728148169261
chr3_194117855_G_A	FRMD6	ENSG00000139926	ENST00000344768.10	rs66820903	intron_variant	0.00151939320556251
chr3_194118521_A_G	NID2	ENSG00000087303	ENST00000216286.10	rs8004226	intron_variant	0.0136206360950474
chr3_194119119_G_A	NID2	ENSG00000087303	ENST00000216286.10	rs2645743	intron_variant	0.00203897395624687
chr3_194120954_C_T	FERMT2	ENSG00000073712	ENST00000341590.8	rs3825593	intron_variant	0.00713171236348838
chr3_194121678_A_C	SAMD4A	ENSG00000020577	ENST00000554335.6	rs145131147	intron_variant	6.91962703420315e-05
chr3_194126352_C_T	TBPL2	ENSG00000182521	ENST00000556755.1	rs10144130	intron_variant	0.00976407159782828
chr3_195058683_C_T	TBPL2	ENSG00000182521	ENST00000556755.1	rs998871	intron_variant	3.79039737987172e-10
chr3_195093429_T_A	TBPL2	ENSG00000182521	ENST00000556755.1	rs6573033	intron_variant	0.000506568347986439
chr3_195102739_A_G	TBPL2	ENSG00000182521	ENST00000556755.1	rs955257	intron_variant	4.70603048944012e-07
chr3_195105196_G_A	ARMH4	ENSG00000139971	ENST00000267485.7	rs12888960	intron_variant	0.00325320140013116
chr3_195105408_C_T	LINC01500	ENSG00000258583	ENST00000648996.1	rs856220	intron_variant	0.00325320140013116
chr3_195107806_G_A	LINC01500	ENSG00000258583	ENST00000648996.1	rs12891570	intron_variant	0.0372415001905703
chr3_195112759_G_A	GPR135	ENSG00000181619	ENST00000481661.1	rs10148777	intron_variant	0.000252206579449118
chr3_195112894_C_T	PRKCH	ENSG00000027075	ENST00000332981.11	rs2250116	intron_variant	0.000607479793024539
chr3_195112983_C_A	SNAPC1	ENSG00000023608	ENST00000216294.5	rs72716705	intron_variant	0.00049356284863511
chr3_195113076_T_C	SYT16	ENSG00000139973	ENST00000683842.1	rs1254918	intron_variant	0.0398425959414249
chr3_195114460_G_A	KCNH5	ENSG00000140015	ENST00000322893.12	rs7149511	intron_variant	0.000607479793024539
chr3_195119073_T_C	FUT8	ENSG00000033170	ENST00000673929.1	rs3783709	intron_variant	0.00166569029523507
chr4_4833212_A_C	GALNT16	ENSG00000100626	ENST00000448469.8	rs4902710	intron_variant	0.000857871482441584
chr4_5143706_C_A	TTC9DT	ENSG00000245466	ENST00000500016.1	rs10139930	intron_variant	0.0249970952551246
chr4_5816617_T_C	TTC9DT	ENSG00000245466	ENST00000500016.1	rs10162527	intron_variant	2.06843413962059e-09
chr4_6096657_A_T	RGS6	ENSG00000182732	ENST00000553525.6	rs12895509	intron_variant	0.0496134926605978
chr4_6102899_A_G	RGS6	ENSG00000182732	ENST00000553525.6	rs2238244	intron_variant	0.0105659303714632
chr4_6376326_G_A	RGS6	ENSG00000182732	ENST00000553525.6	rs2238243	intron_variant	4.58625202280068e-05
chr4_6743395_G_T	RGS6	ENSG00000182732	ENST00000553525.6	rs763507	intron_variant	0.00229085983159515
[truncated: 6,568 more rows]
